# Supplementary material for: Impact of charges on the hybridization kinetics and thermal stability of PNA duplexes
Source: Royal Society of Chemistry journal article supplement (doi:10.1039/d4ob00887a), 2024-01-01
Supplement: d4ob00887a1.pdf [file d4ob00887a1.pdf]

## SUPPORTING INFORMATION

### Impact of charges on the hybridization kinetics and thermal duplex stability of PNA

Miguel López-Tena<sup>a</sup> and Nicolas Winssinger<sup>\*a</sup>

nicolas.winssinger@unige.ch

#### Table of Contents

|                                                                                              |    |
|----------------------------------------------------------------------------------------------|----|
| Figures S1 to S4 .....                                                                       | 2  |
| Abbreviations.....                                                                           | 7  |
| Synthesis of PNA oligomers .....                                                             | 8  |
| Protocols for the synthesis of compounds Az-A/H/N/G/P.....                                   | 8  |
| Characterisation of PNA oligomers .....                                                      | 10 |
| Copies of the SPR response curves and the 1:1 binding model fitting curves.                  | 46 |
| Copies of the <sup>1</sup> H and <sup>13</sup> C NMR spectra for compounds Az-A/H/N/G/P..... | 46 |
| References .....                                                                             | 60 |

## Figures S1 to S4

**PNA1-ach-F:** C-Ter: GTG AAT CCC AGT-Lys(FITC)-Ac

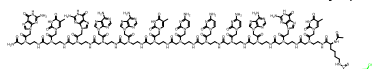

**PNA1-H1-F:** C-Ter: GTG AAT CC<sup>H</sup>C AGT-Lys(FITC)-Ac

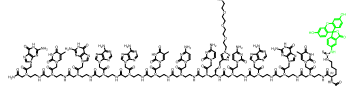

**PNA1-H4-F:** C-Ter: GT<sup>H</sup>G AA<sup>H</sup>T CC<sup>H</sup>C AG<sup>H</sup>T-Lys(FITC)-Ac

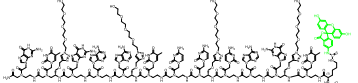

**PNA1-A1-F:** C-Ter: GTG AAT CC<sup>A</sup>C AGT-Lys(FITC)-Ac

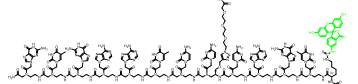

**PNA1-A4-F:** C-Ter: GT<sup>A</sup>G AA<sup>A</sup>T CC<sup>A</sup>C AG<sup>A</sup>T-Lys(FITC)-Ac

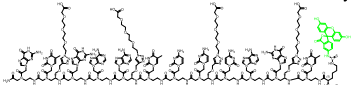

**PNA1-N1-F:** C-Ter: GTG AAT CC<sup>N</sup>C AGT-Lys(FITC)-Ac

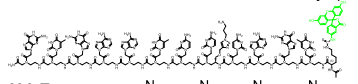

**PNA1-N4-F:** C-Ter: GT<sup>N</sup>G AA<sup>N</sup>T CC<sup>N</sup>C AG<sup>N</sup>T-Lys(FITC)-Ac

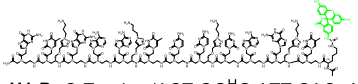

**PNA1-H1-D:** C-Ter: Lys(ACT GG<sup>H</sup>G ATT CAC -Ac)-DabcyI

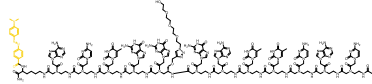

**PNA1-H4-D:** C-Ter: Lys(AC<sup>H</sup>T GG<sup>H</sup>G AT<sup>H</sup>T CA<sup>H</sup>C -Ac)-DabcyI

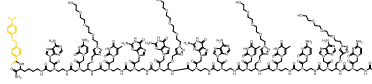

**PNA1-A1-D:** C-Ter: Lys(ACT GG<sup>A</sup>G ATT CAC -Ac)-DabcyI

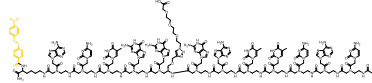

**PNA1-A4-D:** C-Ter: Lys(AC<sup>A</sup>T GG<sup>A</sup>G AT<sup>A</sup>T CA<sup>A</sup>C -Ac)-DabcyI

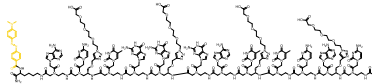

**DNA1-D:** 5'- CACTTAGGGTCA- 3' 3'-DabcyI modification

**DNA3-D:** 5'- CACTTAGAGTCA- 3' 3'-DabcyI modification / A:C mismatch

**DNA5-D:** 5'- CACTTAGCGTCA- 3' 3'-DabcyI modification / C:C mismatch

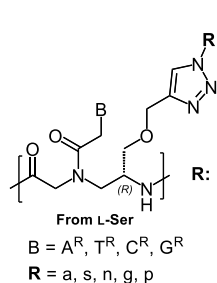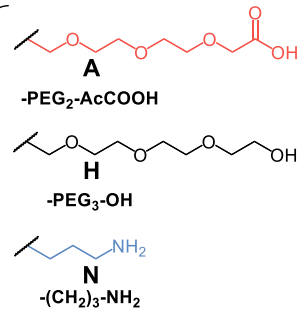

**PNA1-ach-D:** C-Ter: Lys(ACT GGG ATT CAC -Ac)-DabcyI

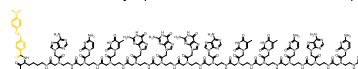

**PNA1-G1-F:** C-Ter: GTG AAT CC<sup>G</sup>C AGT-Lys(FITC)-Ac

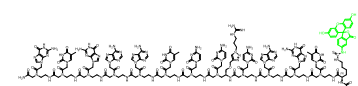

**PNA1-G4-F:** C-Ter: GT<sup>G</sup>G AA<sup>G</sup>T CC<sup>G</sup>C AG<sup>G</sup>T-Lys(FITC)-Ac

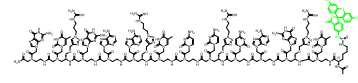

**PNA-P1-F:** C-Ter: GTG AAT CC<sup>P</sup>C AGT-Lys(FITC)-Ac

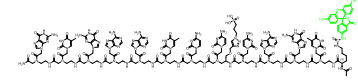

**PNA1-P4-F:** C-Ter: GT<sup>P</sup>G AA<sup>P</sup>T CC<sup>P</sup>C AG<sup>P</sup>T-Lys(FITC)-Ac

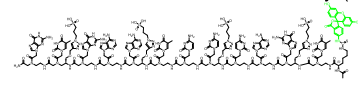

**PNA1-N1-D:** C-Ter: Lys(ACT GG<sup>N</sup>G ATT CAC -Ac)-DabcyI

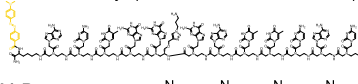

**PNA1-N4-D:** C-Ter: Lys(AC<sup>N</sup>T GG<sup>N</sup>G AT<sup>N</sup>T CA<sup>N</sup>C -Ac)-DabcyI

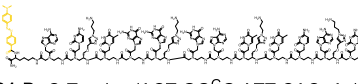

**PNA1-G1-D:** C-Ter: Lys(ACT GG<sup>G</sup>G ATT CAC -Ac)-DabcyI

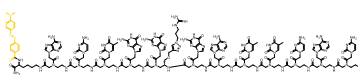

**PNA1-G4-D:** C-Ter: Lys(AC<sup>G</sup>T GG<sup>G</sup>G AT<sup>G</sup>T CA<sup>G</sup>C -Ac)-DabcyI

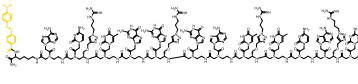

**PNA1-P1-D:** C-Ter: Lys(ACT GG<sup>P</sup>G ATT CAC -Ac)-DabcyI

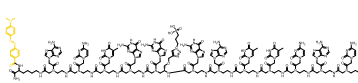

**PNA1-P4-D:** C-Ter: Lys(AC<sup>P</sup>T GG<sup>P</sup>G AT<sup>P</sup>T CA<sup>P</sup>C -Ac)-DabcyI

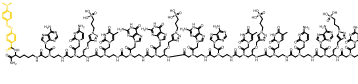

**DNA2-F:** 5'- TGACCCTAAGTG -3' 5'-FITC modification

**DNA4-D:** 5'- CACTTAGTGTCA- 3' 3'-DabcyI modification / T:C mismatch

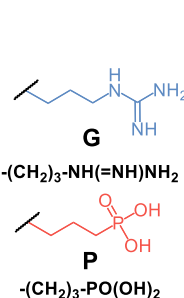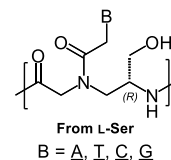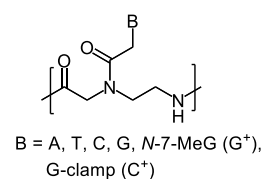

**Figure S1.** Detailed structures of all PNA/DNA oligomers used in this work for FRET  $T_m$  and  $K_D$  measurements.

**PNA2-H1:** C-Ter: GTG AA<sup>H</sup>T CC -Ac

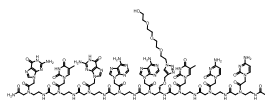

**PNA2-H3:** C-Ter: GT<sup>H</sup>G AA<sup>H</sup>T CC<sup>H</sup> -Ac

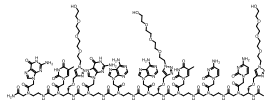

**PNA2-A3:** C-Ter: GT<sup>A</sup>G AA<sup>A</sup>T CC<sup>A</sup> -Ac

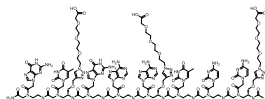

**PNA2-N3:** C-Ter: GT<sup>N</sup>G AA<sup>N</sup>T CC<sup>N</sup> -Ac

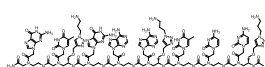

**DNA6-Bt:** 5'- CAC TTA GG- 3' 5'-Biotin modification

**PNA2-pc-ach:** C-Ter: GTG<sup>+</sup> AAT C<sup>+</sup>C -Ac

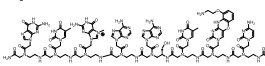

**PNA2-pc-H3:** C-Ter: GT<sup>H</sup>G<sup>+</sup> AA<sup>H</sup>T C<sup>+</sup>C<sup>H</sup> -Ac

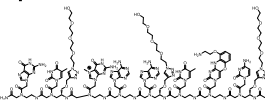

**PNA3-Bt:** C-Ter: GG ATT CAC-Lys(Bt)-Ac

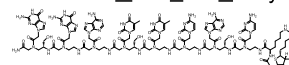

**PNA3-AAmm-Bt:** C-Ter: GG AAT CAC-Lys(Bt)-Ac  
A:A mismatch

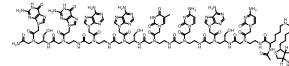

**PNA2-G3:** C-Ter: GT<sup>G</sup>G AA<sup>G</sup>T CC<sup>G</sup> -Ac

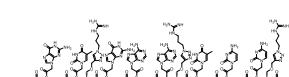

**PNA2-P3:** C-Ter: GT<sup>P</sup>G AA<sup>P</sup>T CC<sup>P</sup> -Ac

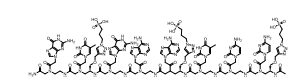

**DNA7-Bt:** 5'- CAC TAA GG- 3' 5'-Biotin modification /  
A:A mismatch

**DNA-8:** 5'- CC TAA GTG- 3'

**PNA2-pc-A1:** C-Ter: GTG<sup>+</sup> AA<sup>A</sup>T C<sup>+</sup>C -Ac

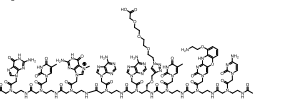

**PNA2-pc-A3:** C-Ter: GT<sup>A</sup>G<sup>+</sup> AA<sup>A</sup>T C<sup>+</sup>C<sup>A</sup> -Ac

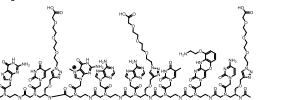

**Figure S1 continued.** Detailed structures of all PNA/DNA oligomers used in this work for FRET  $T_m$  and  $K_D$  measurements.

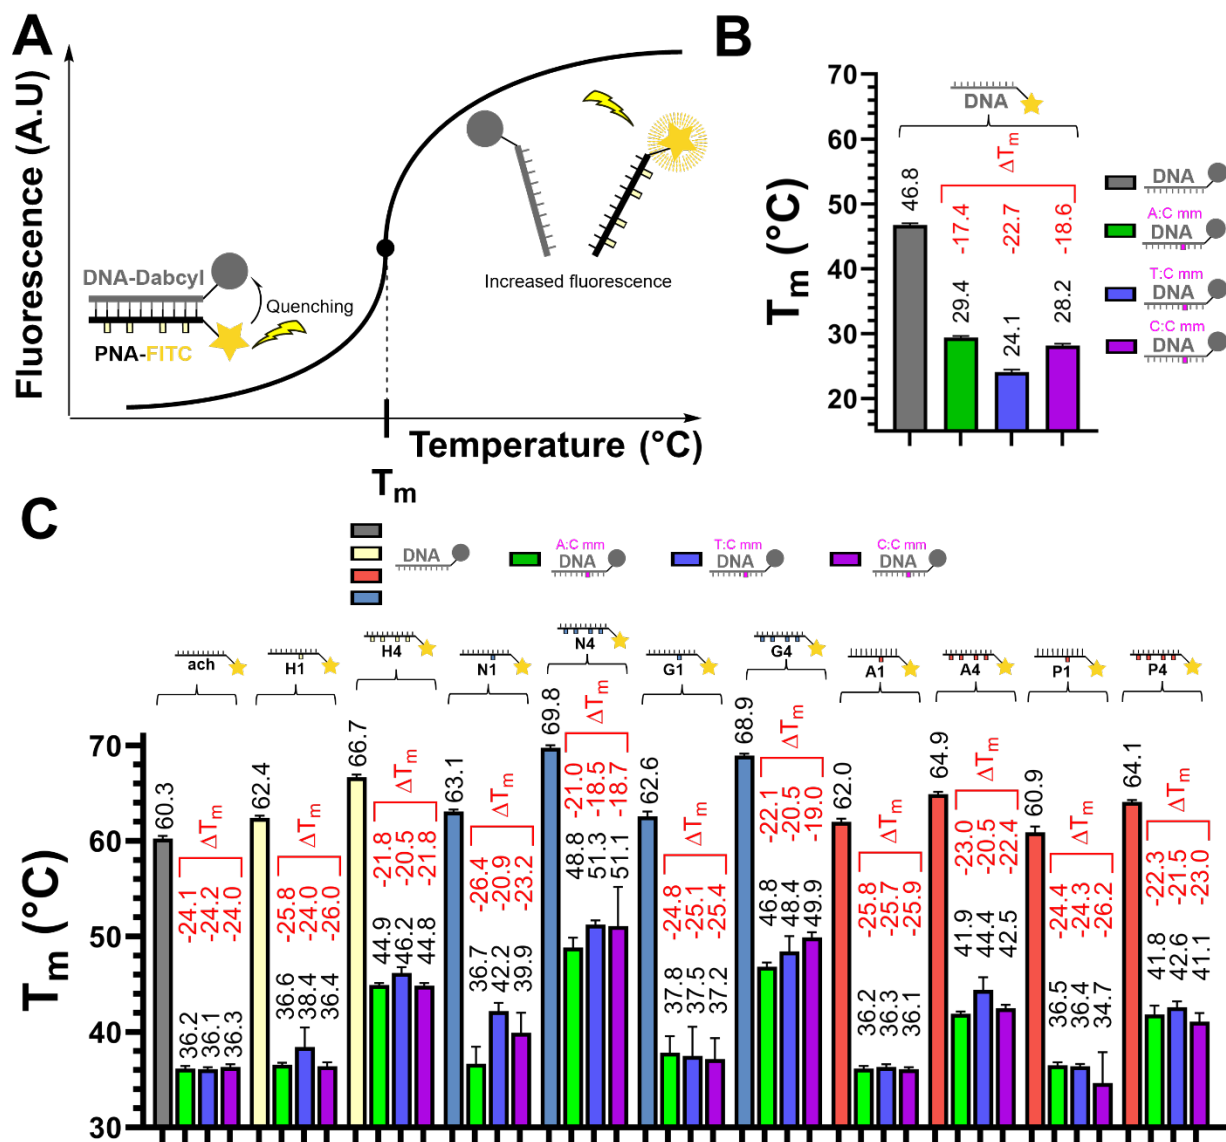

**Figure S2.** A) Scheme of the FRET melting temperature analysis curves for DNA labelled with Dabcyl quencher and PNA with FITC. B) Melting temperatures for DNA-DNA duplexes, perfect matched sequence versus A:Cmm, T:Cmm and C:Cmm. C) Melting temperatures for PNA-DNA duplexes, perfect matched sequence versus A:Cmm, T:Cmm and C:Cmm.

On chip

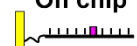

| PNA3-AAmm-Bt<br>A:A mm | $k_{on} \times 10^4$<br>( $M^{-1}s^{-1}$ ) | $k_{off} \times 10^{-3}$ ( $s^{-1}$ ) | $K_D$ (nM) |         | $k_{on} \times 10^4$<br>( $M^{-1}s^{-1}$ ) | $k_{off} \times 10^{-3}$ ( $s^{-1}$ ) | $K_D$ (nM) |
|------------------------|--------------------------------------------|---------------------------------------|------------|---------|--------------------------------------------|---------------------------------------|------------|
| PNA2-ach               | 3.0                                        | 2.1                                   | 71         | DNA8    | 4.9                                        | 258.2                                 | 5225       |
| PNA2-H1                | 1.4                                        | 2.0                                   | 147        | PNA2-H3 | 1.8                                        | 1.2                                   | 65         |
| PNA2-N3                | 1.4                                        | 1.2                                   | 80         | PNA2-A3 | 1.1                                        | 1.1                                   | 98         |
| PNA2-G3                | 2.6                                        | 1.2                                   | 44         | PNA2-P3 | 2.8                                        | 2.3                                   | 155        |

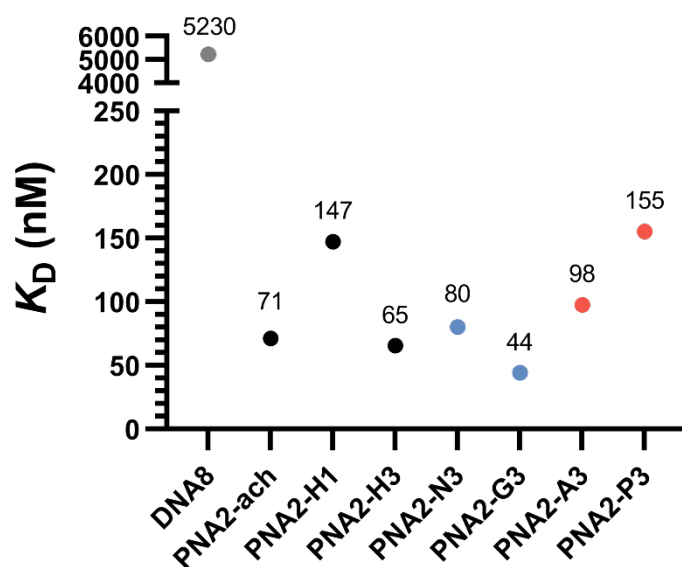

**Figure S3.** SPR dissociation equilibrium constants ( $K_D$ ), association rates ( $k_{on}$ ) and dissociation rates ( $k_{off}$ ) for PNAs for PNA3-AAmm-Bt immobilized on the chip.

**DNA6-Bt:** 5'-CAC TTA GG-3' 5'-Bt  
**DNA-8:** 5'-CC TAA GTG-3'  
**PNA2-ach:** C-Ter: GTG AAT CC-Ac

**PNA2-pc-ach:** C-Ter: GTG<sup>+</sup> AAT CC<sup>+</sup>-Ac  
**PNA2-pc-A1:** C-Ter: GTG<sup>+</sup> AA<sup>A</sup>T CC<sup>+</sup>-Ac  
**PNA2-pc-A3:** C-Ter: GT<sup>A</sup>G<sup>+</sup> AA<sup>A</sup>T C<sup>A</sup>C<sup>+</sup>-Ac  
**PNA2-pc-H3:** C-Ter: GT<sup>H</sup>G<sup>+</sup> AA<sup>H</sup>T C<sup>H</sup>C<sup>+</sup>-Ac

N-7-MeG (G<sup>+</sup>),  
 G-clamp (C<sup>+</sup>)

On chip

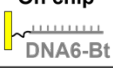

|             | $k_{on} \times 10^4$<br>(M <sup>-1</sup> s <sup>-1</sup> ) | $k_{off} \times 10^{-3}$ (s <sup>-1</sup> ) | $K_D$ (nM)  |            | $k_{on} \times 10^4$<br>(M <sup>-1</sup> s <sup>-1</sup> ) | $k_{off} \times 10^{-3}$ (s <sup>-1</sup> ) | $K_D$ (nM) |
|-------------|------------------------------------------------------------|---------------------------------------------|-------------|------------|------------------------------------------------------------|---------------------------------------------|------------|
| DNA8        | 39 ± 2                                                     | 329 ± 6                                     | 8600 ± 2000 | PNA2-pc-H3 | 7.9 ± 0.5                                                  | 2.79 ± 0.06                                 | 35 ± 2     |
| PNA2-ach    | 8.88 ± 0.01                                                | 113 ± 7                                     | 1280 ± 80   | PNA2-pc-A1 | 4.5 ± 0.2                                                  | 5.99 ± 0.01                                 | 135 ± 6    |
| PNA2-pc-ach | 38.8 ± 0.3                                                 | 18.68 ± 0.08                                | 48.1 ± 0.6  | PNA2-pc-A3 | 2.12 ± 0.09                                                | 2.55 ± 0.06                                 | 121 ± 5    |

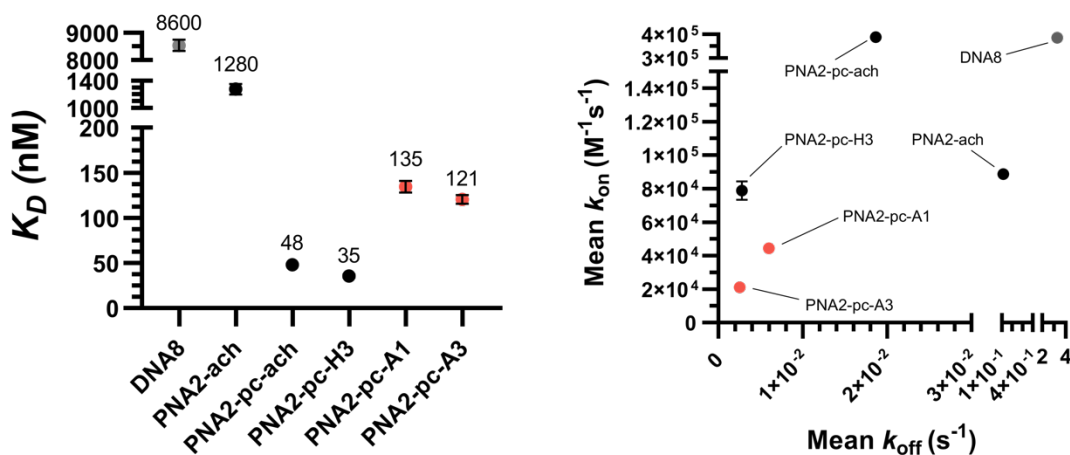

**Figure S4.** SPR dissociation equilibrium constants ( $K_D$ ), association rates ( $k_{on}$ ) and dissociation rates ( $k_{off}$ ) for pc-PNAs for **DNA6-Bt** immobilized on the chip. Data presented as the average of duplicate measurements ( $n = 2$ ) and reported as the mean ± 95% CI ( $z = 1.96$ ). Plotted error bars represent the standard deviation (SD).

## Abbreviations

|       |                                                          |
|-------|----------------------------------------------------------|
| AcN   | Acetonitrile                                             |
| Boc   | Tert-butyloxycarbonyl                                    |
| DCM   | Dichloromethane                                          |
| DHB   | 2,5-Dihydroxybenzoic acid                                |
| DIPEA | N,N-Diisopropylethylamine                                |
| DMF   | Dimethylformamide                                        |
| DMSO  | Dimethyl sulfoxide                                       |
| ESI   | Electrospray ionization                                  |
| EtOAc | Ethyl acetate                                            |
| FITC  | Fluorescein isothiocyanate                               |
| Fmoc  | Fluorenylmethoxycarbonyl                                 |
| HATU  | Hexafluorophosphate Azabenzotriazole Tetramethyl Uronium |
| HPLC  | High performance liquid chromatography                   |
| LC-MS | Liquid chromatography-mass spectrometry                  |
| MALDI | Matrix-assisted laser desorption/ionization              |
| MS    | Mass spectrometry                                        |
| PEG   | Polyethylene glycol                                      |
| PNA   | Peptide Nucleic Acid                                     |
| TEA   | Triethyl amine                                           |
| TFA   | Trifluoroacetic acid                                     |
| THF   | Tetrahydrofuran                                          |
| THPTA | Tris(3-hydroxypropyltriazolylmethyl)amine                |

## Synthesis of PNA oligomers

Synthesis of the reported PNA oligomers was performed starting from 5.0 mg of Fmoc-Rink-Amide PEG AM resin (0.33mmol/g, IrisBiotech) by iterative cycles of solid phase peptide synthesis following our previous reports.<sup>1,2</sup>

## Protocols for the synthesis of compounds Az-A/H/N/G/P

### 2-[2-[2-(2-Azidoethoxy)ethoxy]ethoxy]ethanol (Az-H)

Azido alcohol (Az-H) was synthesized according to the previous reported protocols.<sup>3</sup>

<sup>1</sup>H NMR (400 MHz, CDCl<sub>3</sub>): δ 3.87 (s, 1H), 3.70 – 3.66 (m, 2H), 3.64 – 3.60 (m, 12H), 3.60 – 3.53 (m, 2H), 3.35 (t, *J* = 5.1, 5.1 Hz, 2H).

### 2-[2-[2-(2-Azidoethoxy)ethoxy]ethoxy]acetic acid (Az-A)

Azido acetic acid (Az-A) was synthesized according to previous reported protocols.<sup>3</sup>

<sup>1</sup>H NMR (400 MHz, CDCl<sub>3</sub>): δ 9.69 (br. s, 1H), 4.15 (s, 2H), 3.73 – 3.61 (m, 10H), 3.35 (t, *J* = 5.2, 5.2 Hz, 2H).

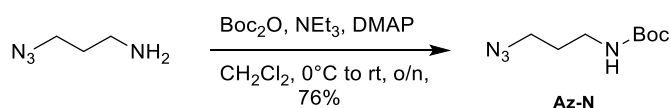

### Tert-butyl (3-azidopropyl)carbamate (Az-N)

To a stirred solution of 3-azidopropan-1-amine (400mg, 4 mmol, 1 eq) in CH<sub>2</sub>Cl<sub>2</sub> (5 mL) at 0°C, triethylamine (556 μL, 4 mmol, 1 eq) and 4-dimethylaminopyridine (24mg, 0.2 mmol, 0.05eq) were added. Then, di-tert-butyl dicarbonate (872 mg, 4 mmol, 1 eq) was added in one portion and the reaction mixture was left to warm to room temperature overnight. The reaction mixture was partitioned between Et<sub>2</sub>O (60 mL) and NH<sub>4</sub>Cl (sat.) (20 mL). The organic layer was separated, washed again with NH<sub>4</sub>Cl (sat.) (2 x 20 mL), brine, dried over anhydrous Na<sub>2</sub>SO<sub>4</sub>, filtered, and concentrated in vacuo. The resulting crude residue was purified by column chromatography (10-30% EtOAc/pentane) to give Az-N.

**Yield:** 611mg (76%). Isolated as a pale yellow oil. Spectroscopic data in accordance with previous reports.<sup>4</sup>

**R<sub>f</sub>:** 0.70 in 1/3 EtOAc/Pentane. UV inactive and stains yellow with KMnO<sub>4</sub> stain.

**HR-MS/TOF-MS-ES+:** *m/z* expected for [M+Na]<sup>+</sup>: 223.1171, *m/z* found: 223.1181

<sup>1</sup>H NMR (300 MHz, CDCl<sub>3</sub>): δ 4.66 (br. s, 1H), 3.35 (t, *J* = 6.7 Hz, 2H), 3.26 – 3.15 (m, 2H), 1.76 (p, *J* = 6.7 Hz, 2H), 1.44 (s, 9H).

<sup>13</sup>C NMR (75 MHz, CDCl<sub>3</sub>): δ 156.1, 79.6, 49.3, 38.2, 29.4, 28.5.



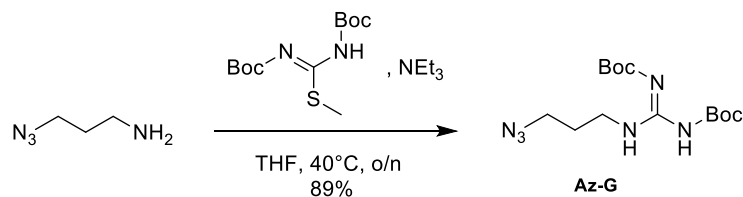

### N<sup>2</sup>, N<sup>3</sup>-Bis(tert-butoxycarbonyl)-N<sup>1</sup>-(3-azidopropyl)guanidine (Az-G)

To a stirred solution of N,N'-Di-Boc-S-methylisothiourea (300 mg, 1.03 mmol, 1 eq) in THF (3.2 mL) at room temperature, a solution of 3-azidopropan-1-amine (258 mg, 2.58 mmol, 2.5 eq) and triethylamine (430  $\mu$ L, 3.09 mmol, 3 eq) in THF (2 mL) were added. The reaction mixture was left to stir at 40°C overnight. Then, concentrated in vacuo and the resulting crude residue was purified by column chromatography (10% EtOAc/pentane) to give **Az-G**.

**Yield:** 272mg (89%). Isolated as a white solid.

**R<sub>f</sub>:** 0.30 in 10% EtOAc/Pentane. UV inactive and stains yellow with KMnO<sub>4</sub> stain.

**HR-MS/TOF-MS-ES<sup>+</sup>:** *m/z* expected for [M+Na]<sup>+</sup>: 365.1913, *m/z* found: 365.1920

**<sup>1</sup>H NMR (300 MHz, CDCl<sub>3</sub>):**  $\delta$  11.48 (br. s, 1H), 8.42 (br. s, 1H), 3.51 (m, 2H), 3.38 (t, *J* = 6.8 Hz, 2H), 1.86 (p, *J* = 6.8 Hz, 2H), 1.49 (m, 18H).

**<sup>13</sup>C NMR (75 MHz, CDCl<sub>3</sub>):**  $\delta$  163.7, 156.4, 153.4, 83.4, 79.5, 49.3, 38.3, 28.6, 28.4, 28.2.

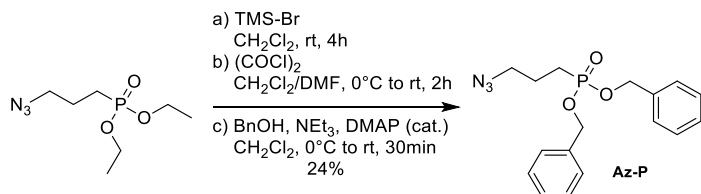

### Dibenzyl (3-azidopropyl)phosphonate (Az-P)

To a stirred solution of diethyl (3-azidopropyl)phosphonate (300 mg, 1.4 mmol, 1 eq) in CH<sub>2</sub>Cl<sub>2</sub> (1 mL) at room temperature, TMS-Br (648  $\mu$ L, 4.8 mmol, 3.5 eq) were added and stirred under N<sub>2</sub> atmosphere for 4h. Then, excess of TMS-Br removed by CH<sub>2</sub>Cl<sub>2</sub> co-evaporations (2 x 5 mL). The residual yellow oil was redissolved CH<sub>2</sub>Cl<sub>2</sub> (1.5 mL) with 2 drops of DMF. Cooled to 0°C and (COCl)<sub>2</sub> (908  $\mu$ L, 10.1 mmol, 7.4 eq) added dropwise under inert atmosphere (strong bubbling). The mixture was left to warm to room temperature for 2h before removing the excess (COCl)<sub>2</sub> by CH<sub>2</sub>Cl<sub>2</sub> co-evaporations (2 x 5 mL). The residual orange oil was redissolved in CH<sub>2</sub>Cl<sub>2</sub> (1 mL) and cooled to 0°, then a solution of benzyl alcohol (560  $\mu$ L, 5.4 mmol, 4 eq), 4-dimethylaminopyridine (17 mg, 0.1 mmol, 0.1 eq) and triethylamine (1.14 mL, 8.2 mmol, 6 eq) in CH<sub>2</sub>Cl<sub>2</sub> (1.5 mL) was dropwise added under inert atmosphere (strong exotherm). The reaction mixture was left to warm to room temperature for 30min, partitioned between Et<sub>2</sub>O (60 mL) and NH<sub>4</sub>Cl (sat.) (20 mL). The organic layer was separated, washed again with NH<sub>4</sub>Cl (sat.) (2 x 20 mL), water (1 x 20 mL), 1M NaOH (3 x 20 mL), brine, dried over anhydrous Na<sub>2</sub>SO<sub>4</sub>, filtered, and concentrated in vacuo. The resulting crude residue was purified by column chromatography (10-30% acetone/pentane) to give **Az-p**.

**Yield:** 121mg (24%). Isolated as a pale yellow oil.

**R<sub>f</sub>:** 0.60 in 30% acetone/pentane. UV active and stains yellow with KMnO<sub>4</sub> stain.

**HR-MS/TOF-MS-ES<sup>+</sup>:** *m/z* expected for [M+Na]<sup>+</sup>: 368.1140, *m/z* found: 368.1147

<sup>1</sup>H NMR (400 MHz, CDCl<sub>3</sub>): δ 7.42 – 7.29 (m, 10H), 5.10 – 4.92 (m, 4H), 3.43 – 3.19 (m, 2H), 2.24 – 1.67 (m, 4H).

<sup>13</sup>C NMR (101 MHz, CDCl<sub>3</sub>): δ 136.4, 136.4, 128.8, 128.7, 128.1, 67.5, 67.4, 51.6, 51.4, 33.7, 33.5, 26.0, 25.9, 25.7, 24.3, 24.2, 22.7, 22.5, 22.4.

<sup>31</sup>P NMR (121 MHz, CDCl<sub>3</sub>): δ 34.8, 32.0 (major), 31.7.

## Characterisation of PNA oligomers

PNA1- ach-D: C-Ter: Lys(ACT GGG ATT CAC -Ac)-Dabcyl

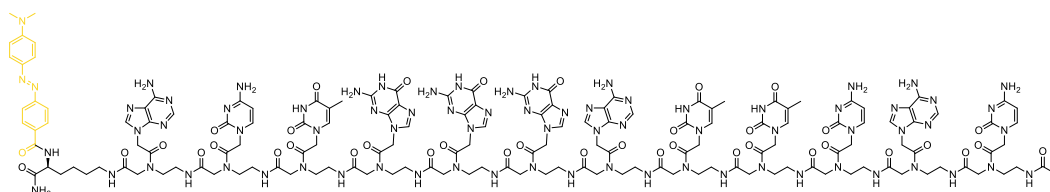

**Chemical Formula:** C<sub>152</sub>H<sub>189</sub>N<sub>75</sub>O<sub>39</sub> **Exact Mass:** 3688.511 **Molecular Weight:** 3690.670

**LC-MS-ESI+:**  $m/z$  expected for  $[M+6H]^{6+}$ : 616.1,  $m/z$  found: 616.2;  $m/z$  expected for  $[M+5H]^{5+}$ : 739.1,  $m/z$  found: 739.1;  $m/z$  expected for  $[M+4H]^{4+}$ : 923.6,  $m/z$  found: 923.4;  $m/z$  expected for  $[M+3H]^{3+}$ : 1231.2,  $m/z$  found: 1231.0.

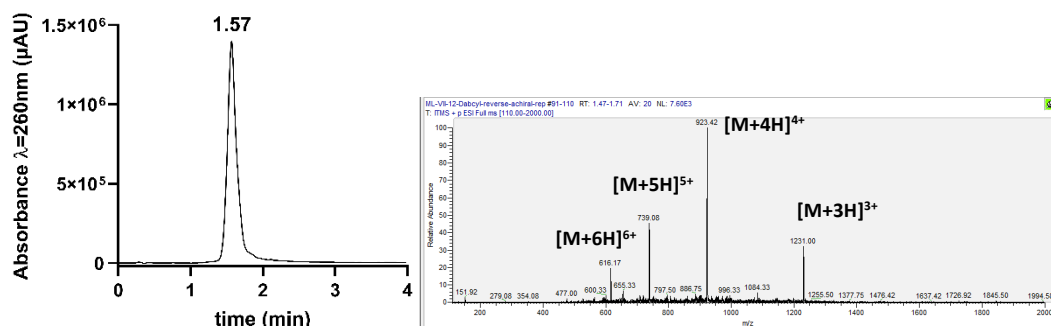

**MALDI-TOF-MS:**  $m/z$  expected for  $[M+H]^+$ : 3691.511,  $m/z$  found: 3692.187. In all PNAs containing Dabcyl quencher have a secondary peak with a -132  $m/z$  corresponding to a fragmentation of the quencher.

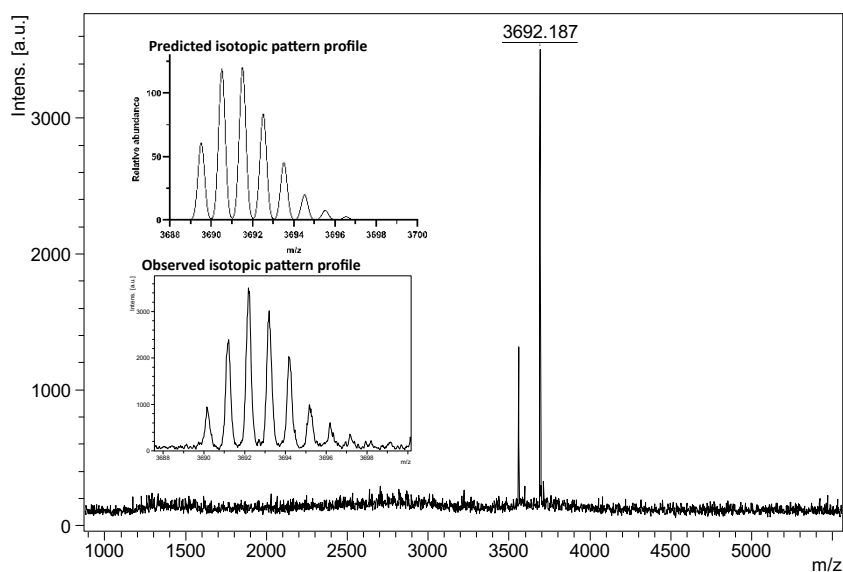

**PNA1-ach-F: C-Ter: GTG AAT CCC AGT-Lys(FITC)-Ac**

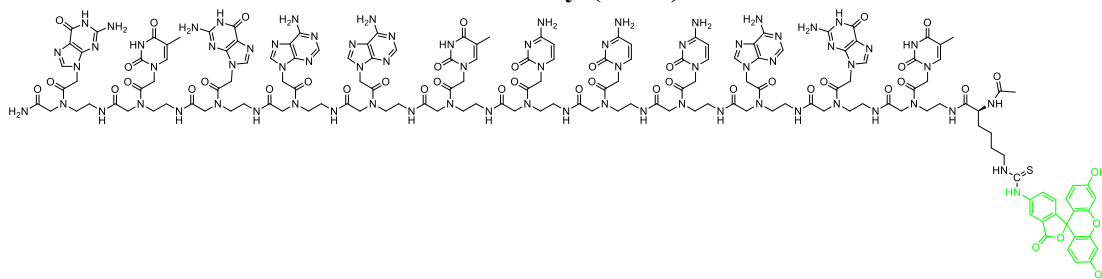

**Chemical Formula:** C<sub>158</sub>H<sub>187</sub>N<sub>73</sub>O<sub>43</sub>S **Exact Mass:** 3826.441 **Molecular Weight:** 3828.762

**LC-MS-ESI+:** *m/z* expected for [M+4H]<sup>4+</sup>: 958.1, *m/z* found: 958.3; *m/z* expected for [M+3H]<sup>3+</sup>: 1277.2, *m/z* found: 1277.3; *m/z* expected for [M+2H]<sup>2+</sup>: 1915.2, *m/z* found: 1914.7. (0.1% aqueous TFA solution and 0.1% TFA in HPLC grade acetonitrile used as eluents.)

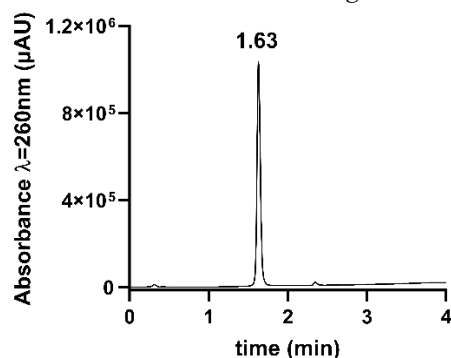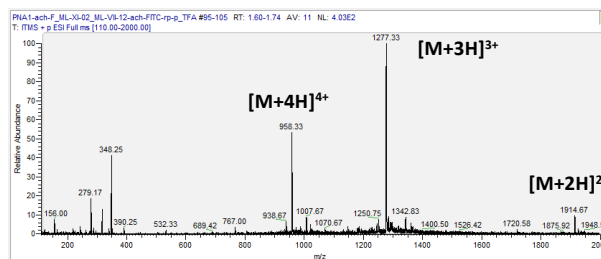

**MALDI-TOF-MS:** *m/z* expected for [M+H]<sup>+</sup>: 3829.438, *m/z* found: 3830.111

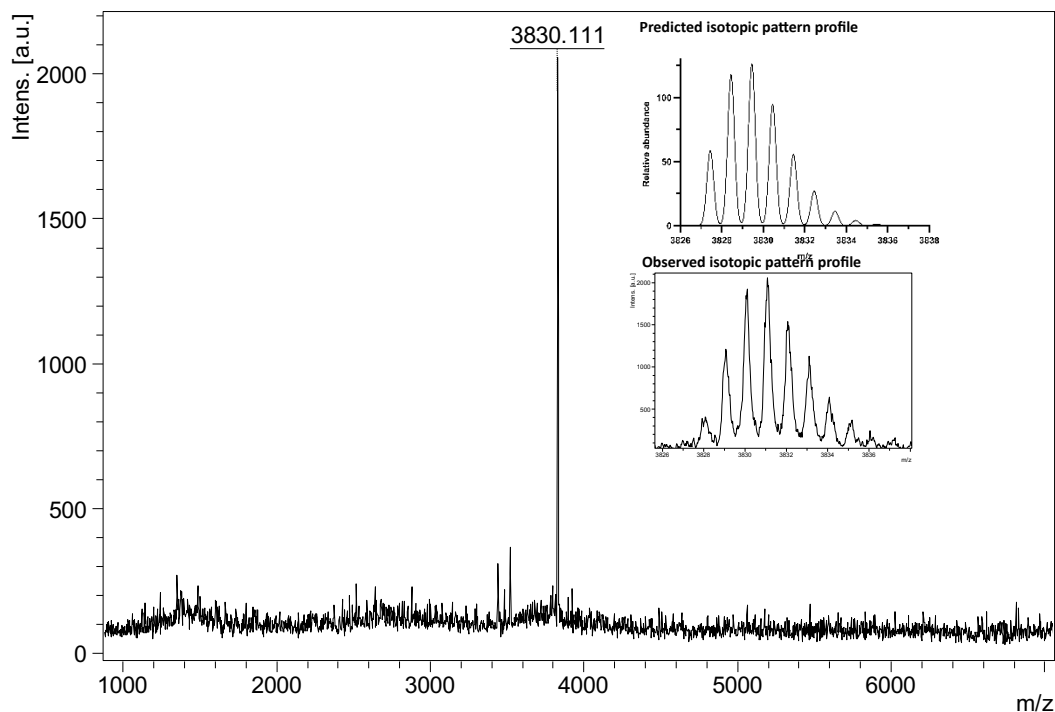

## PNA1-H1-D: C-Ter: Lys(ACT GG<sup>H</sup>G ATT CAC -Ac)-Dabcyl

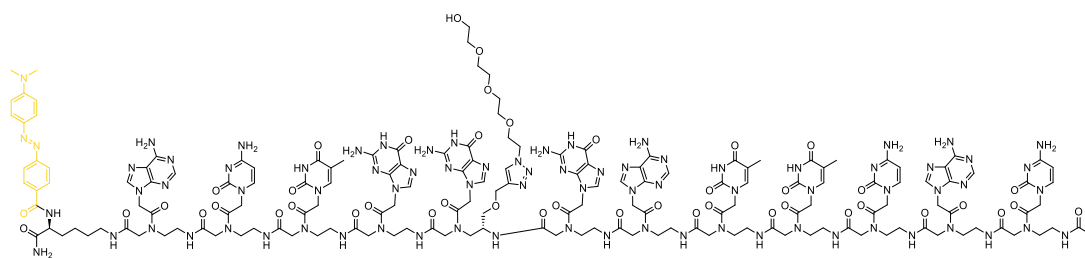

**Chemical Formula:** C<sub>164</sub>H<sub>210</sub>N<sub>78</sub>O<sub>44</sub> **Exact Mass:** 3975.659 **Molecular Weight:** 3977.986

**LC-MS-ESI+:**  $m/z$  expected for  $[M+6H]^{6+}$ : 664.0,  $m/z$  found: 664.2;  $m/z$  expected for  $[M+5H]^{5+}$ : 796.5,  $m/z$  found: 796.7;  $m/z$  expected for  $[M+4H]^{4+}$ : 995.4,  $m/z$  found: 995.4;  $m/z$  expected for  $[M+3H]^{3+}$ : 1326.9,  $m/z$  found: 1326.9.

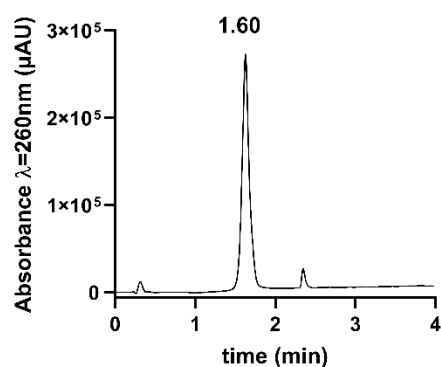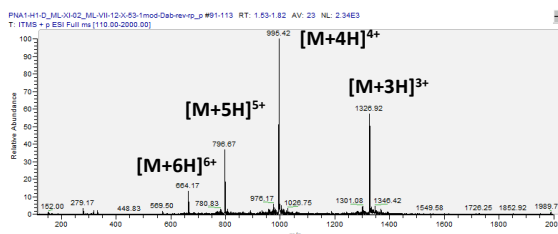

**MALDI-TOF-MS:**  $m/z$  expected for  $[M+Na]^+$ : 4000.656  $m/z$  found: 4001.175. In all PNAs containing Dabcyl quencher have a secondary peak with a -132  $m/z$  corresponding to a fragmentation of the quencher.

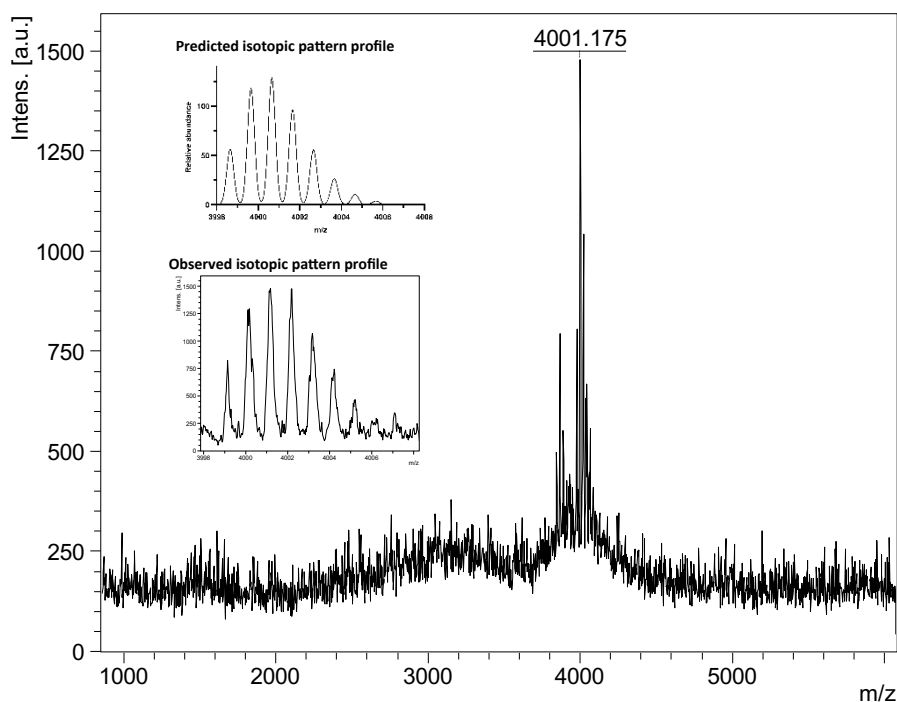

**PNA1-H1-F: C-Ter: GTG AAT CC<sup>H</sup>C AGT-Lys(FITC)-Ac**

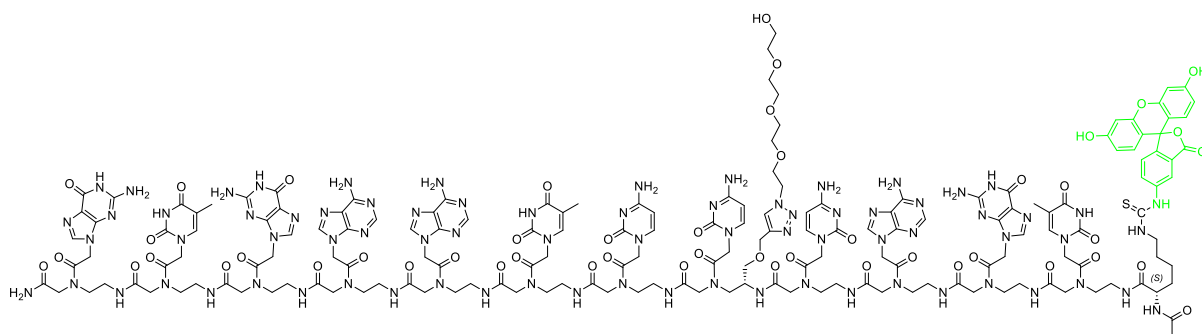

**Chemical Formula:** C<sub>170</sub>H<sub>208</sub>N<sub>76</sub>O<sub>48</sub>S **Exact Mass:** 4113.589 **Molecular Weight:** 4116.078

**LC-MS-ESI+:**  $m/z$  expected for  $[M+5H]^{5+}$ : 824.1,  $m/z$  found: 824.7;  $m/z$  expected for  $[M+4H]^{4+}$ : 1029.9,  $m/z$  found: 1030.1;  $m/z$  expected for  $[M+3H]^{3+}$ : 1372.9,  $m/z$  found: 1372.9. (0.1% aqueous TFA solution and 0.1% TFA in HPLC grade acetonitrile used as eluents.)

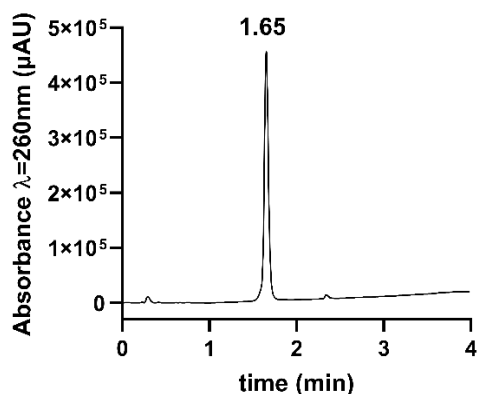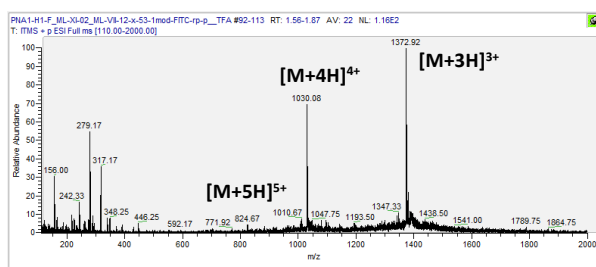

**MALDI-TOF-MS:**  $m/z$  expected for  $[M+H]^+$ : 4116.604,  $m/z$  found: 4116.239

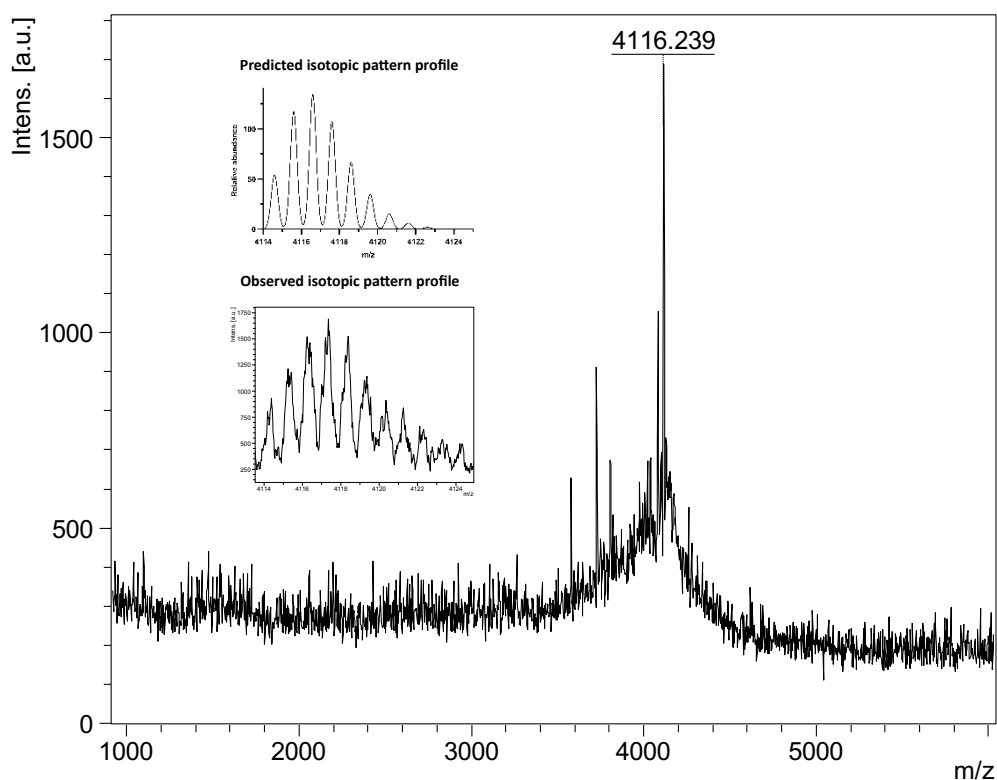

### PNA1-H4-D: C-Ter: Lys(AC<sup>H</sup>T GG<sup>H</sup>G AT<sup>H</sup>T CA<sup>H</sup>C -Ac)-Dabcyl

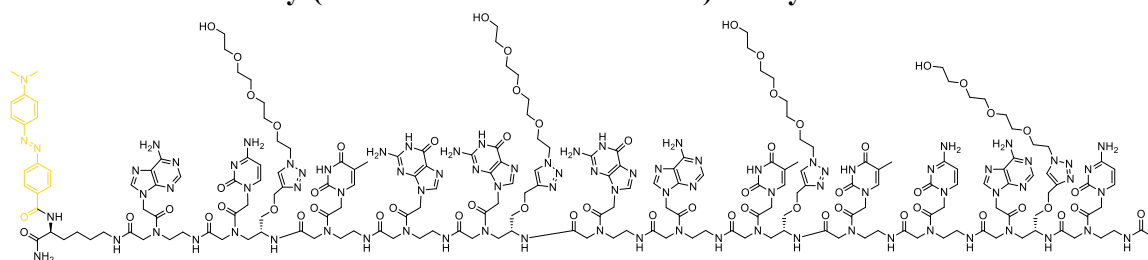

**Chemical Formula:** C<sub>200</sub>H<sub>273</sub>N<sub>87</sub>O<sub>59</sub> **Exact Mass:** 4837.104 **Molecular Weight:** 4839.934

**LC-MS-ESI+:**  $m/z$  expected for  $[M+6H]^{6+}$ : 807.5,  $m/z$  found: 807.8  $m/z$  expected for  $[M+5H]^{5+}$ : 968.8,  $m/z$  found: 968.9;  $m/z$  expected for  $[M+4H]^{4+}$ : 1210.8,  $m/z$  found: 1210.9;  $m/z$  expected for  $[M+3H]^{3+}$ : 1614.0,  $m/z$  found: 1613.9.

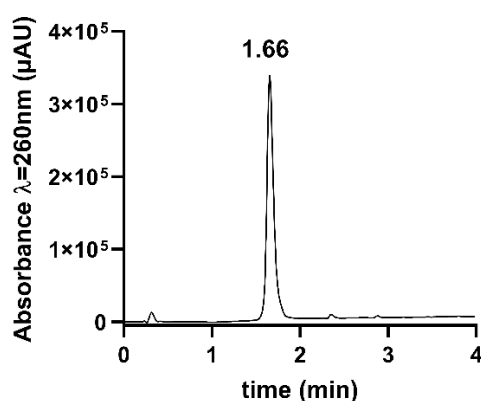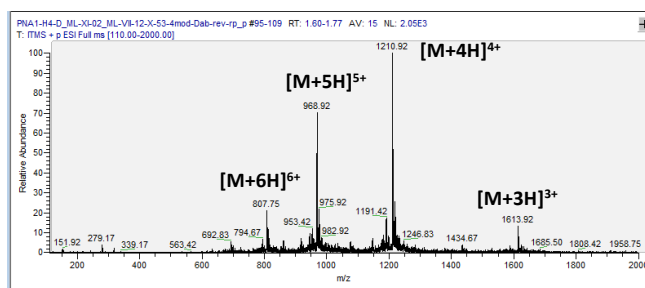

**MALDI-TOF-MS:**  $m/z$  expected for  $[M+H]^+$ : 4840.114,  $m/z$  found: 4840.054. In all PNAs containing Dabcyl quencher have a secondary peak with a -132  $m/z$  corresponding to a fragmentation of the quencher.

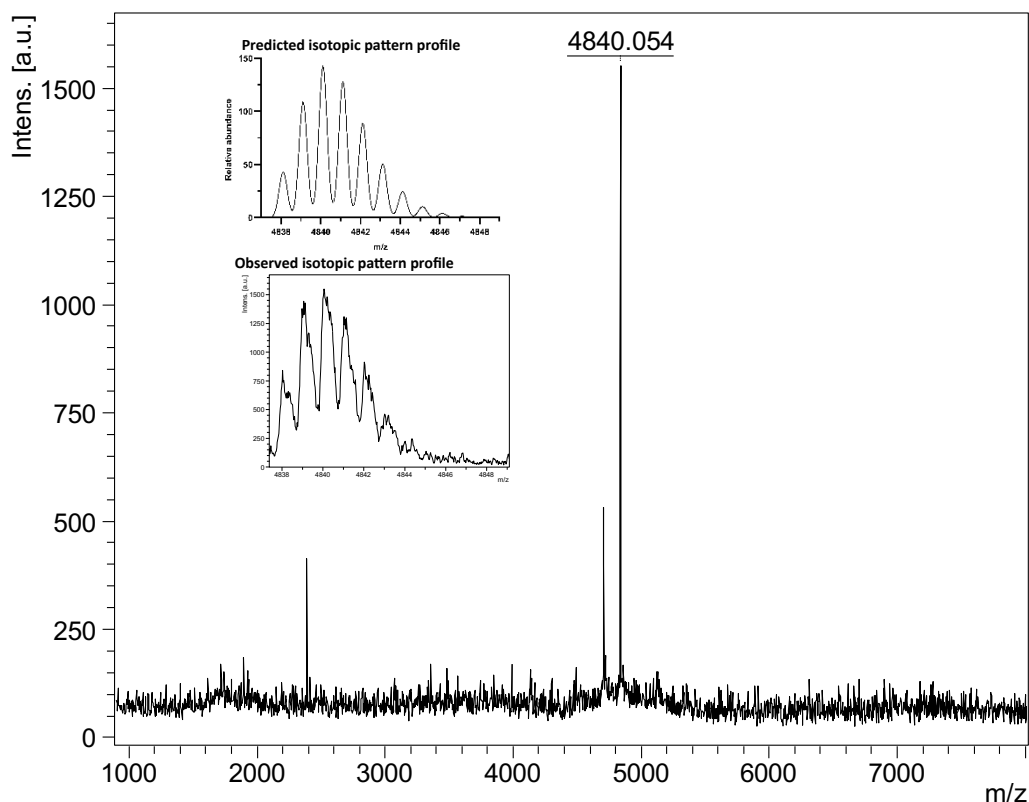

**PNA1-H4-F: C-Ter: GT<sup>H</sup>G AA<sup>H</sup>T CC<sup>H</sup>C AG<sup>H</sup>T-Lys(FITC)-Ac**

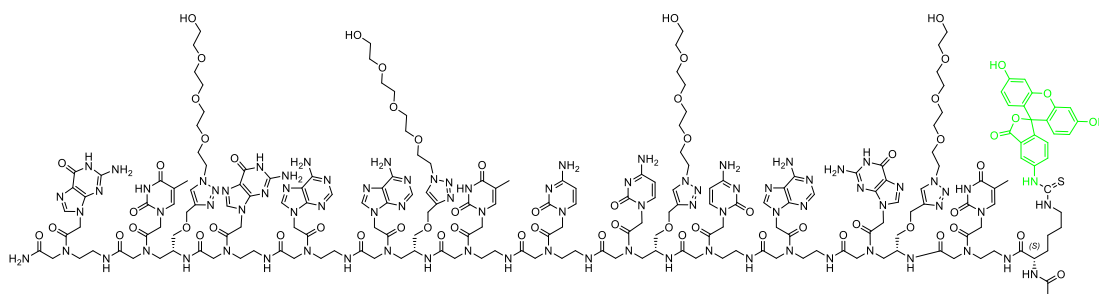

**Chemical Formula:** C<sub>206</sub>H<sub>271</sub>N<sub>85</sub>O<sub>63</sub>S **Exact Mass:** 4975.034 **Molecular Weight:** 4978.026

**LC-MS-ESI+:** *m/z* expected for [M+6H]<sup>6+</sup>: 830.5, *m/z* found: 830.5; *m/z* expected for [M+5H]<sup>5+</sup>: 996.4, *m/z* found: 996.5; *m/z* expected for [M+4H]<sup>4+</sup>: 1245.3, *m/z* found: 1245.4; *m/z* expected for [M+3H]<sup>3+</sup>: 1660.0, *m/z* found: 1660.3.

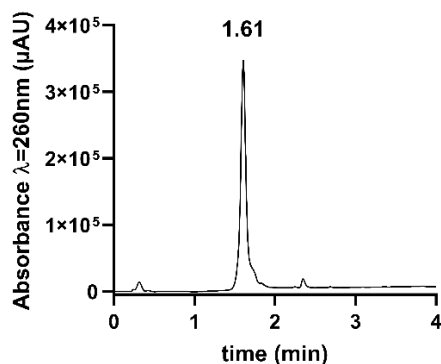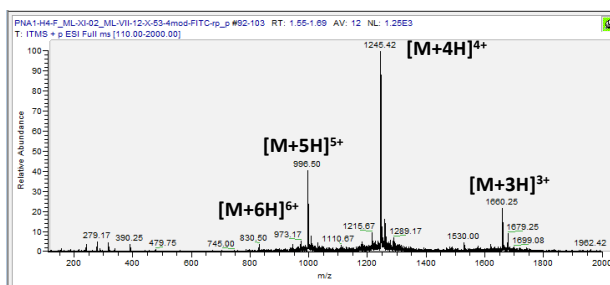

**HR-MS/TOF-MS-ES+:** *m/z* expected for [M+3H]<sup>3+</sup>: 1660.0208, *m/z* found: 1660.0006; *m/z* expected for [M+4H]<sup>4+</sup>: 1245.2675, *m/z* found: 1245.2483; *m/z* expected for [M+5H]<sup>5+</sup>: 996.4156, *m/z* found: 996.6104

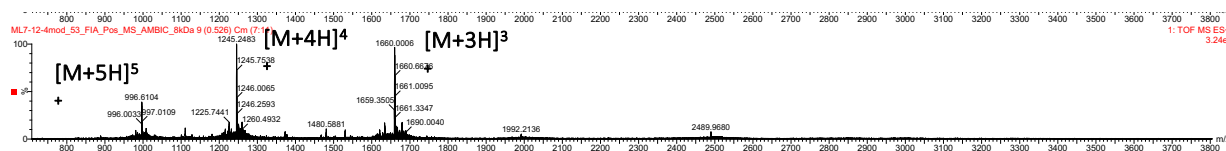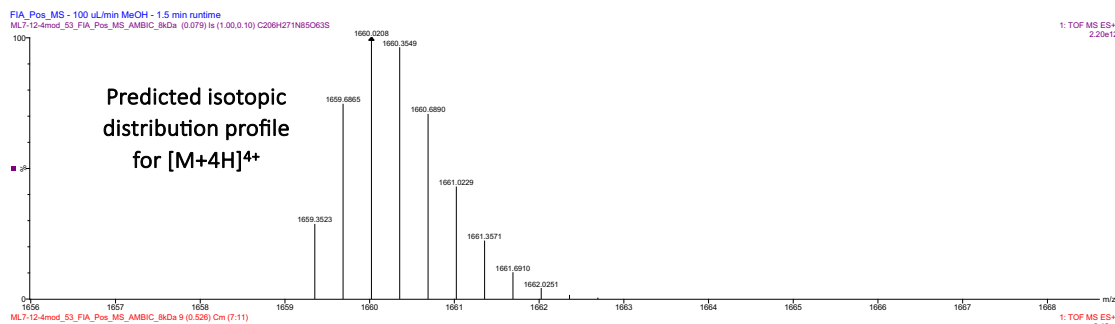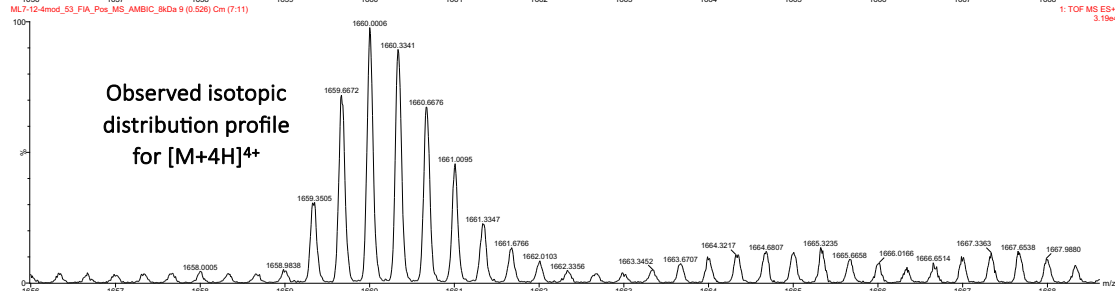

**PNA1-A1-D: C-Ter: Lys(ACT GG<sup>A</sup>G ATT CAC -Ac)-Dabcyl**

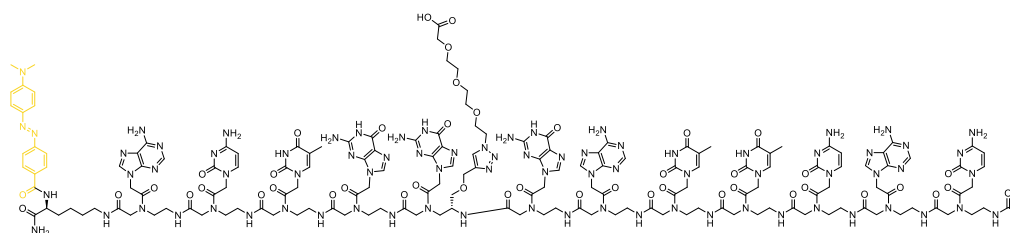

**Chemical Formula:** C<sub>164</sub>H<sub>208</sub>N<sub>78</sub>O<sub>45</sub> **Exact Mass:** 3989.639 **Molecular Weight:** 3991.969

**LC-MS-ESI+:**  $m/z$  expected for  $[M+6H]^{6+}$ : 666.3,  $m/z$  found: 666.4;  $m/z$  expected for  $[M+5H]^{5+}$ : 799.3,  $m/z$  found: 799.5;  $m/z$  expected for  $[M+4H]^{4+}$ : 998.9,  $m/z$  found: 990.0;  $m/z$  expected for  $[M+3H]^{3+}$ : 1331.6,  $m/z$  found: 1331.5.

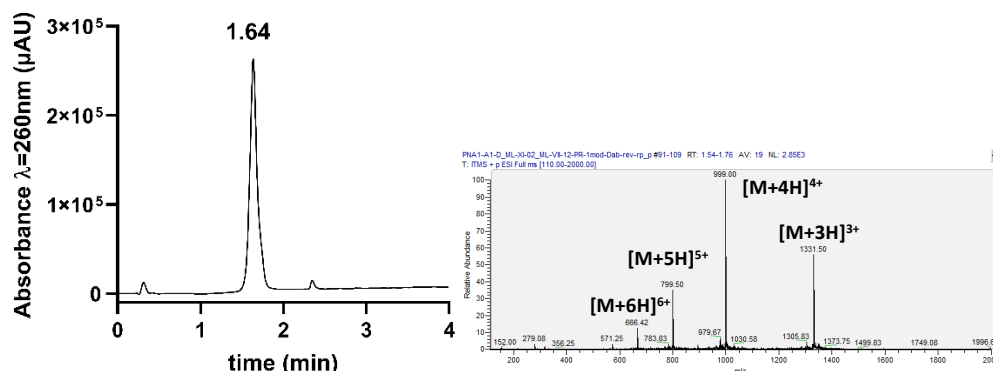

**MALDI-TOF-MS:**  $m/z$  expected for  $[M+\text{Na}]^+$ : 4014.641,  $m/z$  found: 4015.324. *In all PNAs containing Dabcyl quencher have a secondary peak with a -132  $m/z$  corresponding to a fragmentation of the quencher.*

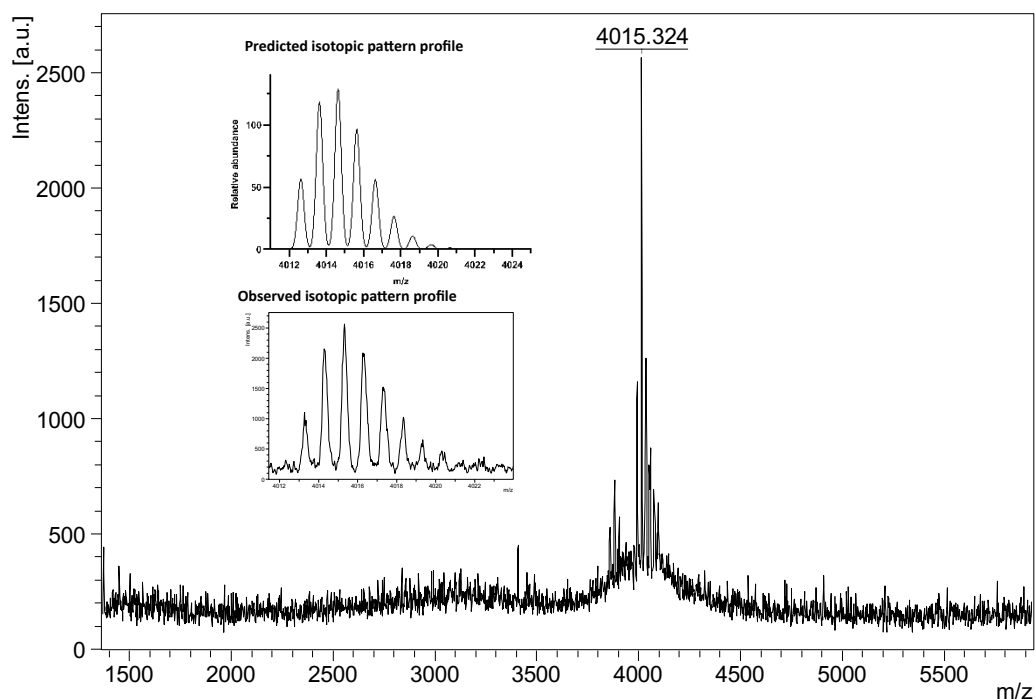



## PNA1-A1-F: C-Ter: GTG AAT CC<sup>A</sup> AGT-Lys(FITC)-Ac

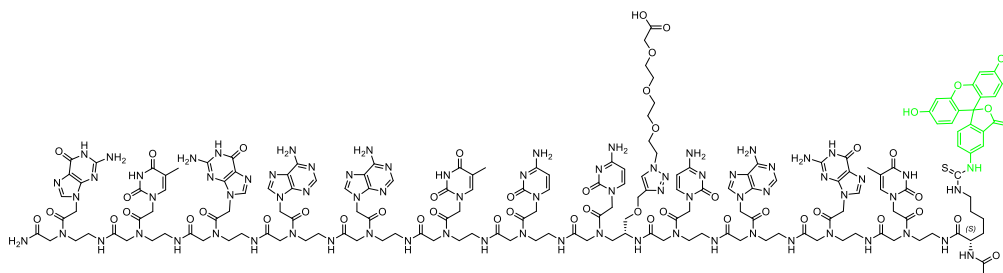

**Chemical Formula:** C<sub>170</sub>H<sub>206</sub>N<sub>76</sub>O<sub>49</sub>S **Exact Mass:** 4127.568 **Molecular Weight:** 4130.061

**LC-MS-ESI+:**  $m/z$  expected for  $[M+5H]^{5+}$ : 826.9,  $m/z$  found: 827.0;  $m/z$  expected for  $[M+4H]^{4+}$ : 1033.4,  $m/z$  found: 1033.5;  $m/z$  expected for  $[M+3H]^{3+}$ : 1377.5,  $m/z$  found: 1377.7. (0.1% aqueous TFA solution and 0.1% TFA in HPLC grade acetonitrile used as eluents.)

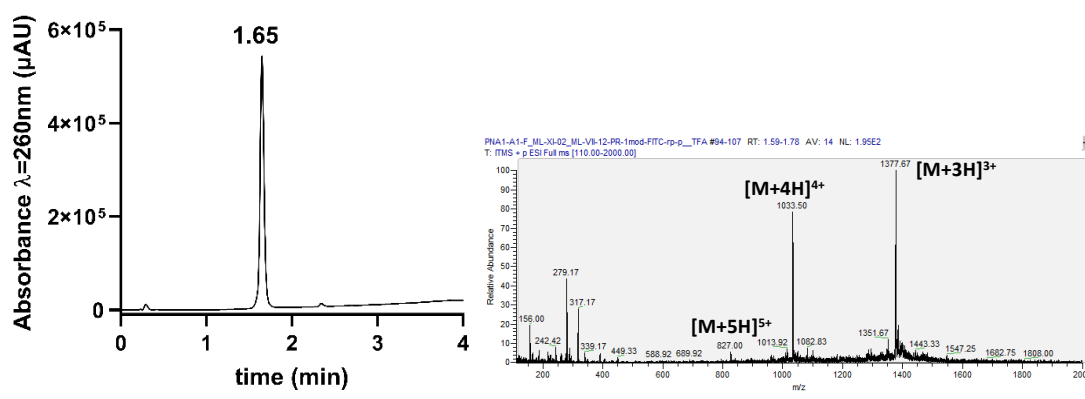

**MALDI-TOF-MS:**  $m/z$  expected for  $[M+H]^+$ : 4130.594,  $m/z$  found: 4130.669.

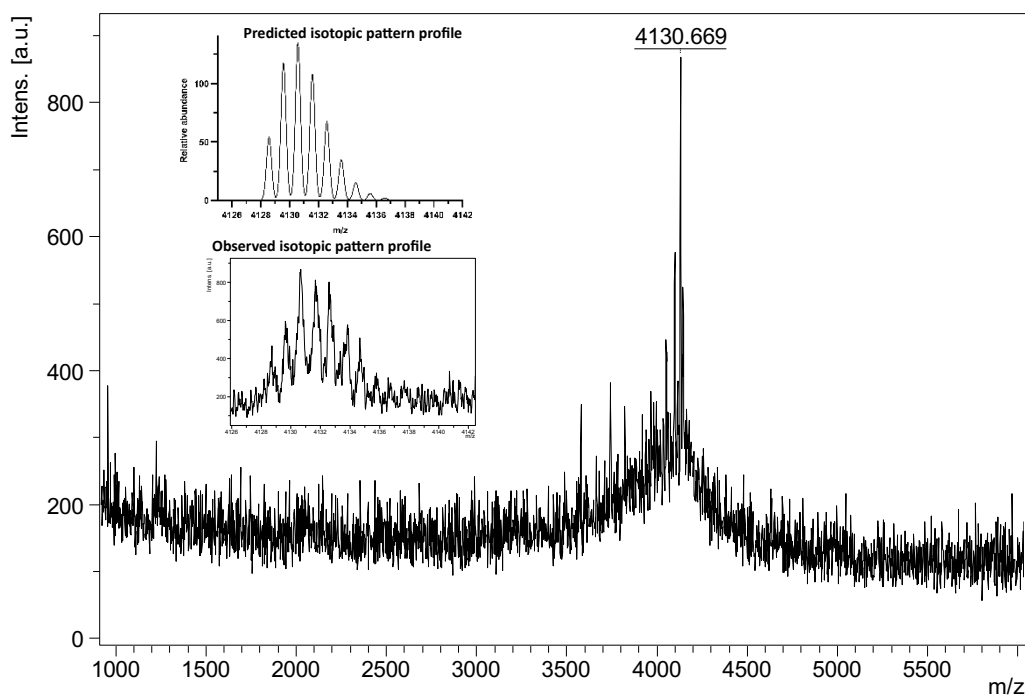



**MALDI-TOF-MS:**  $m/z$  expected for  $[M+H]^+$ : 4896.017,  $m/z$  found: 4896.514. In all PNAs containing Dabcyl quencher have a secondary peak with a  $-132 m/z$  corresponding to a fragmentation of the quencher.

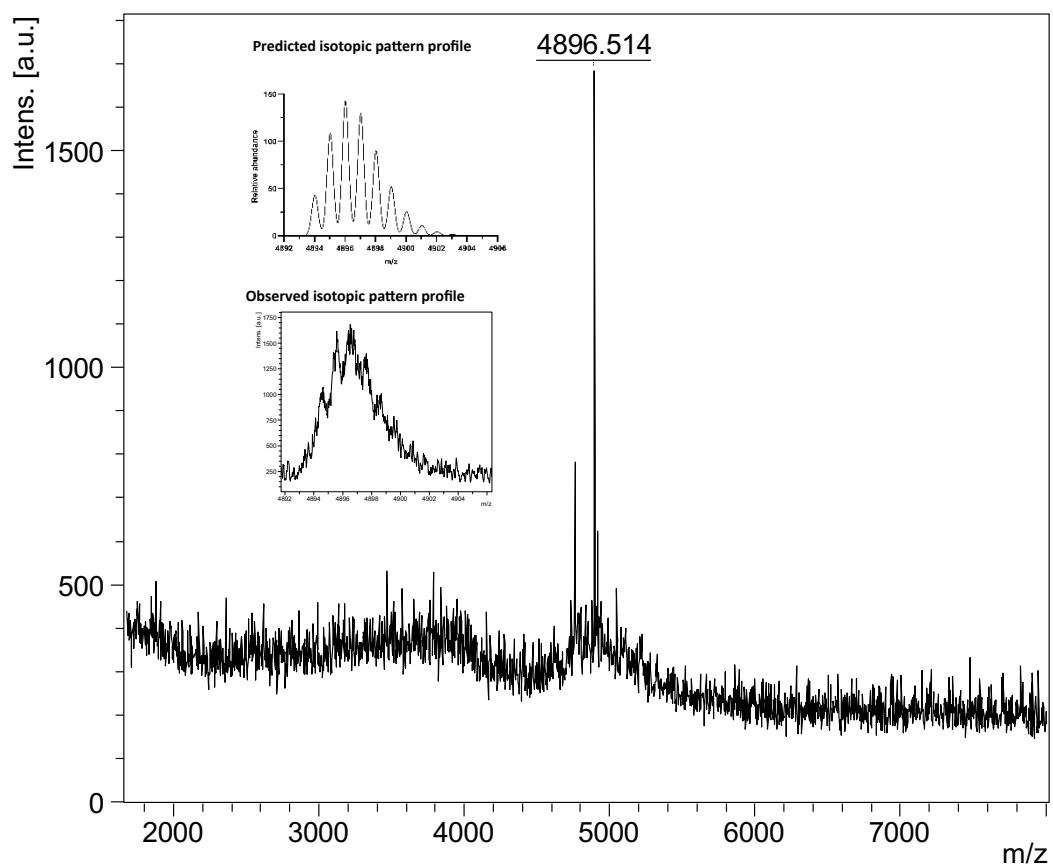

**PNA1-A4-F: C-Ter: GT<sup>A</sup>G AA<sup>A</sup>T CC<sup>A</sup>C AG<sup>A</sup>T-Lys(FITC)-Ac**

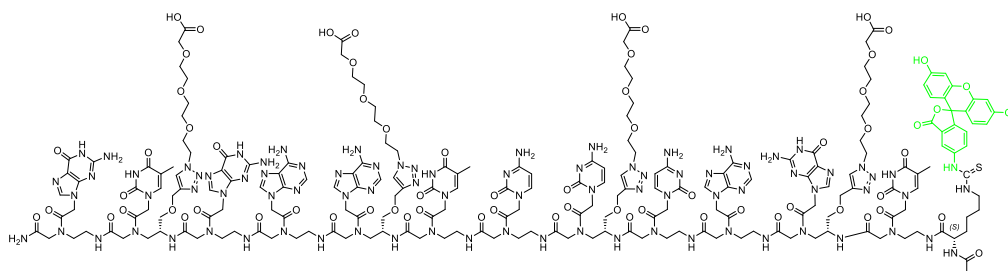

**Chemical Formula:** C<sub>206</sub>H<sub>263</sub>N<sub>85</sub>O<sub>67</sub>S **Exact Mass:** 5030.951 **Molecular Weight:** 5033.958

**LC-MS-ESI+:**  $m/z$  expected for  $[M+6H]^{6+}$ : 839.8,  $m/z$  found: 840.0  $m/z$  expected for  $[M+5H]^{5+}$ : 1007.6,  $m/z$  found: 1007.7;  $m/z$  expected for  $[M+4H]^{4+}$ : 1259.2,  $m/z$  found: 1259.3;  $m/z$  expected for  $[M+3H]^{3+}$ : 1678.7,  $m/z$  found: 1678.8. (0.1% aqueous TFA solution and 0.1% TFA in HPLC grade acetonitrile used as eluents.)

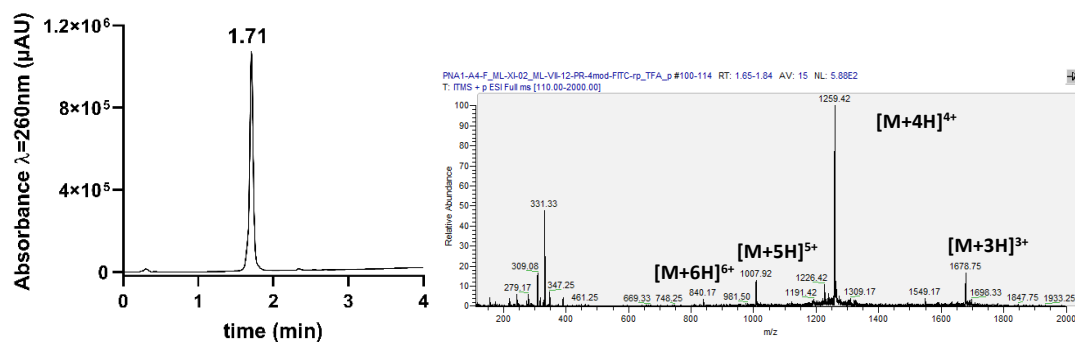

**HR-MS/TOF-MS-ES+:**  $m/z$  expected for  $[M+3H]^{3+}$ : 1678.6598,  $m/z$  found: 1678.6427;  $m/z$  expected for  $[M+4H]^{4+}$ : 1259.2467,  $m/z$  found: 1259.2367;  $m/z$  expected for  $[M+5H]^{5+}$ : 1007.5990,  $m/z$  found: 1007.5889

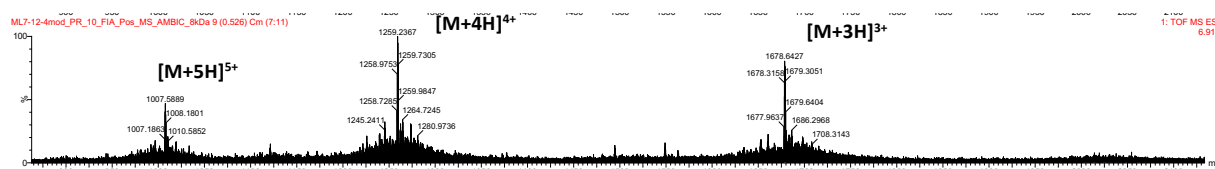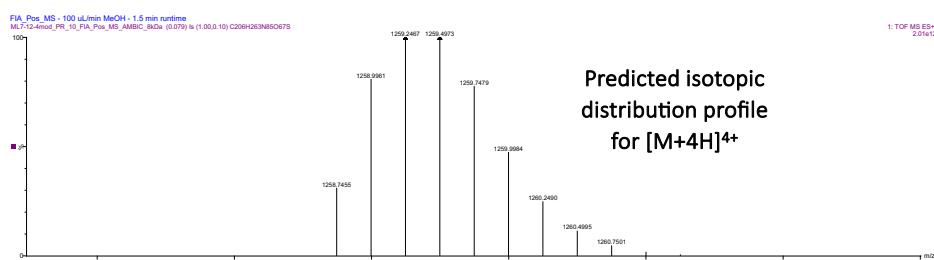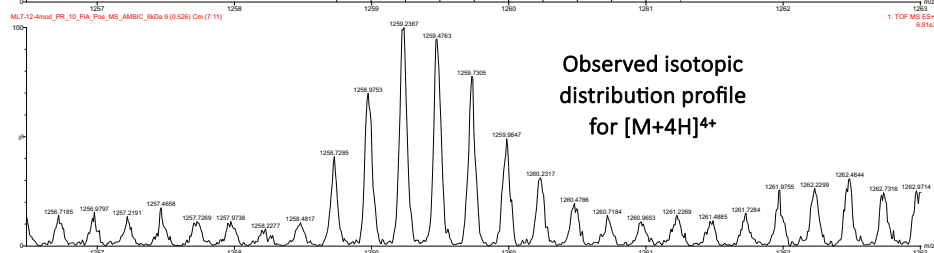

**PNA1-N1-D: C-Ter: Lys(ACT GG<sup>N</sup>G ATT CAC -Ac)-Dabcyl**

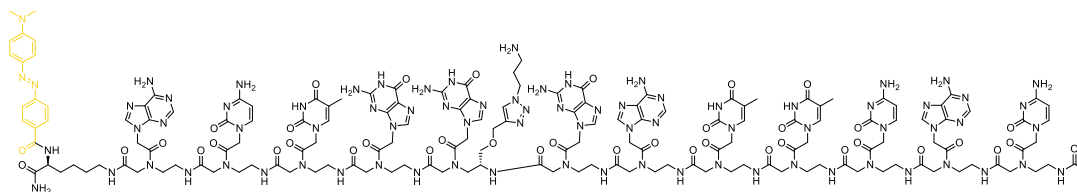

**Chemical Formula:** C<sub>159</sub>H<sub>201</sub>N<sub>79</sub>O<sub>40</sub> **Exact Mass:** 3856.612 **Molecular Weight:** 3858.870

**LC-MS-ESI+:**  $m/z$  expected for  $[M+6H]^{6+}$ : 644.1,  $m/z$  found: 644.2;  $m/z$  expected for  $[M+5H]^{5+}$ : 772.7,  $m/z$  found: 772.6;  $m/z$  expected for  $[M+4H]^{4+}$ : 965.7,  $m/z$  found: 965.5;  $m/z$  expected for  $[M+3H]^{3+}$ : 1287.1,  $m/z$  found: 1267.1.

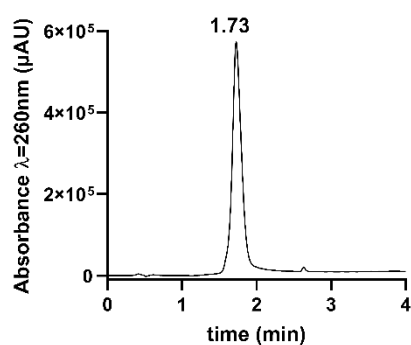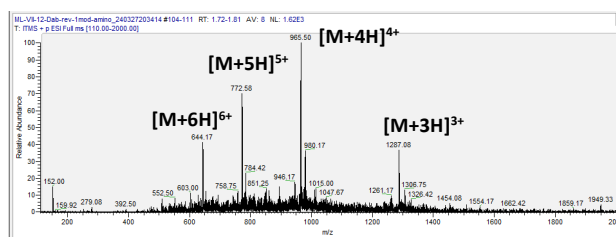

**MALDI-TOF-MS:**  $m/z$  expected for  $[M+H]^+$ : 3859.633,  $m/z$  found: 3860.161. In all PNAs containing Dabcyl quencher have a secondary peak with a -132  $m/z$  corresponding to a fragmentation of the quencher.

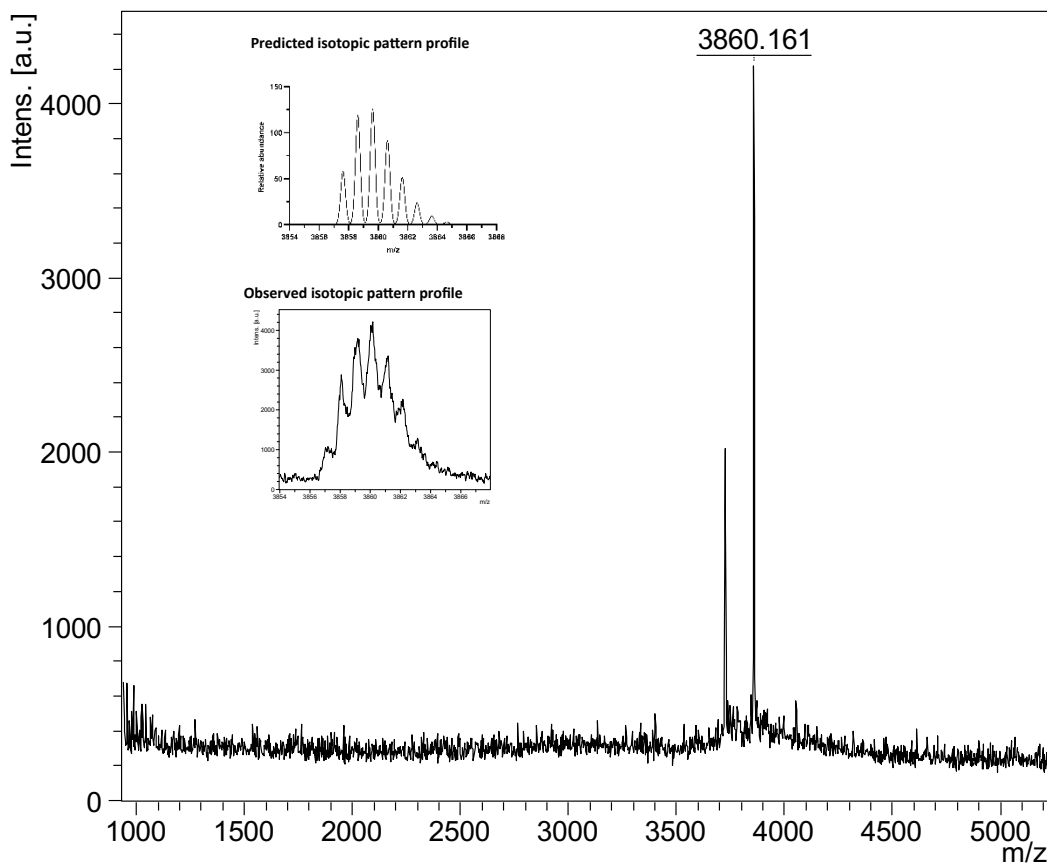

**PNA1-N1-F: C-Ter: GTG AAT CC<sup>N</sup>C AGT-Lys(FITC)-Ac**

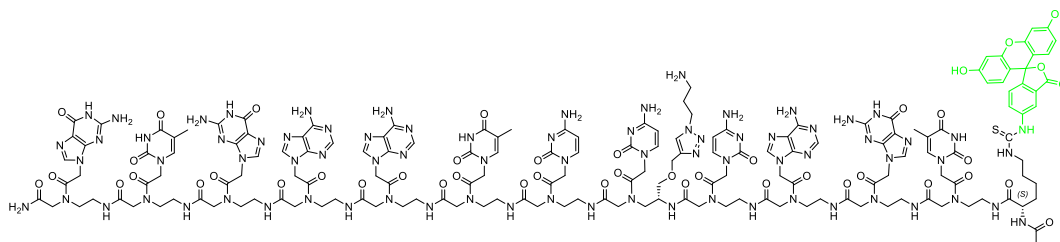

**Chemical Formula:** C<sub>165</sub>H<sub>199</sub>N<sub>77</sub>O<sub>44</sub>S **Exact Mass:** 3994.542 **Molecular Weight:** 3996.962

**LC-MS-ESI+:** *m/z* expected for [M+5H]<sup>5+</sup>: 800.3, *m/z* found: 800.4; *m/z* expected for [M+4H]<sup>4+</sup>: 1000.1, *m/z* found: 1000.2; *m/z* expected for [M+3H]<sup>3+</sup>: 1333.2, *m/z* found: 1333.2.

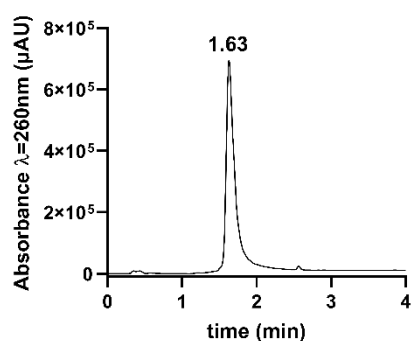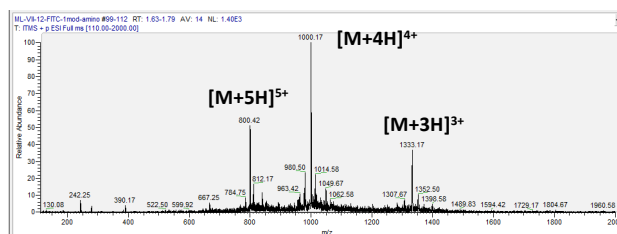

**MALDI-TOF-MS:** *m/z* expected for [M+H]<sup>+</sup>: 3997.550, *m/z* found: 3997.123.

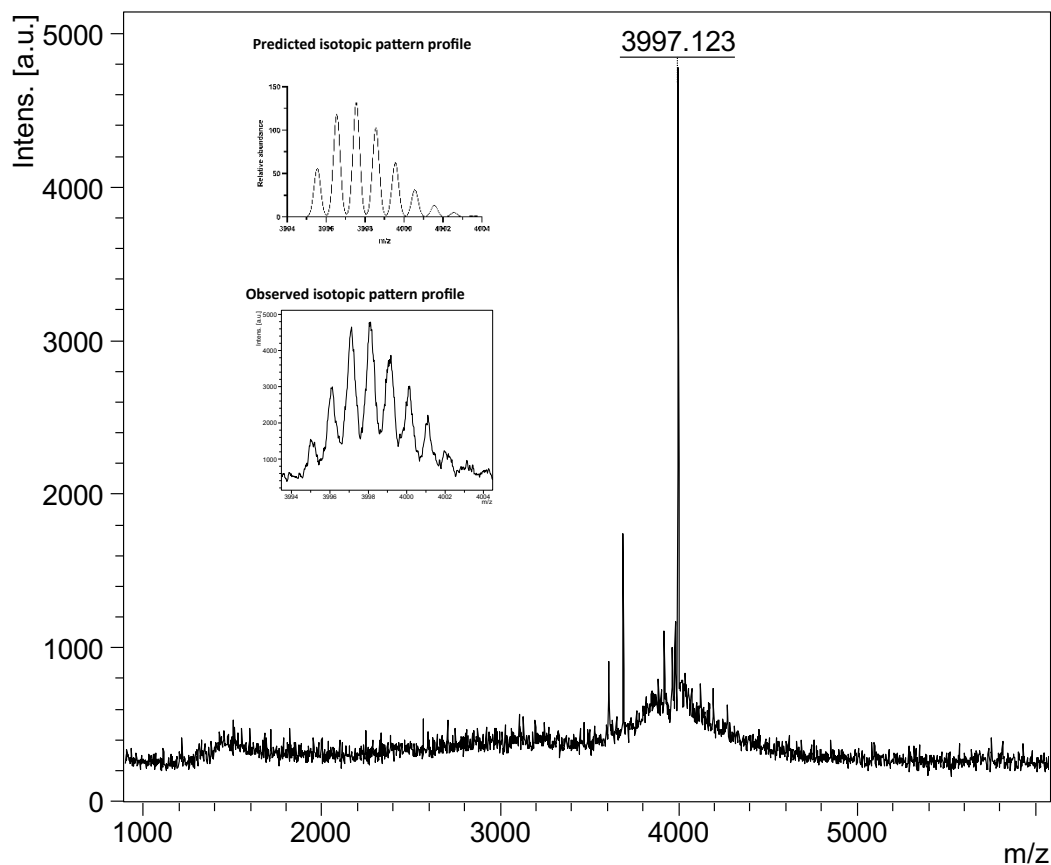

**PNA1-N4-D: C-Ter: Lys(AC<sup>N</sup>T GG<sup>N</sup>G AT<sup>N</sup>T CA<sup>N</sup>C -Ac)-Dabcyl**

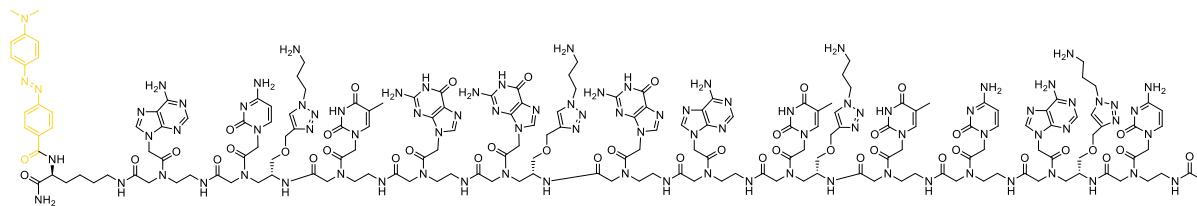

**Chemical Formula:** C<sub>180</sub>H<sub>237</sub>N<sub>91</sub>O<sub>43</sub> **Exact Mass:** 4360.916 **Molecular Weight:** 4363.470

**LC-MS-ESI+:**  $m/z$  expected for  $[M+7H]^{7+}$ : 624.3,  $m/z$  found: 624.4;  $m/z$  expected for  $[M+6H]^{6+}$ : 728.2,  $m/z$  found: 728.3;  $m/z$  expected for  $[M+5H]^{5+}$ : 873.6,  $m/z$  found: 873.8;  $m/z$  expected for  $[M+4H]^{4+}$ : 1091.7,  $m/z$  found: 1091.8.

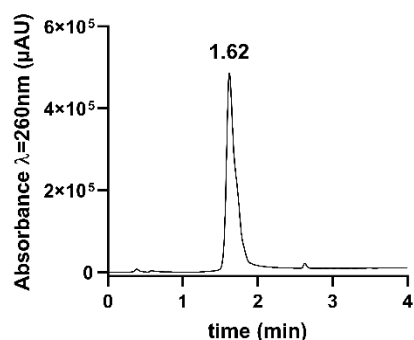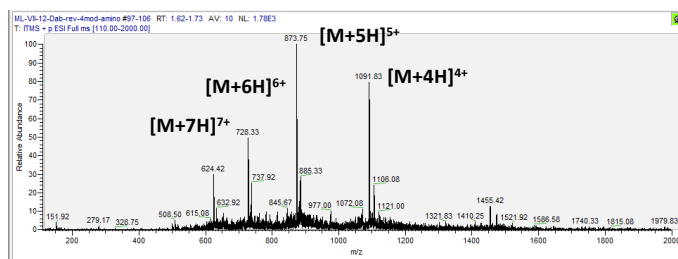

**MALDI-TOF-MS:**  $m/z$  expected for  $[M+H]^+$ : 4363.937,  $m/z$  found: 4363.583. *In all PNAs containing Dabcyl quencher have a secondary peak with a -132  $m/z$  corresponding to a fragmentation of the quencher.*

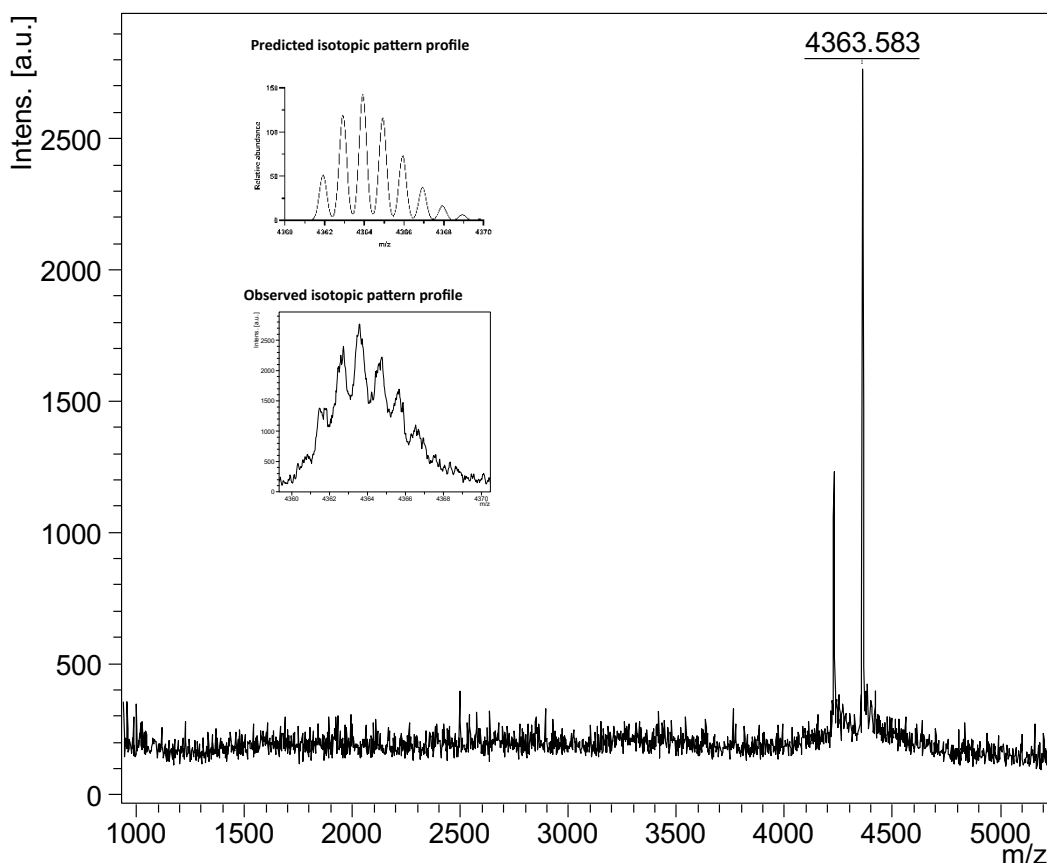

**PNA1-N4-F: C-Ter: GT<sup>N</sup>G AA<sup>N</sup>T CC<sup>N</sup>C AG<sup>N</sup>T-Lys(FITC)-Ac**

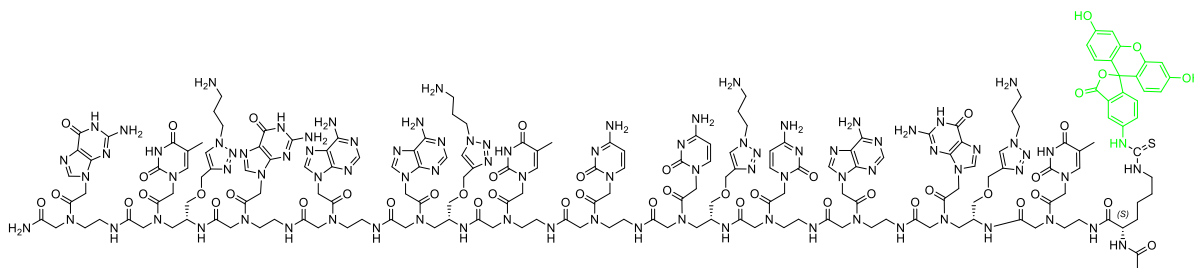

**Chemical Formula:** C<sub>186</sub>H<sub>235</sub>N<sub>89</sub>O<sub>47</sub>S **Exact Mass:** 4498.846 **Molecular Weight:** 4501.562

**LC-MS-ESI+:**  $m/z$  expected for  $[M+6H]^{6+}$ : 751.1,  $m/z$  found: 751.3;  $m/z$  expected for  $[M+5H]^{5+}$ : 901.2,  $m/z$  found: 901.3;  $m/z$  expected for  $[M+4H]^{4+}$ : 1126.2,  $m/z$  found: 1126.3;  $m/z$  expected for  $[M+3H]^{3+}$ : 1501.3,  $m/z$  found: 1501.3.

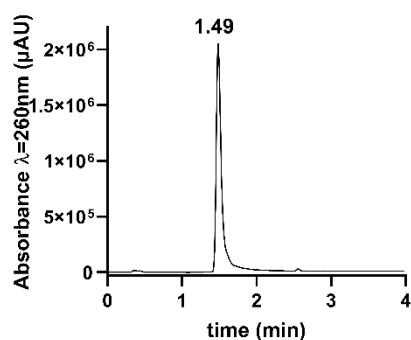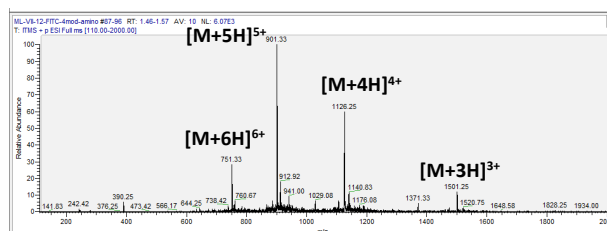

**MALDI-TOF-MS:**  $m/z$  expected for  $[M+H]^+$ : 4501.872,  $m/z$  found: 4501.810.

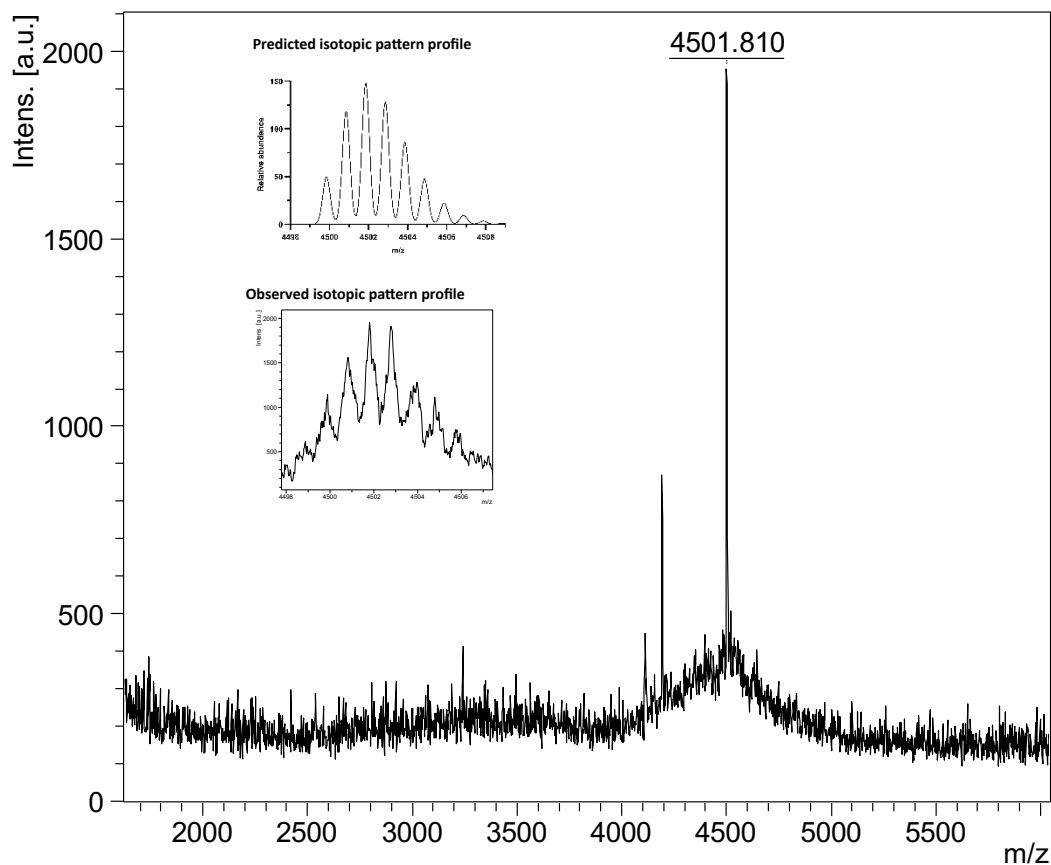



## PNA1-G1-D: C-Ter: Lys(ACT GG<sup>G</sup> ATT CAC -Ac)-Dabcyl

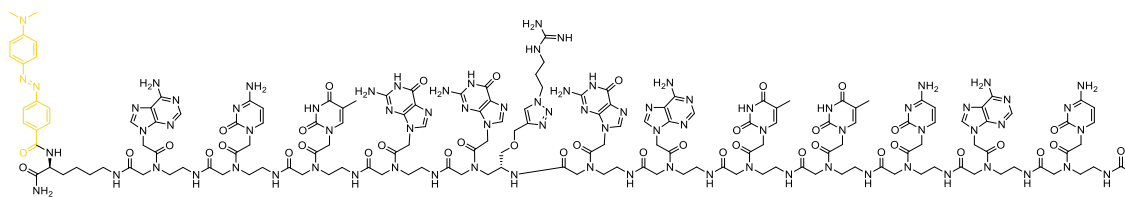

**Chemical Formula:** C<sub>160</sub>H<sub>203</sub>N<sub>81</sub>O<sub>40</sub> **Exact Mass:** 3898.634 **Molecular Weight:** 3900.911

**LC-MS-ESI+:**  $m/z$  expected for  $[M+6H]^{6+}$ : 651.1,  $m/z$  found: 651.2;  $m/z$  expected for  $[M+5H]^{5+}$ : 781.1,  $m/z$  found: 781.1;  $m/z$  expected for  $[M+4H]^{4+}$ : 976.2,  $m/z$  found: 976.2;  $m/z$  expected for  $[M+3H]^{3+}$ : 1031.2,  $m/z$  found: 1031.0.

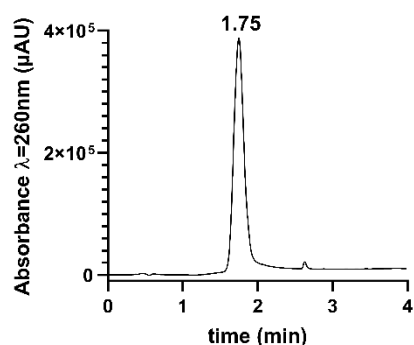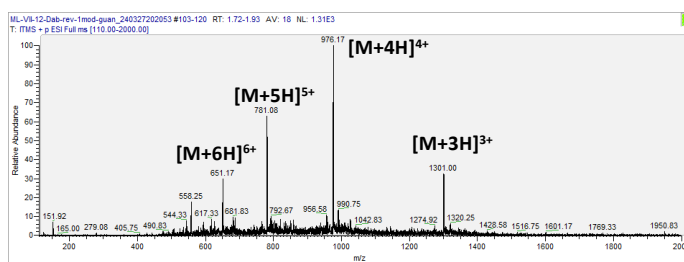

**MALDI-TOF-MS:**  $m/z$  expected for  $[M+H]^+$ : 3901.648,  $m/z$  found: 3901.030. In all PNAs containing Dabcyl quencher have a secondary peak with a -132  $m/z$  corresponding to a fragmentation of the quencher.

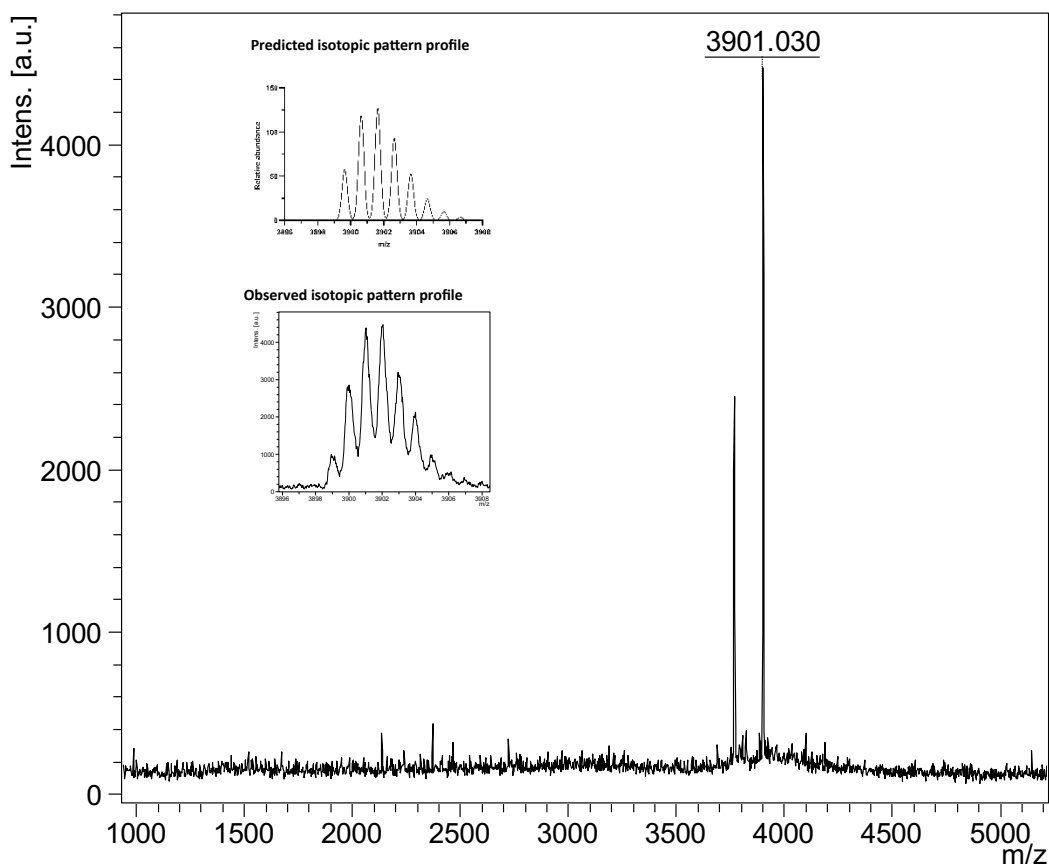

**PNA1-G1-F: C-Ter: GTG AAT CC<sup>G</sup>C AGT-Lys(FITC)-Ac**

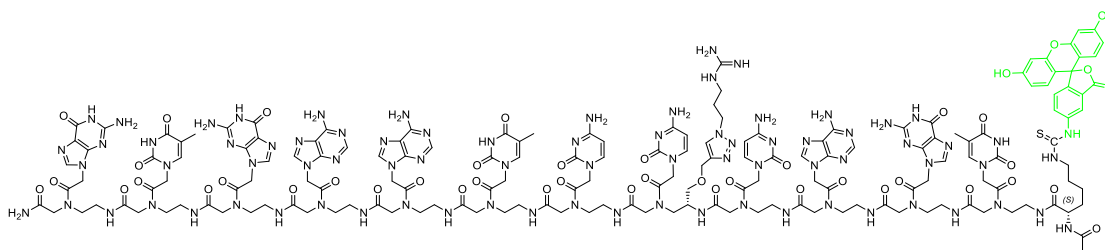

**Chemical Formula:** C<sub>166</sub>H<sub>201</sub>N<sub>79</sub>O<sub>44</sub>S **Exact Mass:** 4036.564 **Molecular Weight:** 4039.003

**LC-MS-ESI+:** *m/z* expected for [M+5H]<sup>5+</sup>: 808.7, *m/z* found: 808.8; *m/z* expected for [M+4H]<sup>4+</sup>: 1010.6, *m/z* found: 1010.7; *m/z* expected for [M+3H]<sup>3+</sup>: 1347.0, *m/z* found: 1347.0.

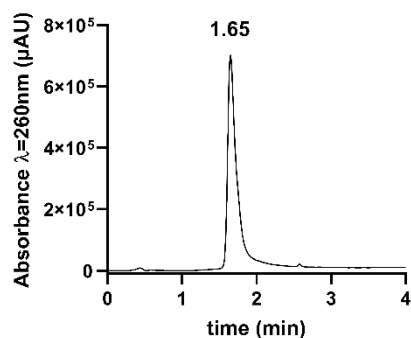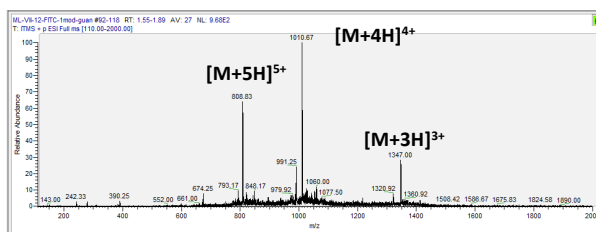

**MALDI-TOF-MS:** *m/z* expected for [M+H]<sup>+</sup>: 4039.563, *m/z* found: 4039.329.

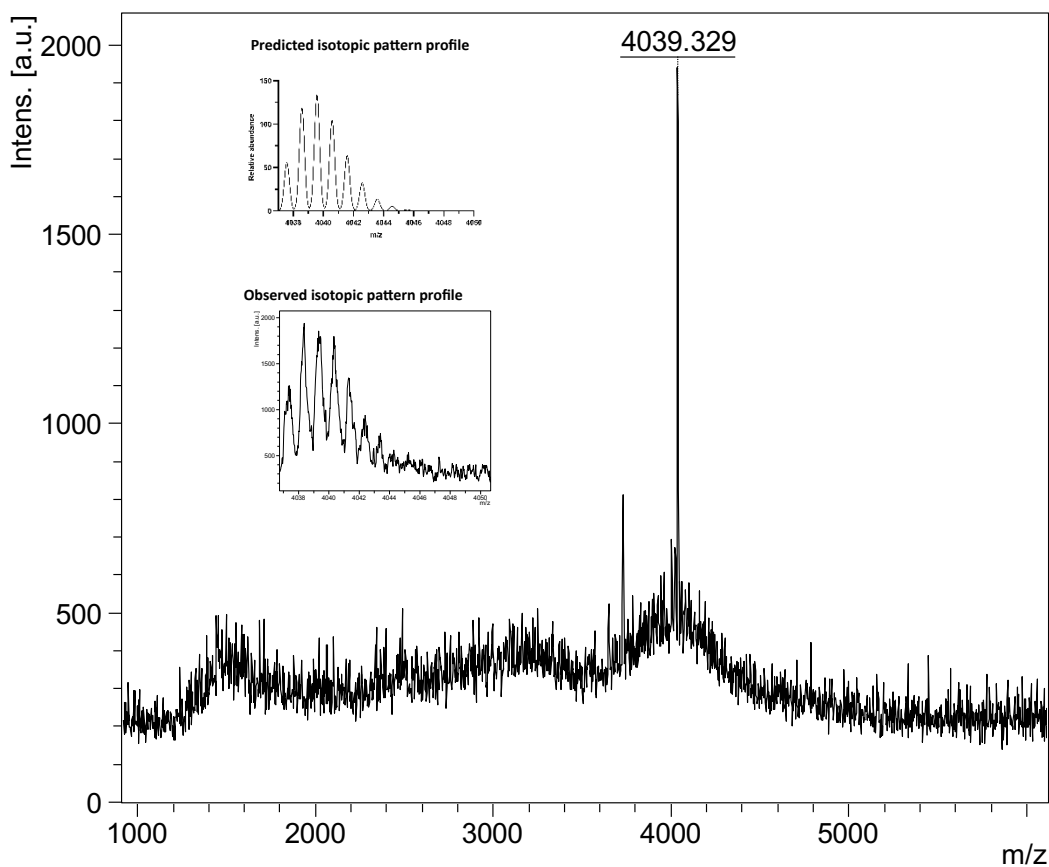

## PNA1-G4-D: C-Ter: Lys(AC<sup>G</sup>T GG<sup>G</sup>G AT<sup>G</sup>T CA<sup>C</sup>C -Ac)-Dabcyl

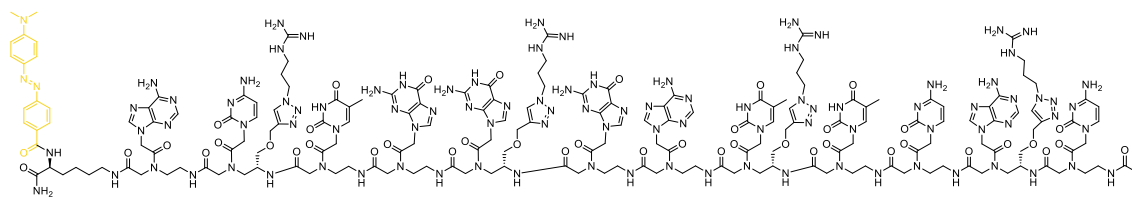

**Chemical Formula:** C<sub>184</sub>H<sub>245</sub>N<sub>99</sub>O<sub>43</sub> **Exact Mass:** 4529.003 **Molecular Weight:** 4531.634

**LC-MS-ESI+:**  $m/z$  expected for  $[M+5H]^{5+}$ : 907.2,  $m/z$  found: 907.3;  $m/z$  expected for  $[M+4H]^{4+}$ : 1133.8,  $m/z$  found: 1133.9;  $m/z$  expected for  $[M+3H]^{3+}$ : 1511.3,  $m/z$  found: 1511.2. (0.1% aqueous TFA solution and 0.1% TFA in HPLC grade acetonitrile used as eluents.)

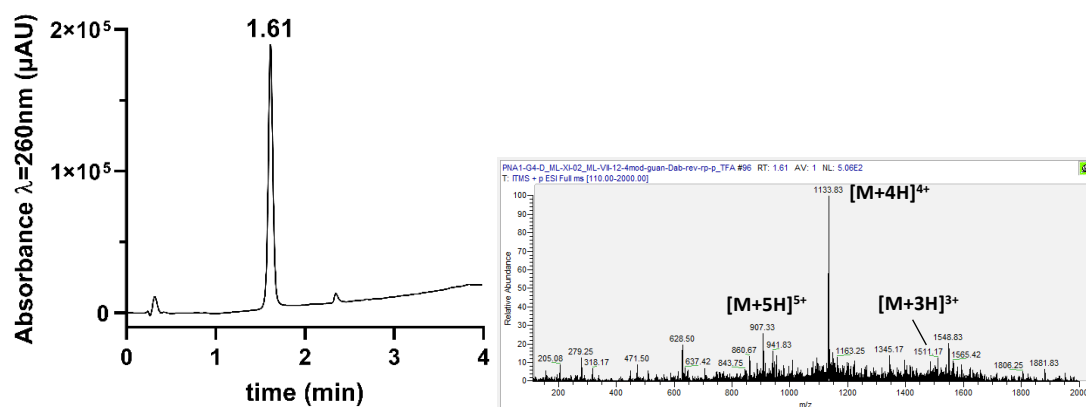

**MALDI-TOF-MS:**  $m/z$  expected for  $[M+H]^+$ : 4532.004,  $m/z$  found: 4532.629. In all PNAs containing Dabcyl quencher have a secondary peak with a -132  $m/z$  corresponding to a fragmentation of the quencher.

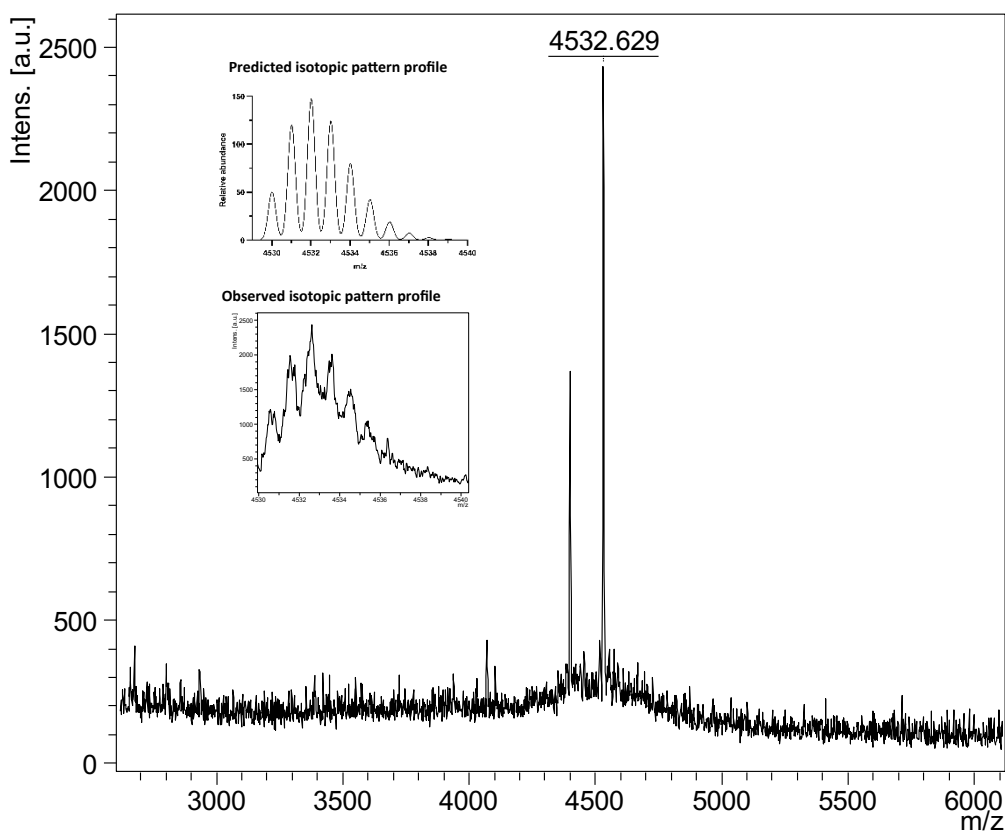

**PNA1-G4-F: C-Ter: GT<sup>G</sup> AA<sup>G</sup>T CC<sup>G</sup>C AG<sup>G</sup>T-Lys(FITC)-Ac**

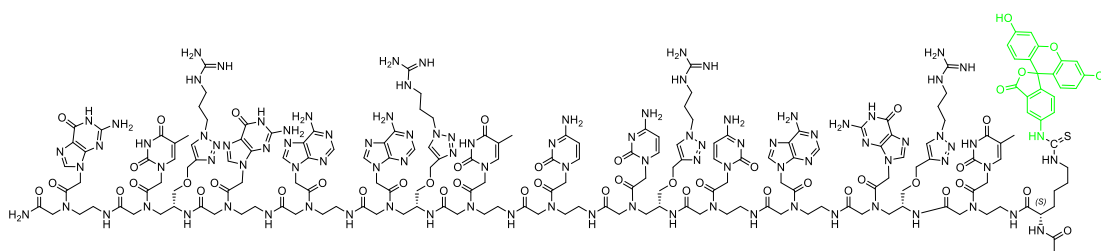

**Chemical Formula:** C<sub>190</sub>H<sub>243</sub>N<sub>97</sub>O<sub>47</sub>S **Exact Mass:** 4666.933 **Molecular Weight:** 4669.726

**LC-MS-ESI+:**  $m/z$  expected for  $[M+6H]^{6+}$ : 779.2,  $m/z$  found: 779.3;  $m/z$  expected for  $[M+5H]^{5+}$ : 934.8,  $m/z$  found: 935.2;  $m/z$  expected for  $[M+4H]^{4+}$ : 1168.2,  $m/z$  found: 1168.5;  $m/z$  expected for  $[M+3H]^{3+}$ : 1557.3,  $m/z$  found: 1557.3. (0.1% aqueous TFA solution and 0.1% TFA in HPLC grade acetonitrile used as eluents.)

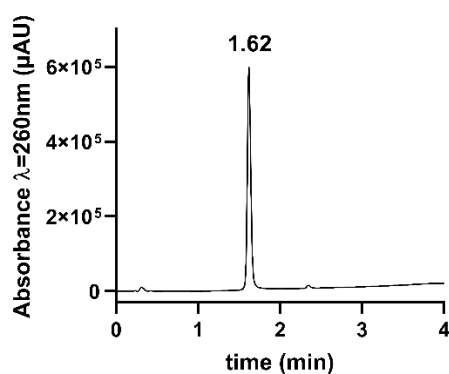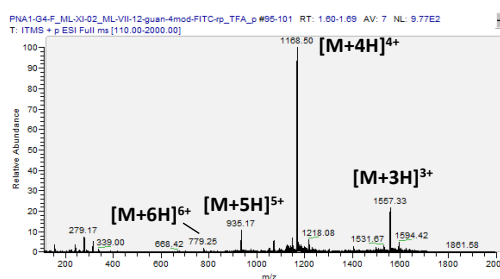

**MALDI-TOF-MS:**  $m/z$  expected for  $[M+H]^+$ : 4669.931,  $m/z$  found: 4669.190.

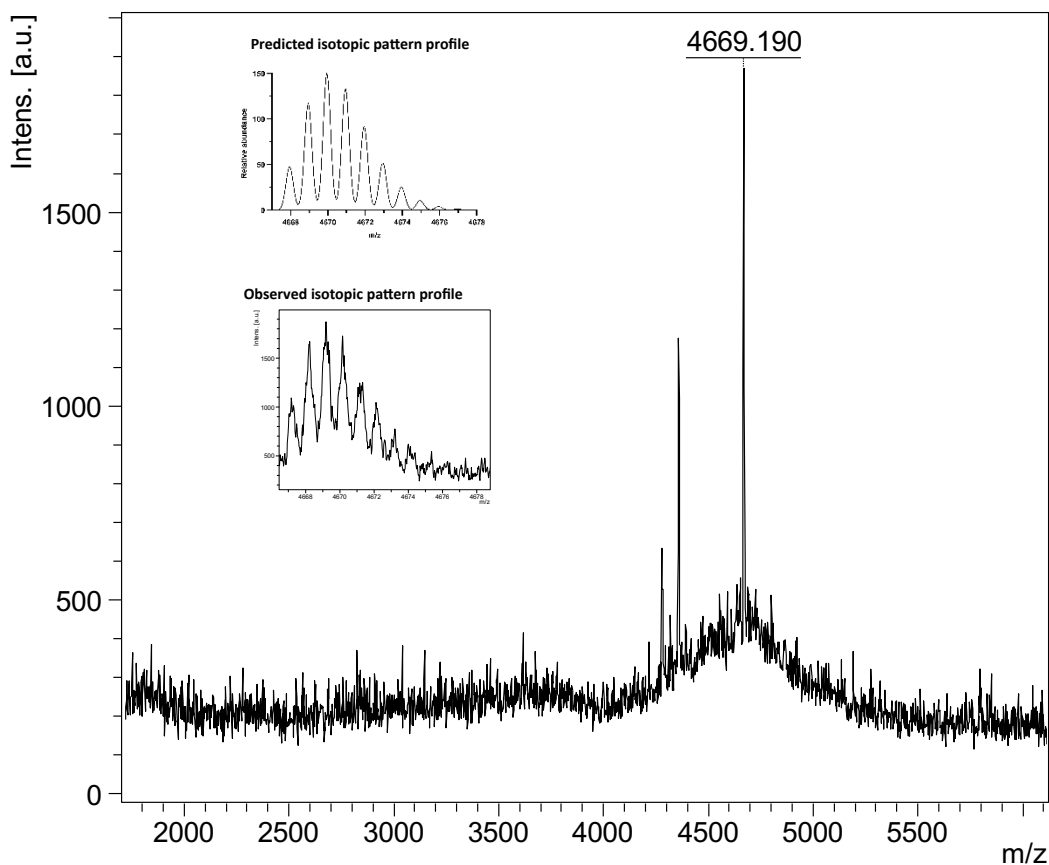

**PNA1-P1-D: C-Ter: Lys(ACT GG<sup>P</sup>G ATT CAC -Ac)-Dabcyl**

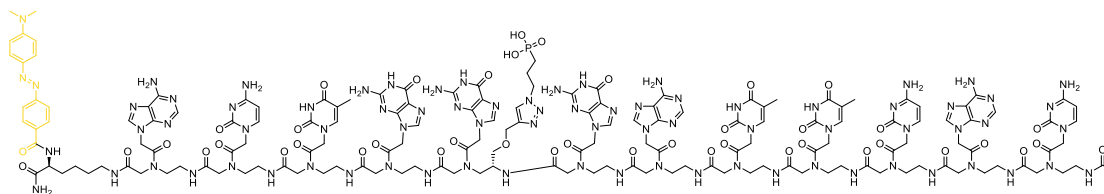

**Chemical Formula:** C<sub>159</sub>H<sub>201</sub>N<sub>78</sub>O<sub>43</sub>P **Exact Mass:** 3921.568 **Molecular Weight:** 3923.834

**LC-MS-ESI+:**  $m/z$  expected for  $[M+6H]^{6+}$ : 654.9,  $m/z$  found: 655.3;  $m/z$  expected for  $[M+5H]^{5+}$ : 785.7,  $m/z$  found: 786.1;  $m/z$  expected for  $[M+4H]^{4+}$ : 981.9,  $m/z$  found: 982.2;  $m/z$  expected for  $[M+3H]^{3+}$ : 1308.8,  $m/z$  found: 1308.8.

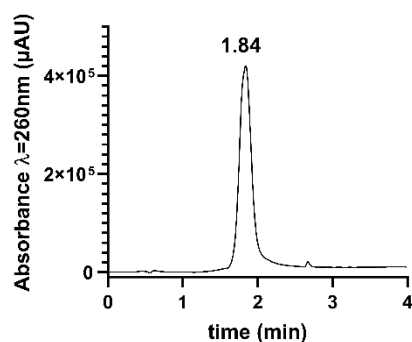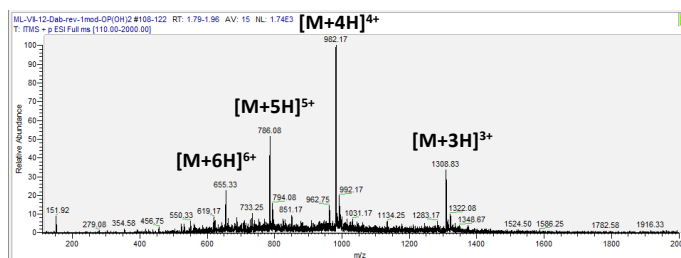

**MALDI-TOF-MS:**  $m/z$  expected for  $[M+H]^+$ : 3924.575,  $m/z$  found: 3924.998. In all PNAs containing Dabcyl quencher have a secondary peak with a -132  $m/z$  corresponding to a fragmentation of the quencher.

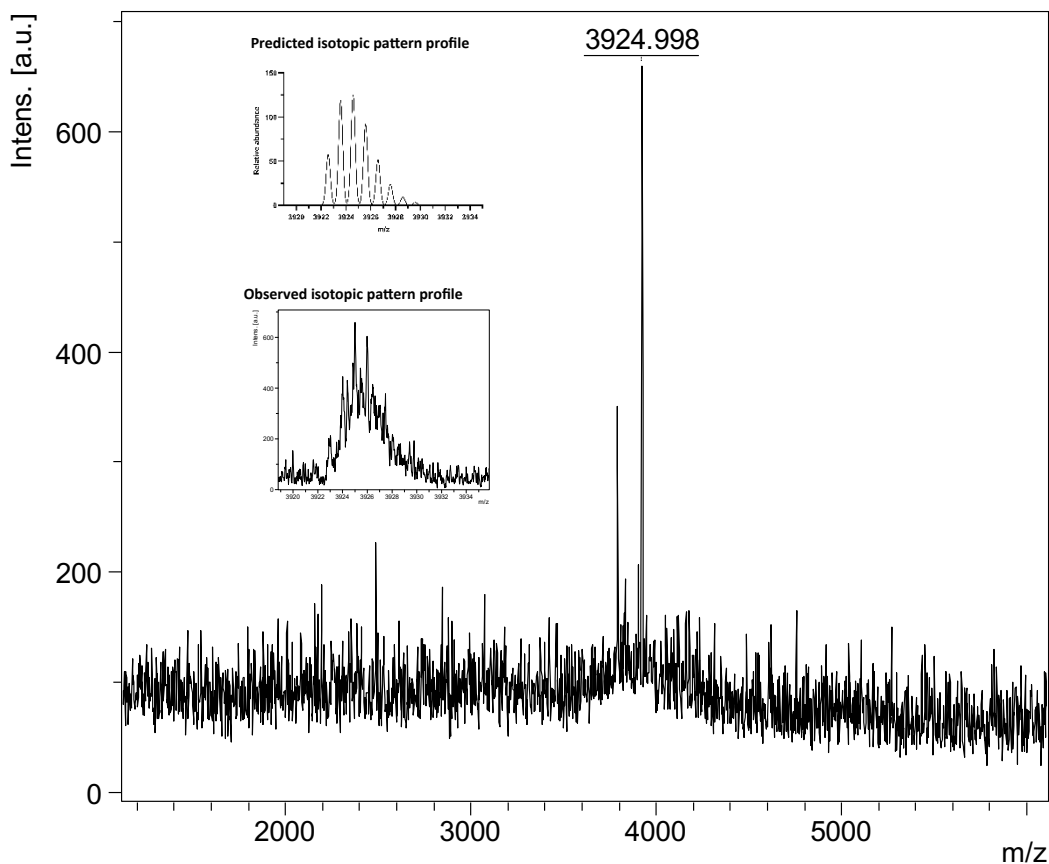

**PNA1-P4-D: C-Ter: Lys(AC<sup>P</sup>T GG<sup>P</sup>G AT<sup>P</sup>T CA<sup>P</sup>C -Ac)-DabcyI**

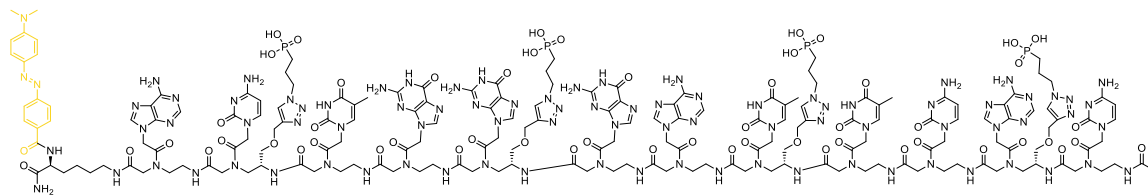

**Chemical Formula:** C<sub>180</sub>H<sub>237</sub>N<sub>87</sub>O<sub>55</sub>P<sub>4</sub> **Exact Mass:** 4620.737 **Molecular Weight:** 4623.325

**LC-MS-ESI+:**  $m/z$  expected for  $[M+5H]^{5+}$ : 925.6,  $m/z$  found: 926.1;  $m/z$  expected for  $[M+4H]^{4+}$ : 1156.9,  $m/z$  found: 1157.0;  $m/z$  expected for  $[M+3H]^{3+}$ : 1541.9,  $m/z$  found: 1542.3.

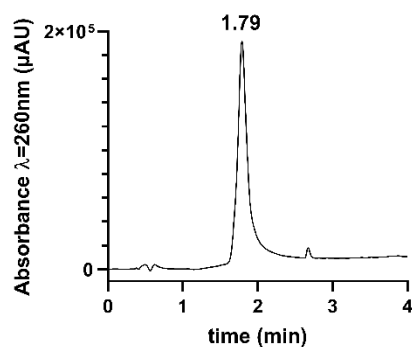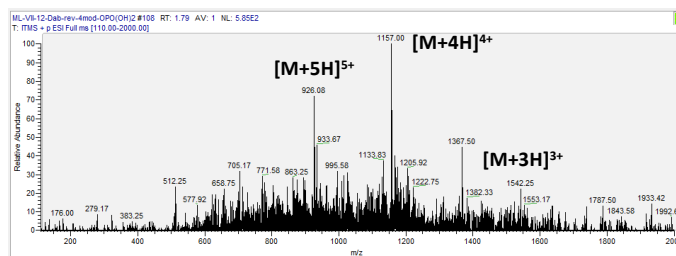

**MALDI-TOF-MS:**  $m/z$  expected for  $[M+H]^+$ : 4624.752,  $m/z$  found: 4623.978. In all PNAs containing DabcyI quencher have a secondary peak with a -132  $m/z$  corresponding to a fragmentation of the quencher.

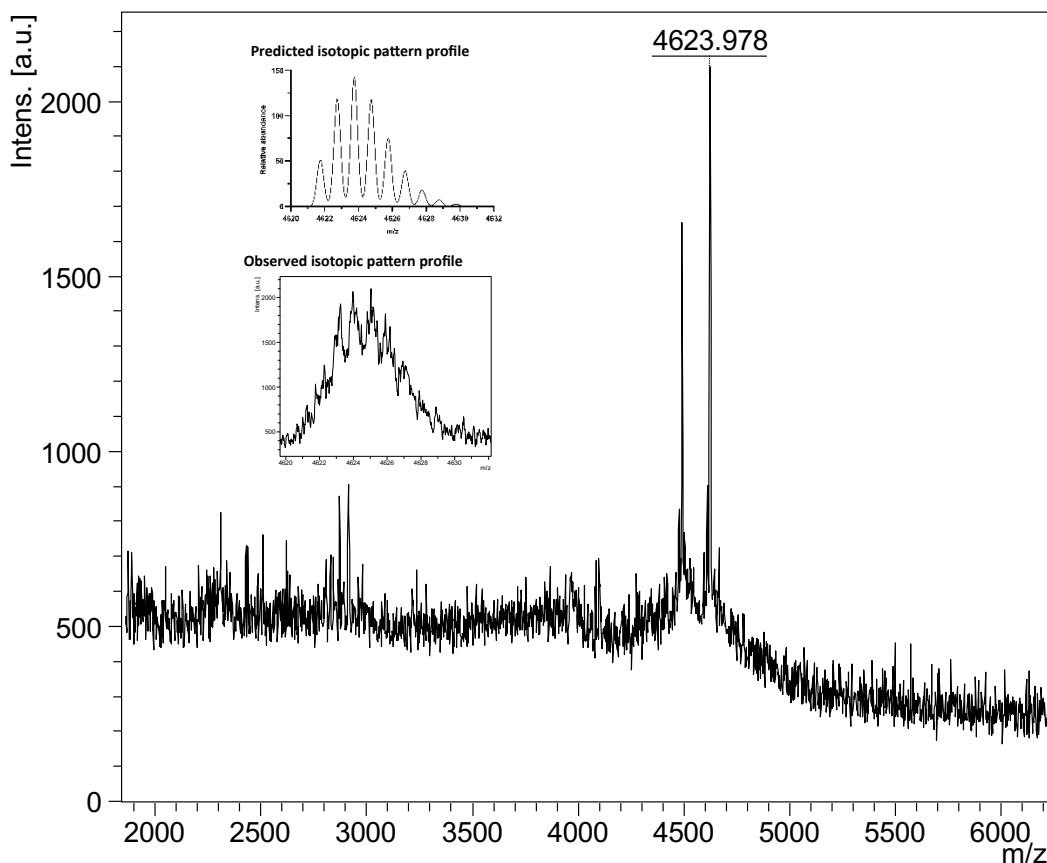

**PNA1-P1-F: C-Ter: GTG AAT CC<sup>P</sup>C AGT-Lys(FITC)-Ac**

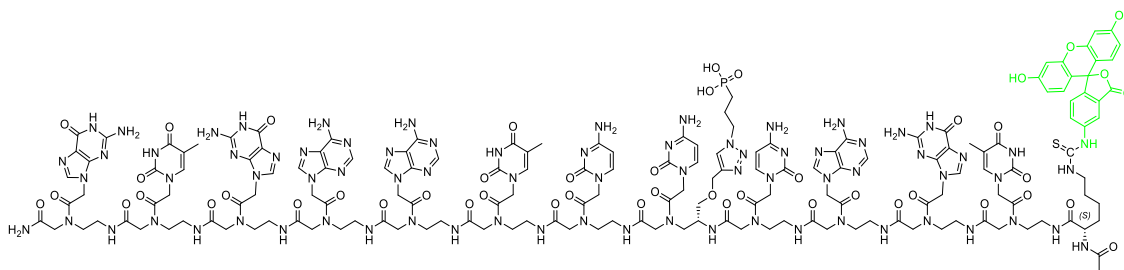

**Chemical Formula:** C<sub>165</sub>H<sub>199</sub>N<sub>76</sub>O<sub>47</sub>PS **Exact Mass:** 4059.498 **Molecular Weight:** 4061.926

**LC-MS-ESI+:**  $m/z$  expected for  $[M+4H]^{4+}$ : 1016.4,  $m/z$  found: 1016.8;  $m/z$  expected for  $[M+3H]^{3+}$ : 1354.8,  $m/z$  found: 1354.8. (0.1% aqueous TFA solution and 0.1% TFA in HPLC grade acetonitrile used as eluents.)

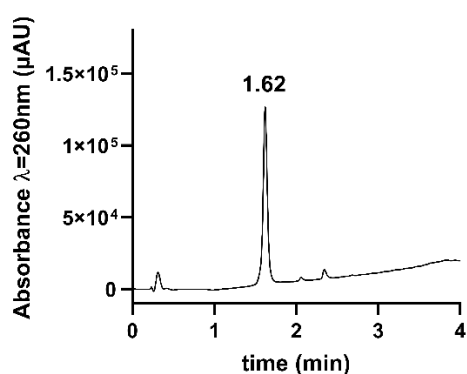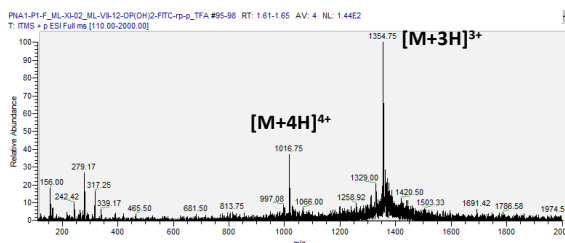

**MALDI-TOF-MS:**  $m/z$  expected for  $[M+H]^+$ : 4062.514,  $m/z$  found: 4061.662.

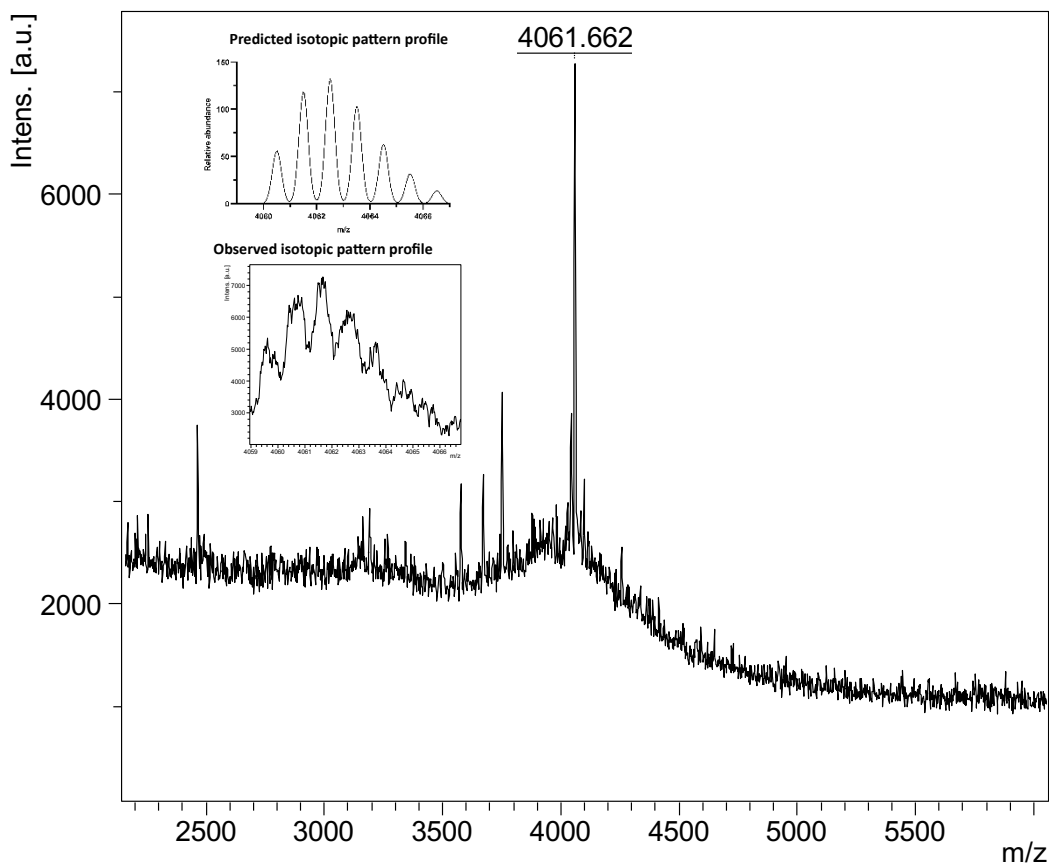

**PNA1-P4-F: C-Ter: GT<sup>P</sup>GAA<sup>PT</sup>CC<sup>P</sup>CAG<sup>PT</sup>-Lys(FITC)-Ac**

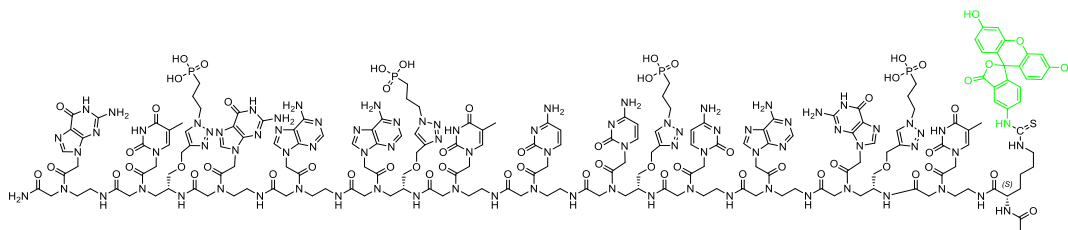

**Chemical Formula:** C<sub>186</sub>H<sub>235</sub>N<sub>85</sub>O<sub>59</sub>P<sub>4</sub>S **Exact Mass:** 4758.667 **Molecular Weight:** 4761.417

**LC-MS-ESI+:**  $m/z$  expected for  $[M+5H]^{5+}$ : 953.1,  $m/z$  found: 953.3;  $m/z$  expected for  $[M+4H]^{4+}$ : 1191.2,  $m/z$  found: 1191.3;  $m/z$  expected for  $[M+3H]^{3+}$ : 1587.9,  $m/z$  found: 1587.7.

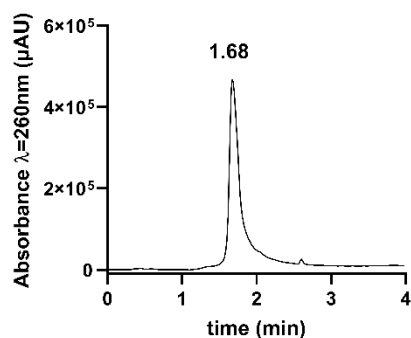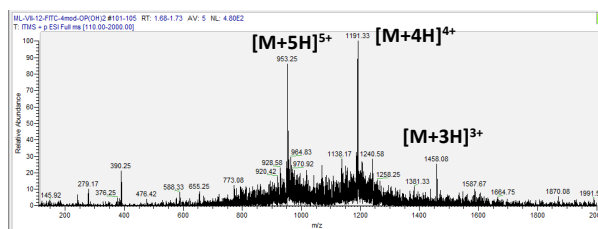

**MALDI-TOF-MS:**  $m/z$  expected for  $[M+H]^+$ : 4761.677,  $m/z$  found: 4761.874.

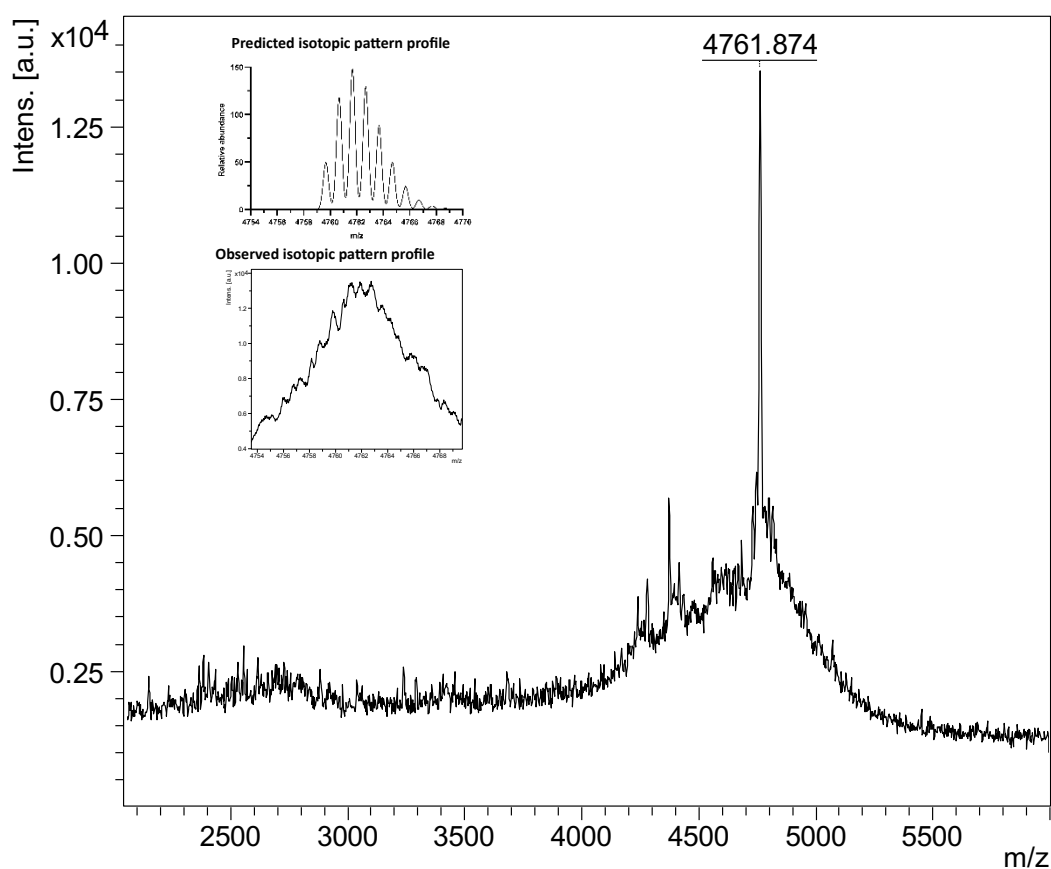



**PNA3-Bt: C-Ter: GGATT CAC-Lys(Bt)-Ac**

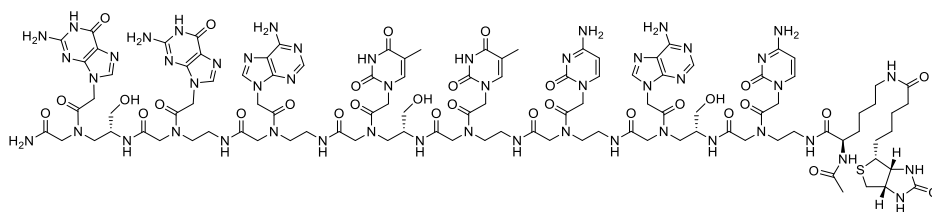

**Chemical Formula:** C<sub>107</sub>H<sub>143</sub>N<sub>51</sub>O<sub>31</sub>S **Exact Mass:** 2670.090 **Molecular Weight:** 2671.707

**LC-MS-ESI+:**  $m/z$  expected for  $[M+4H]^{4+}$ : 668.8,  $m/z$  found: 669.0;  $m/z$  expected for  $[M+3H]^{3+}$ : 891.1,  $m/z$  found: 891.6;  $m/z$  expected for  $[M+2H]^{2+}$ : 1336.6,  $m/z$  found: 1336.6.

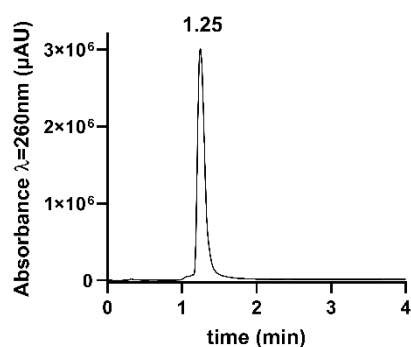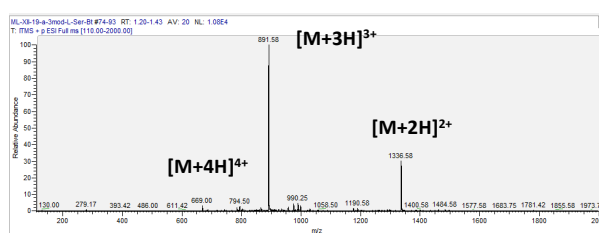

**MALDI-TOF-MS:**  $m/z$  expected for  $[M+H]^+$ : 2672.104,  $m/z$  found: 2672.439.

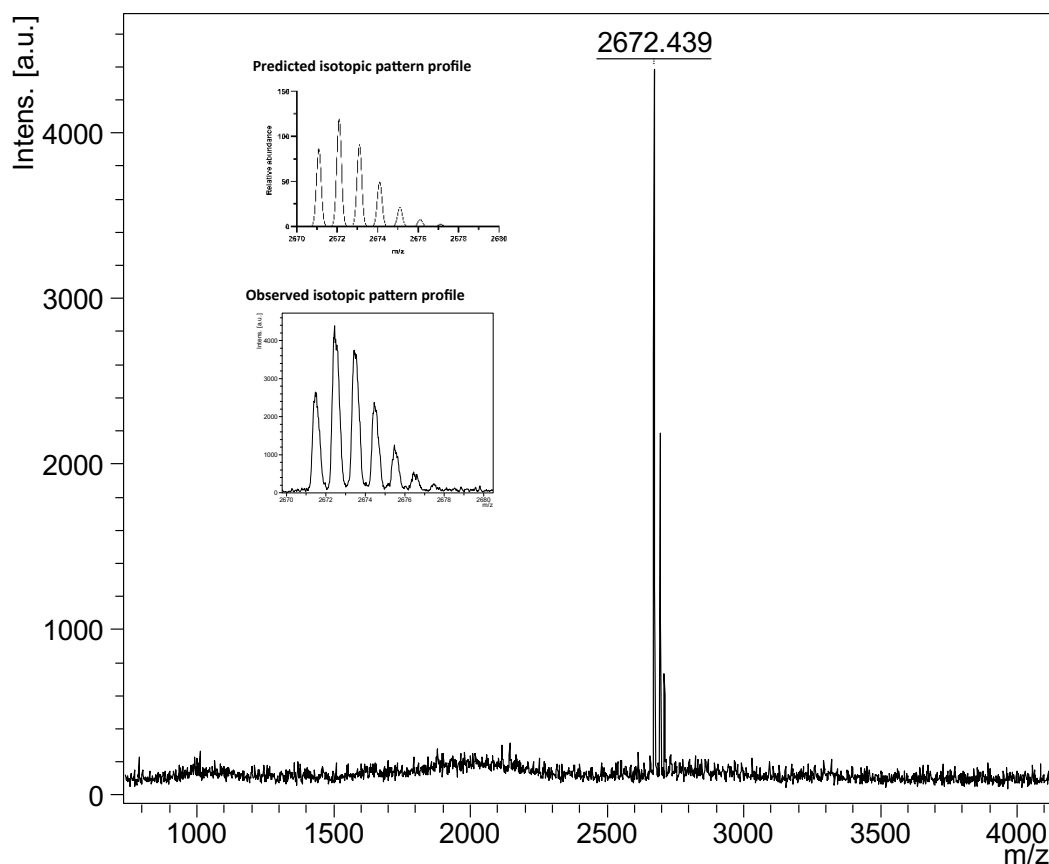

**PNA3-AAmBt: C-Ter: GG AT CAC-Lys(Bt)-Ac**

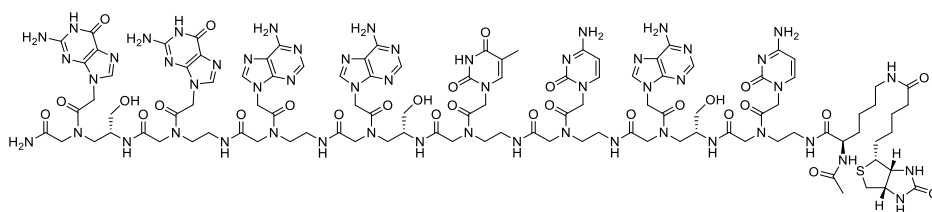

**Chemical Formula:** C<sub>107</sub>H<sub>142</sub>N<sub>54</sub>O<sub>29</sub>S **Exact Mass:** 2679.102 **Molecular Weight:** 2680.722

**LC-MS-ESI+:**  $m/z$  expected for  $[M+4H]^{4+}$ : 671.0,  $m/z$  found: 671.2;  $m/z$  expected for  $[M+3H]^{3+}$ : 894.4,  $m/z$  found: 894.6;  $m/z$  expected for  $[M+2H]^{2+}$ : 1341.1,  $m/z$  found: 1341.2.

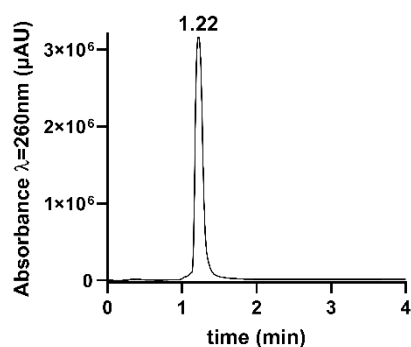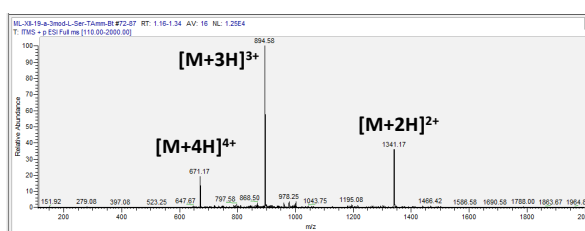

**MALDI-TOF-MS:**  $m/z$  expected for  $[M+H]^+$ : 2681.121,  $m/z$  found: 2681.776.

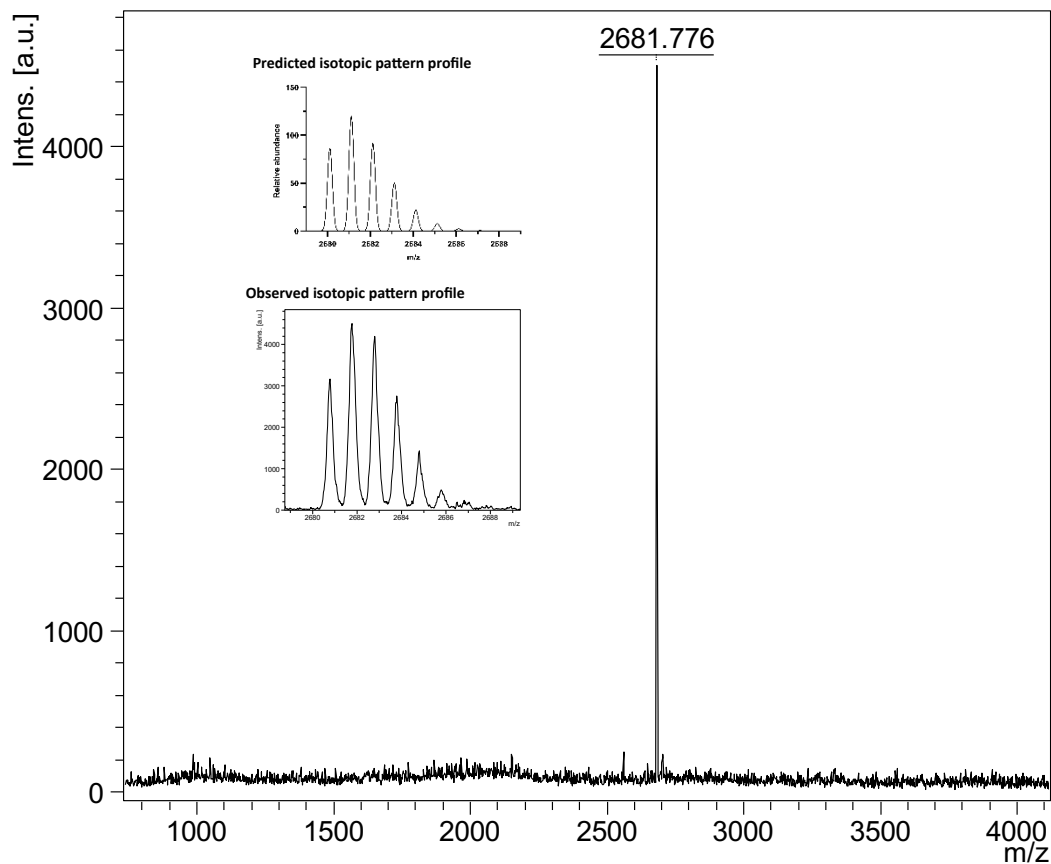

### PNA2-ach: C-Ter: GTG AAT CC -Ac

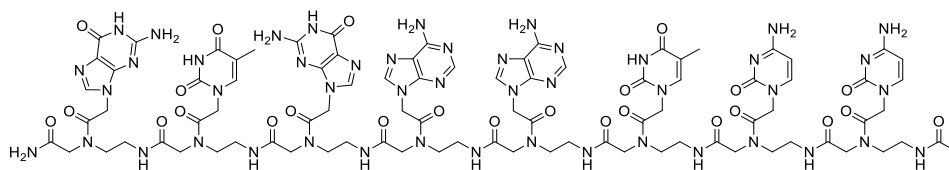

**Chemical Formula:** C<sub>88</sub>H<sub>111</sub>N<sub>47</sub>O<sub>25</sub> **Exact Mass:** 2225.886 **Molecular Weight:** 2227.160

**LC-MS-ESI+:**  $m/z$  expected for  $[M+4H]^{4+}$ : 557.7,  $m/z$  found: 557.8;  $m/z$  expected for  $[M+3H]^{3+}$ : 743.3,  $m/z$  found: 743.4;  $m/z$  expected for  $[M+2H]^{2+}$ : 1114.5,  $m/z$  found: 1114.5.

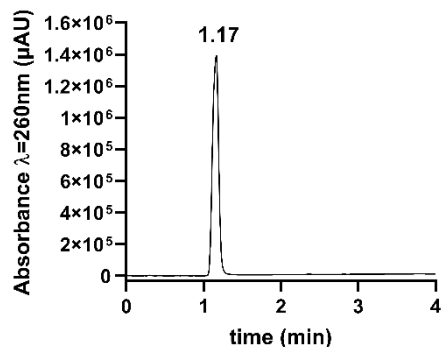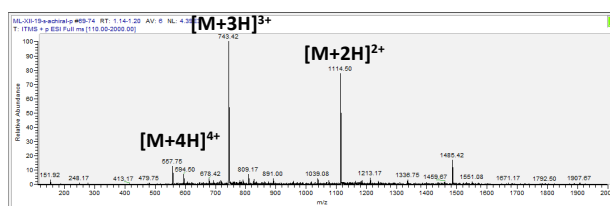

**MALDI-TOF-MS:**  $m/z$  expected for  $[M+Na]^+$ : 2227.901,  $m/z$  found: 2227.556.

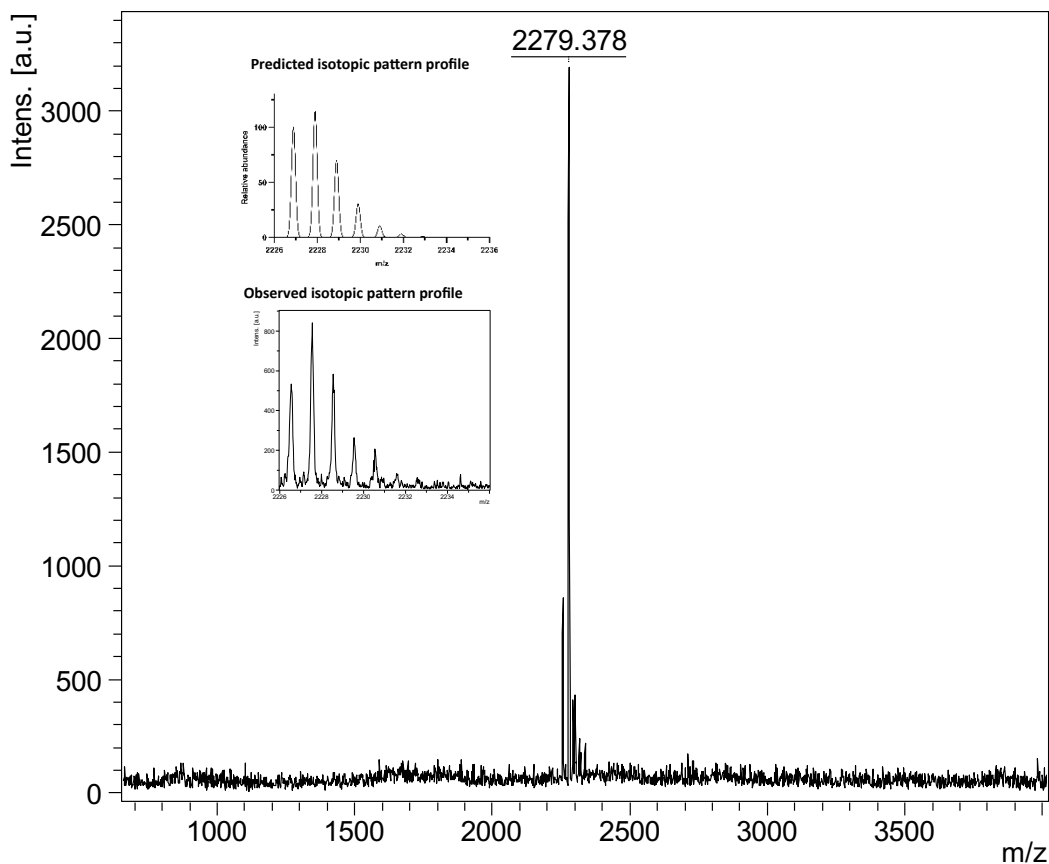

**PNA2-H1: C-Ter: GTG AA<sup>H</sup>T CC -Ac**

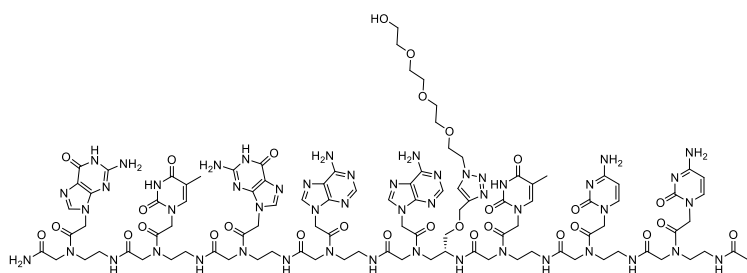

**Chemical Formula:** C<sub>100</sub>H<sub>132</sub>N<sub>50</sub>O<sub>30</sub> **Exact Mass:** 2513.034 **Molecular Weight:** 2514.476

**LC-MS-ESI+:**  $m/z$  expected for  $[M+4H]^{4+}$ : 629.5,  $m/z$  found: 629.7;  $m/z$  expected for  $[M+3H]^{3+}$ : 839.0,  $m/z$  found: 839.0;  $m/z$  expected for  $[M+2H]^{2+}$ : 1258.0,  $m/z$  found: 1257.8.

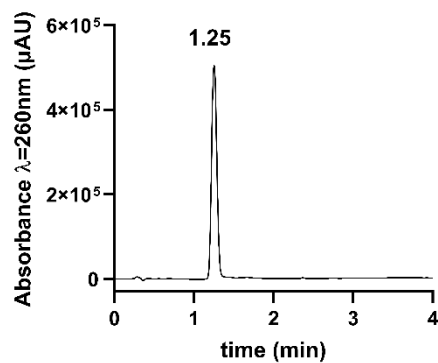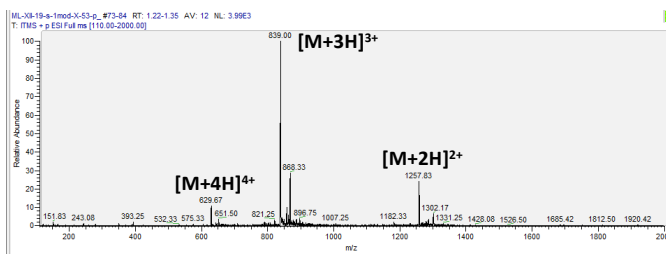

**MALDI-TOF-MS:**  $m/z$  expected for  $[M+Na]^+$ : 2537.030,  $m/z$  found: 2536.576.

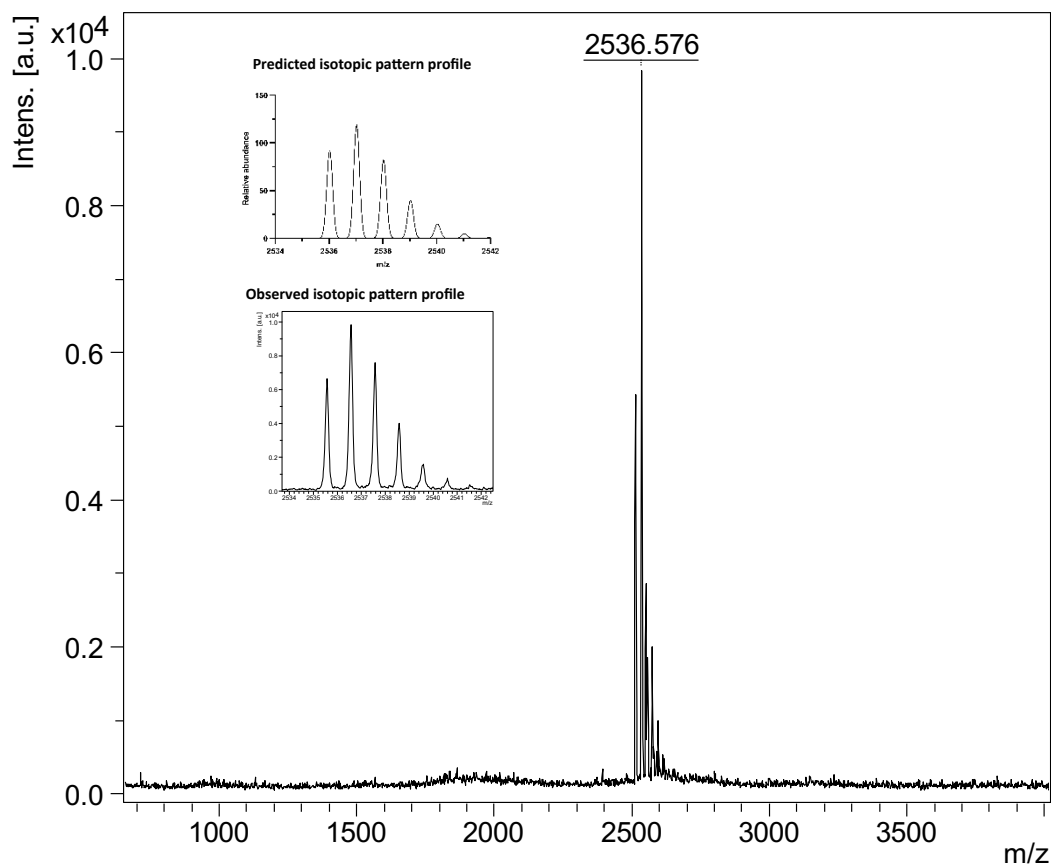

**PNA2-H3: C-Ter: GT<sup>H</sup>G AA<sup>H</sup>T CC<sup>H</sup>-Ac**

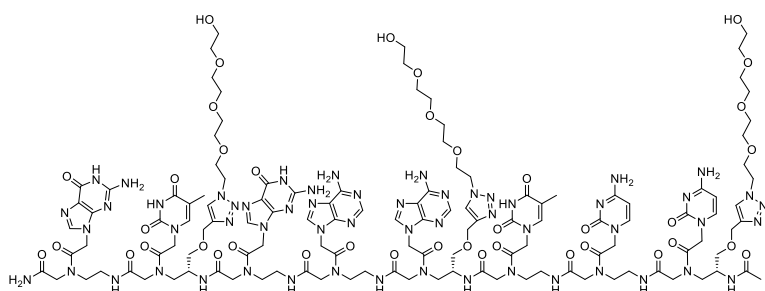

**Chemical Formula:** C<sub>124</sub>H<sub>174</sub>N<sub>56</sub>O<sub>40</sub> **Exact Mass:** 3087.330 **Molecular Weight:** 3089.108

**LC-MS-ESI+:**  $m/z$  expected for [M+4H]<sup>4+</sup>: 773.3,  $m/z$  found: 773.2;  $m/z$  expected for [M+3H]<sup>3+</sup>: 1030.4,  $m/z$  found: 1030.4;  $m/z$  expected for [M+2H]<sup>2+</sup>: 1545.2,  $m/z$  found: 1544.8.

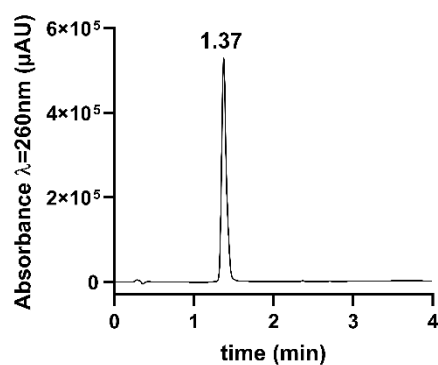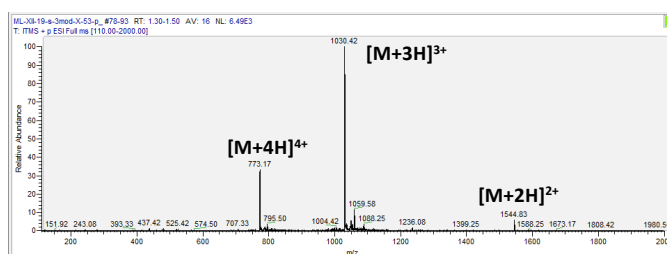

**MALDI-TOF-MS:**  $m/z$  expected for [M+Na]<sup>+</sup>: 3111.313,  $m/z$  found: 3110.563.

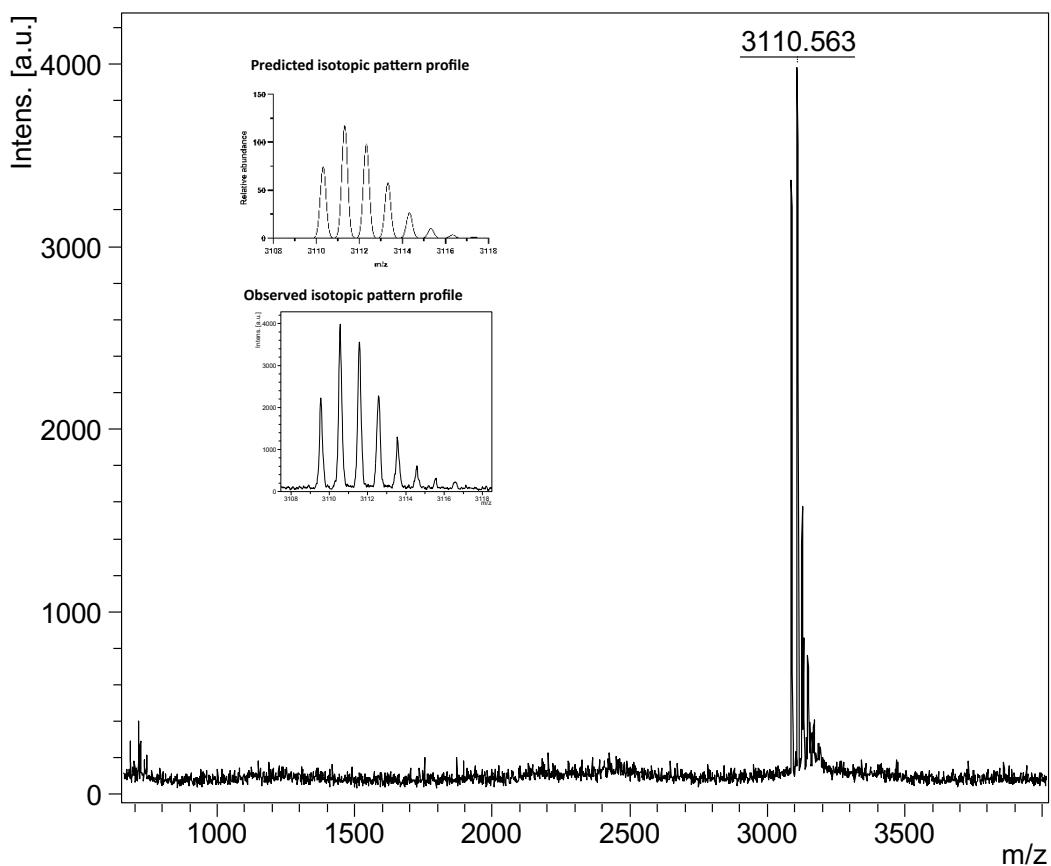

**PNA2-A3: C-Ter: GT<sup>A</sup>G AA<sup>A</sup>T CC<sup>A</sup> -Ac**

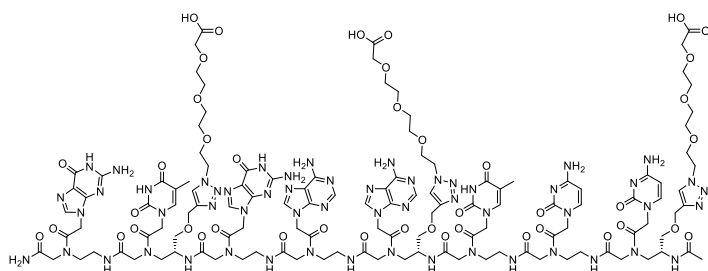

**Chemical Formula:** C<sub>124</sub>H<sub>168</sub>N<sub>56</sub>O<sub>43</sub> **Exact Mass:** 3129.268 **Molecular Weight:** 3131.057

**LC-MS-ESI+:**  $m/z$  expected for  $[M+4H]^{4+}$ : 783.6,  $m/z$  found: 783.6;  $m/z$  expected for  $[M+3H]^{3+}$ : 1044.4,  $m/z$  found: 1044.4;  $m/z$  expected for  $[M+2H]^{2+}$ : 1566.1,  $m/z$  found: 1565.8.

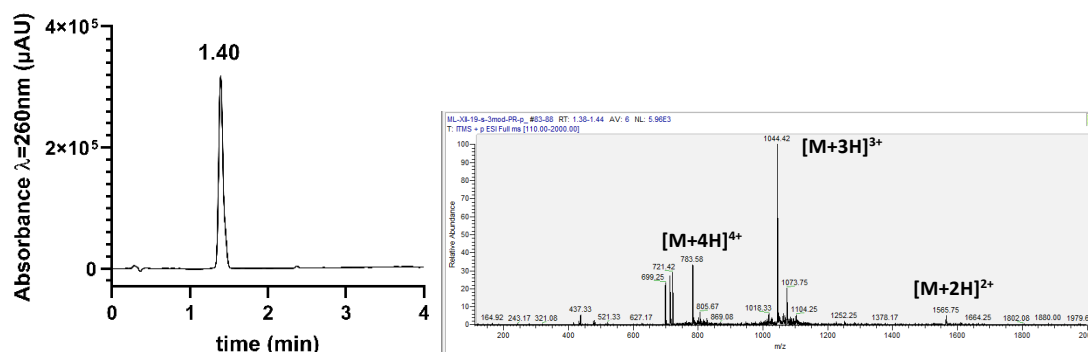

**MALDI-TOF-MS:**  $m/z$  expected for  $[M+H]^+$ : 3131.282,  $m/z$  found: 3130.871.

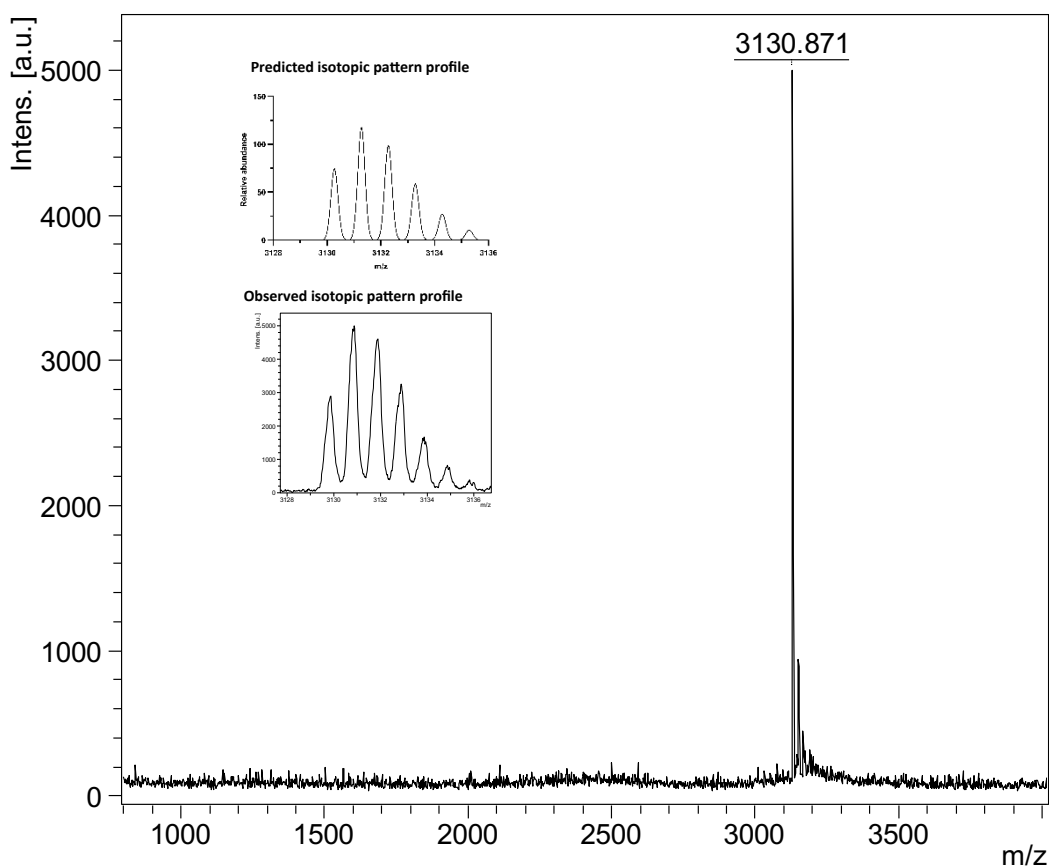

**PNA2-N3: C-Ter: GT<sup>N</sup>G AA<sup>N</sup>T CC<sup>N</sup>-Ac**

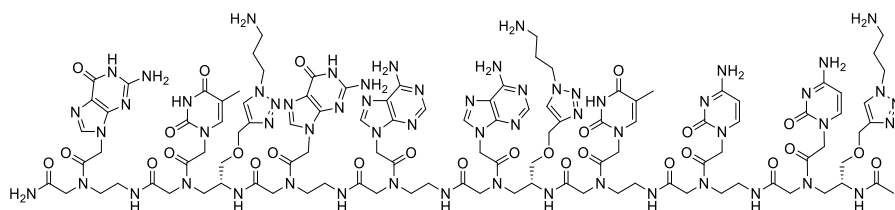

**Chemical Formula:** C<sub>109</sub>H<sub>147</sub>N<sub>59</sub>O<sub>28</sub> **Exact Mass:** 2730.189 **Molecular Weight:** 2731.760

**LC-MS-ESI+:** *m/z* expected for [M+4H]<sup>4+</sup>: 683.8, *m/z* found: 684.0; *m/z* expected for [M+3H]<sup>3+</sup>: 911.4, *m/z* found: 911.6; *m/z* expected for [M+2H]<sup>2+</sup>: 1366.6, *m/z* found: 1366.7 .

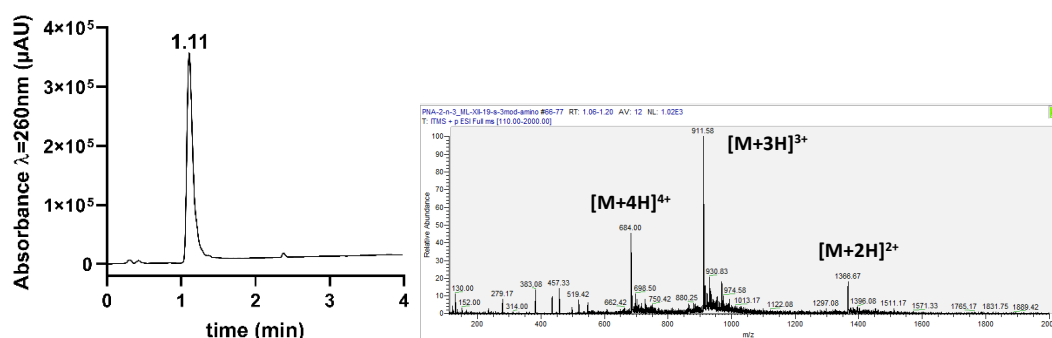

**MALDI-TOF-MS:** *m/z* expected for [M+H]<sup>+</sup>: 2732.194, *m/z* found: 2732.269.

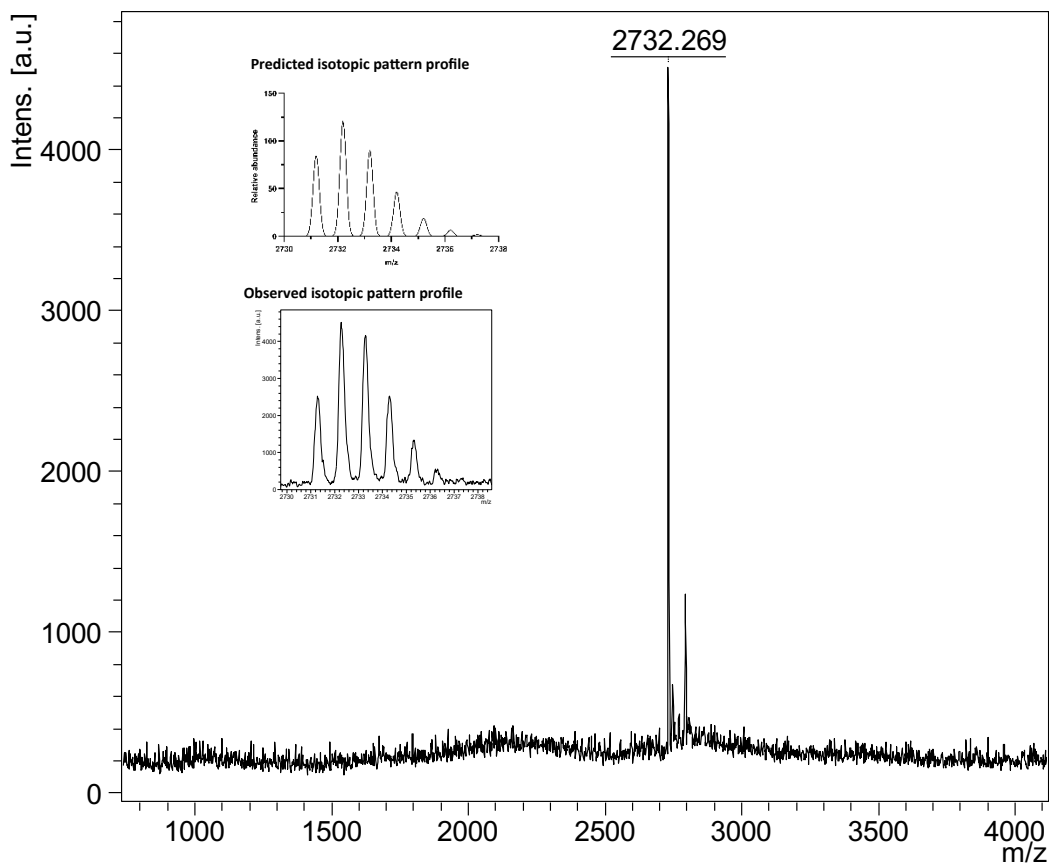

**PNA2-G3: C-Ter: GT<sup>G</sup>G AA<sup>G</sup>T CC<sup>G</sup>-Ac**

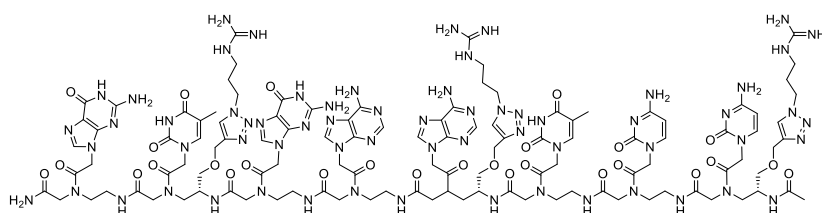

**Chemical Formula:** C<sub>113</sub>H<sub>154</sub>N<sub>64</sub>O<sub>28</sub> **Exact Mass:** 2855.259 **Molecular Weight:** 2856.895

**LC-MS-ESI+:**  $m/z$  expected for  $[M+4H]^{4+}$ : 715.1,  $m/z$  found: 715.5;  $m/z$  expected for  $[M+3H]^{3+}$ : 953.1,  $m/z$  found: 953.5;  $m/z$  expected for  $[M+2H]^{2+}$ : 1429.1,  $m/z$  found: 1429.6.

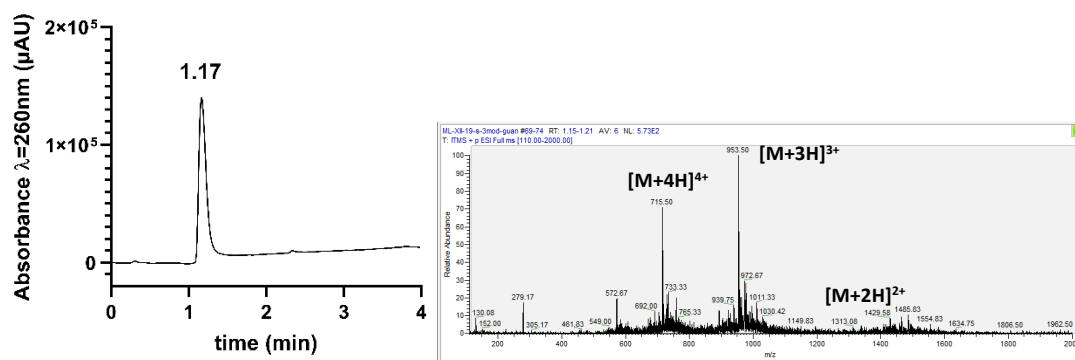

**MALDI-TOF-MS:**  $m/z$  expected for  $[M+H]^+$ : 2857.269,  $m/z$  found: 2857.701.

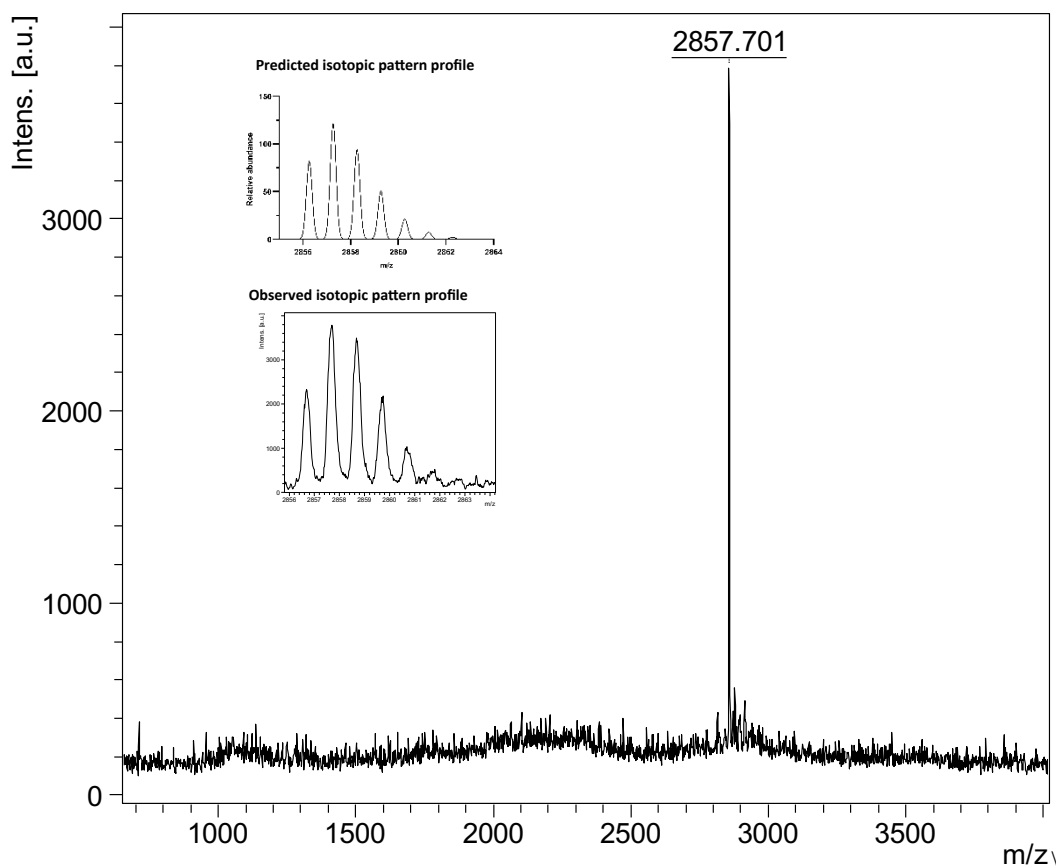



**PNA2-P3: C-Ter: GT<sup>P</sup>G AA<sup>PT</sup>CC<sup>P</sup>-Ac**

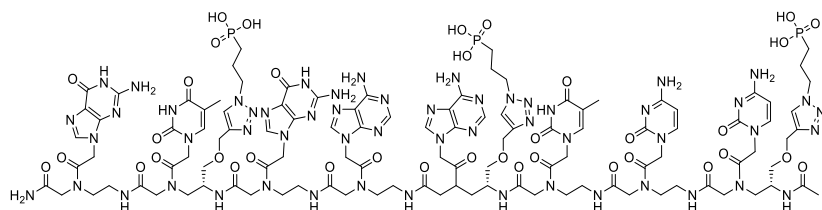

**Chemical Formula:** C<sub>110</sub>H<sub>148</sub>N<sub>55</sub>O<sub>37</sub>P<sub>3</sub> **Exact Mass:** 2924.060 **Molecular Weight:** 2925.663

**LC-MS-ESI+:**  $m/z$  expected for  $[M+4H]^{4+}$ : 732.3,  $m/z$  found: 732.7;  $m/z$  expected for  $[M+3H]^{3+}$ : 976.0,  $m/z$  found: 976.6;  $m/z$  expected for  $[M+2H]^{2+}$ : 1463.5,  $m/z$  found: 1464.0.

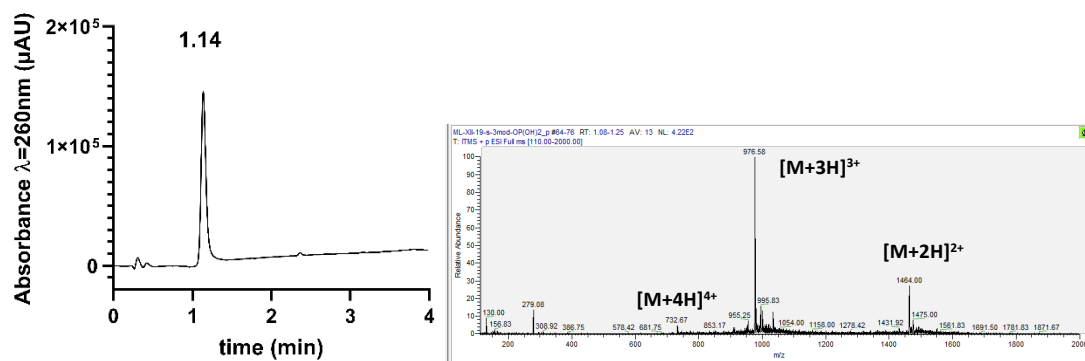

**MALDI-TOF-MS:**  $m/z$  expected for  $[M+H]^+$ : 2926.089,  $m/z$  found: 2926.953.

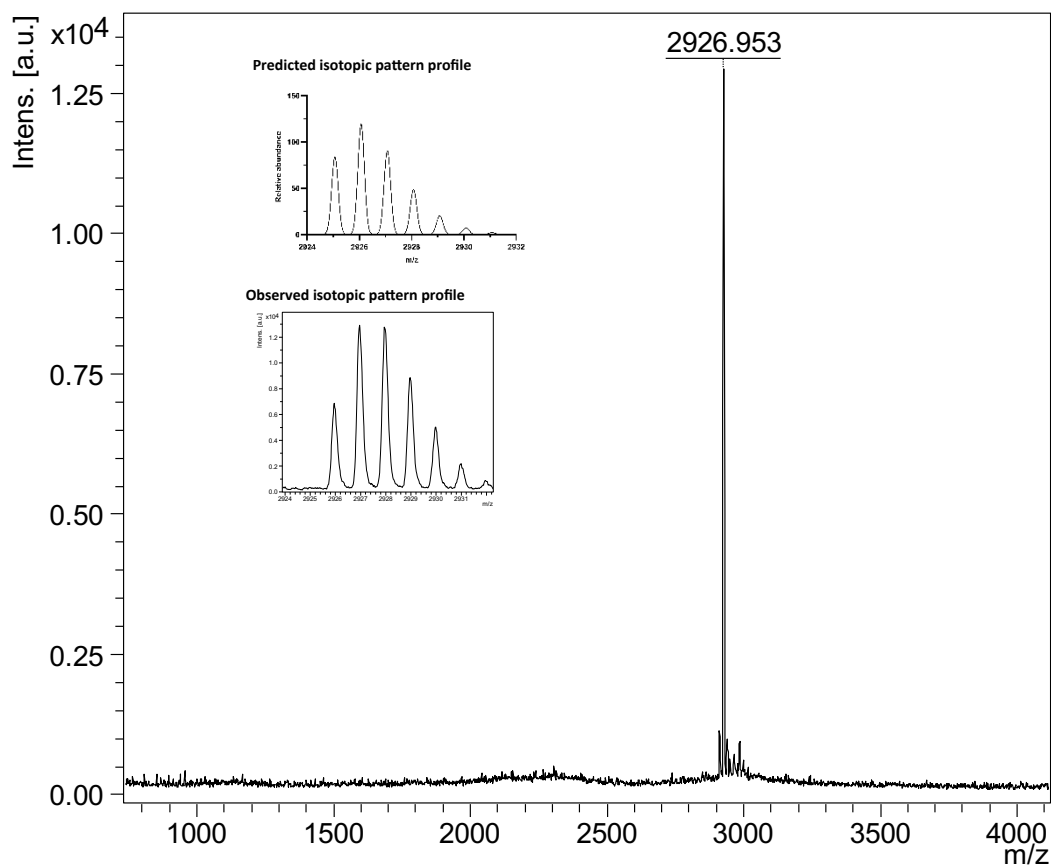

**PNA2-pc-ach: C-Ter: GTG<sup>+</sup> AAT C<sup>+</sup>C -Ac**

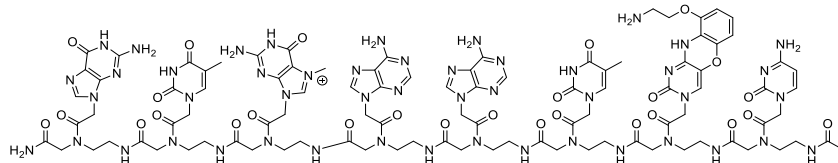

**Chemical Formula:** C<sub>97</sub>H<sub>121</sub>N<sub>48</sub>O<sub>27</sub><sup>+</sup> **Exact Mass:** 2389.957 **Molecular Weight:** 2391.343

**LC-MS-ESI+:** *m/z* expected for [M+3H]<sup>4+</sup>: 598.5, *m/z* found: 598.8; *m/z* expected for [M+2H]<sup>3+</sup>: 797.7, *m/z* found: 797.8; *m/z* expected for [M+H]<sup>2+</sup>: 1196.0, *m/z* found: 1196.1.

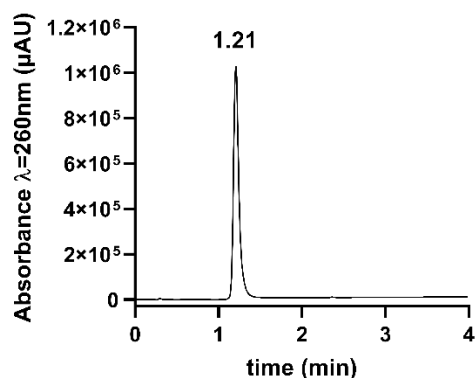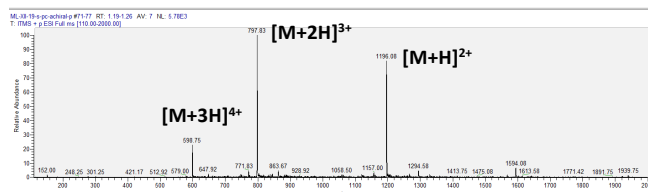

**MALDI-TOF-MS:** *m/z* expected for [M+H]<sup>+</sup>: 2390.968, *m/z* found: 2390.723.

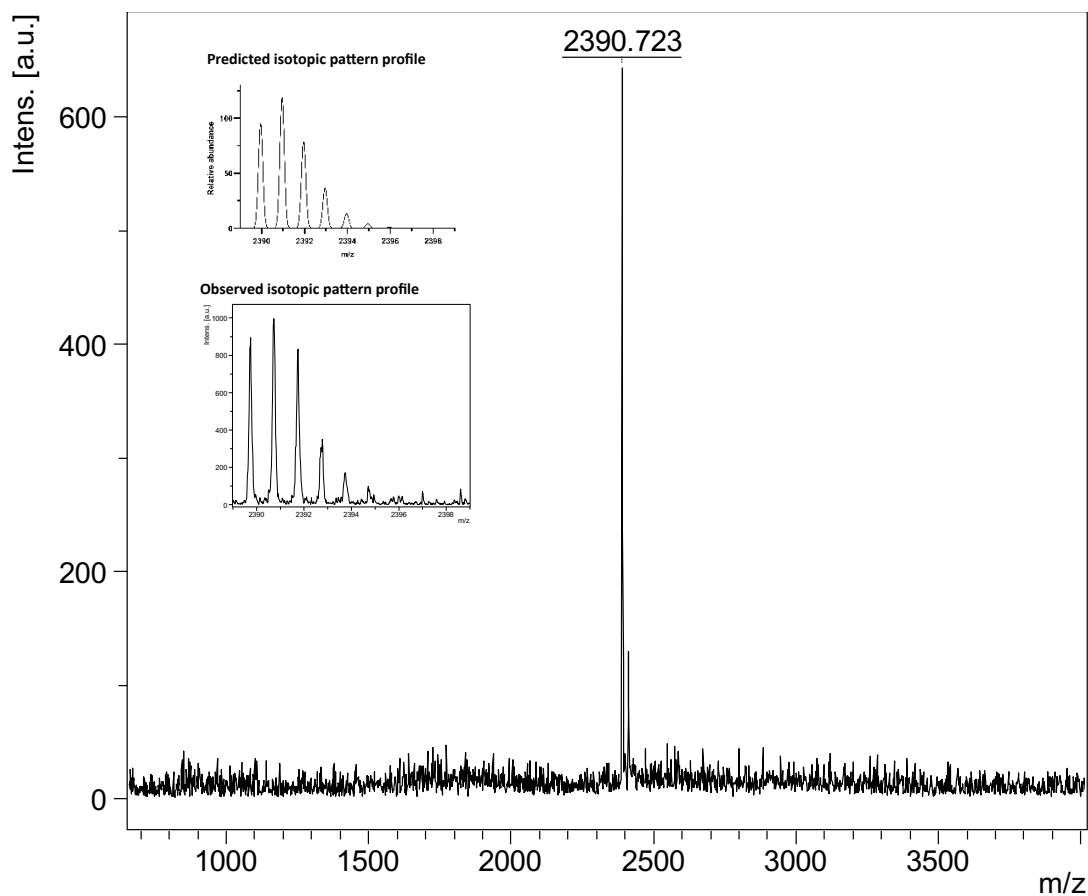

**PNA2-pc-H3: C-Ter: GT<sup>H</sup>G<sup>+</sup> AA<sup>H</sup>T C<sup>+</sup>C<sup>H</sup> -Ac**

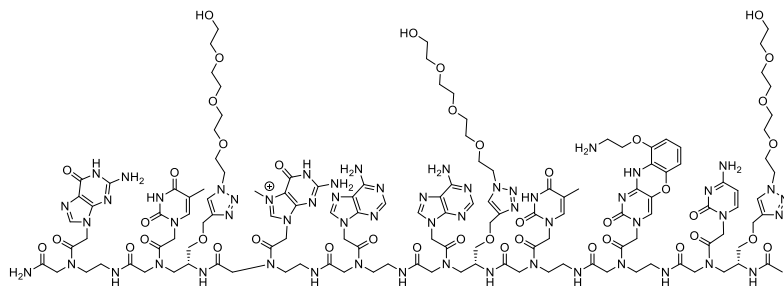

**Chemical Formula:** C<sub>133</sub>H<sub>184</sub>N<sub>57</sub>O<sub>42</sub><sup>+</sup> **Exact Mass:** 3251.401 **Molecular Weight:** 3253.291

**LC-MS-ESI+:** *m/z* expected for [M+3H]<sup>4+</sup>: 813.9, *m/z* found: 814.2; *m/z* expected for [M+2H]<sup>3+</sup>: 1084.8, *m/z* found: 1084.9; *m/z* expected for [M+H]<sup>2+</sup>: 1626.7, *m/z* found: 1626.6.

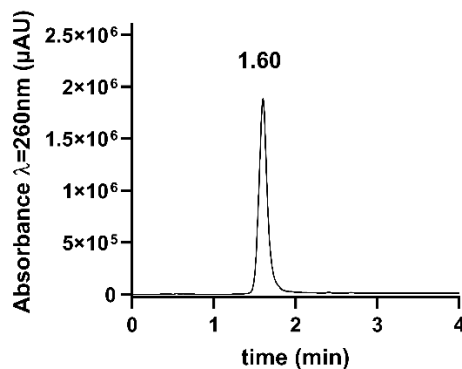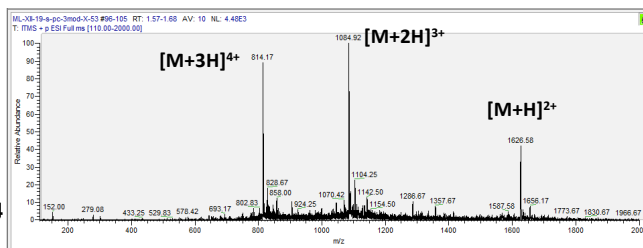

**MALDI-TOF-MS:** *m/z* expected for [M+H]<sup>+</sup>: 3252.420, *m/z* found: 3252.451.

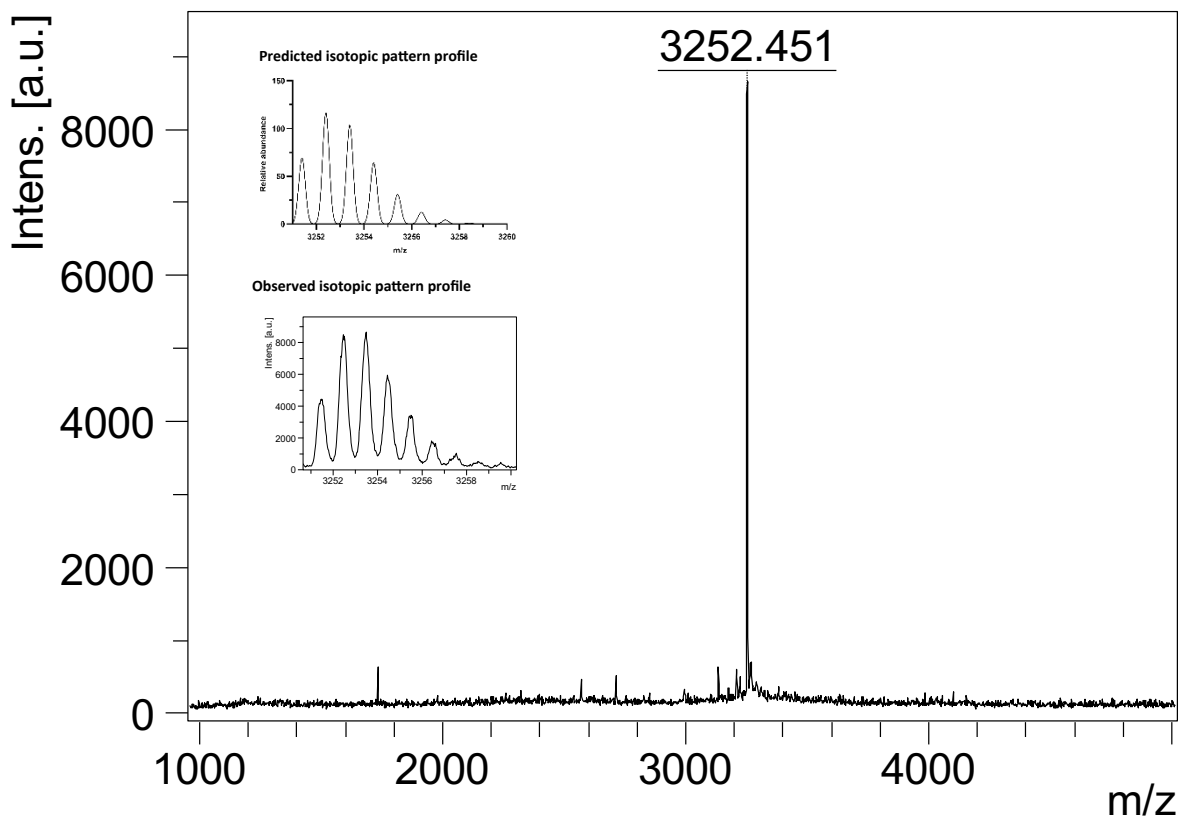

PNA2-pc-A1: C-Ter: GTG<sup>+</sup> AA<sup>A</sup>T C<sup>+</sup>C -Ac

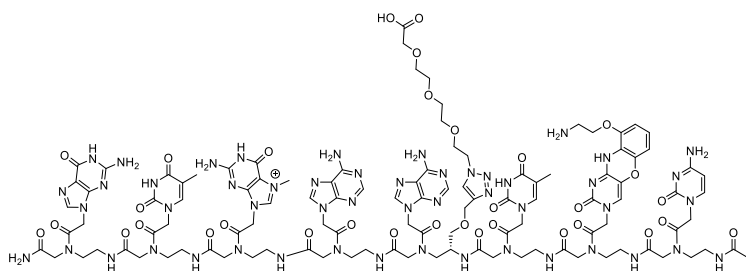

**Chemical Formula:** C<sub>109</sub>H<sub>140</sub>N<sub>51</sub>O<sub>33</sub><sup>+</sup> **Exact Mass:** 2691.084 **Molecular Weight:** 2692.642

**LC-MS-ESI+:** *m/z* expected for [M+3H]<sup>4+</sup>: 673.8, *m/z* found: 673.8; *m/z* expected for [M+2H]<sup>3+</sup>: 898.0, *m/z* found: 898.2; *m/z* expected for [M+H]<sup>2+</sup>: 1346.5, *m/z* found: 1346.4.

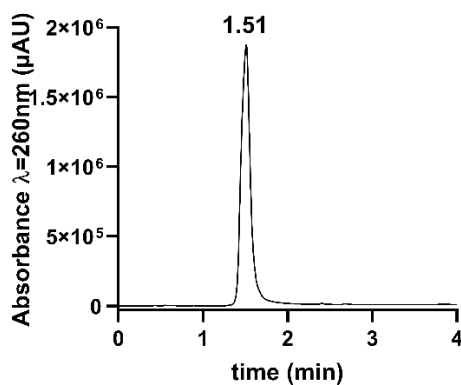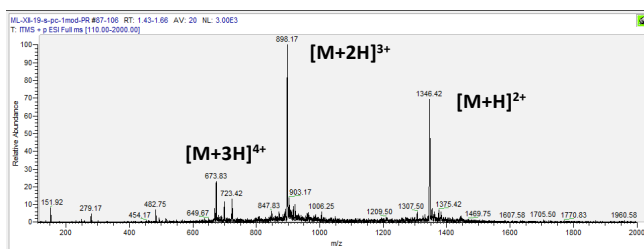

**MALDI-TOF-MS:** *m/z* expected for [M+H]<sup>+</sup>: 2692.079, *m/z* found: 2692.257.

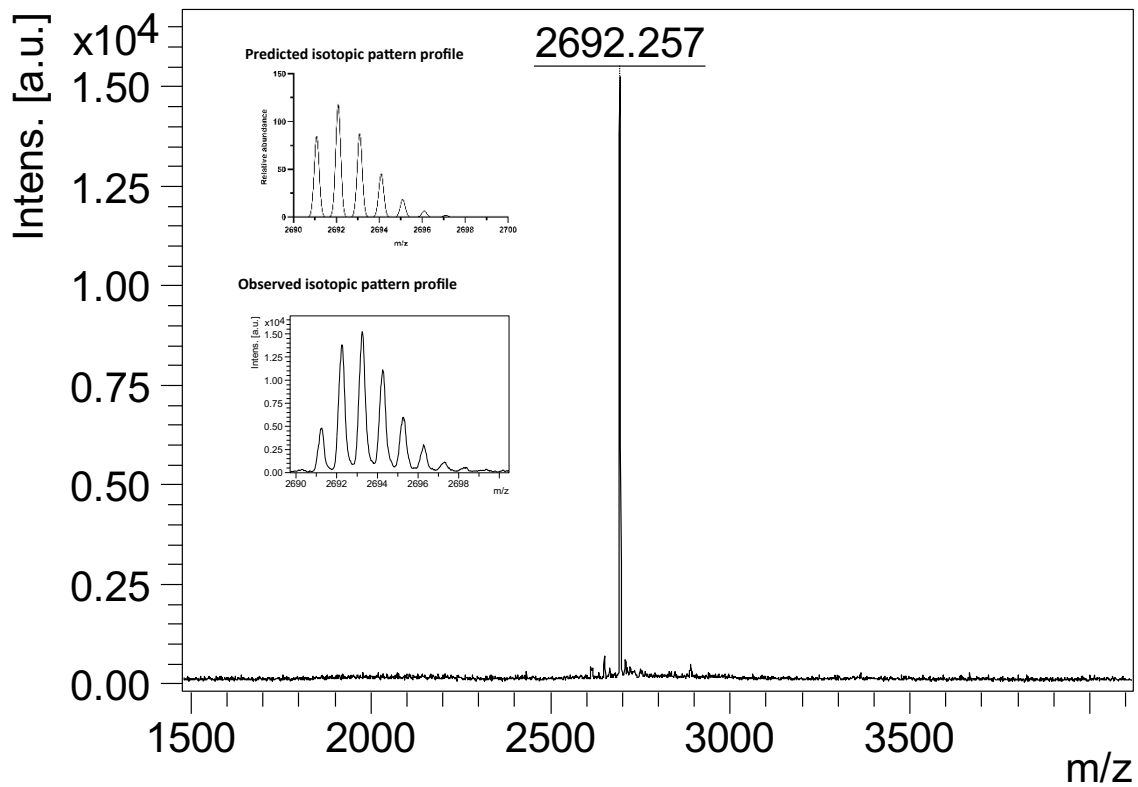

PNA2-pc-A3: C-Ter: GT<sup>A</sup>G<sup>+</sup> AA<sup>A</sup>T C<sup>+</sup>C<sup>A</sup> -Ac

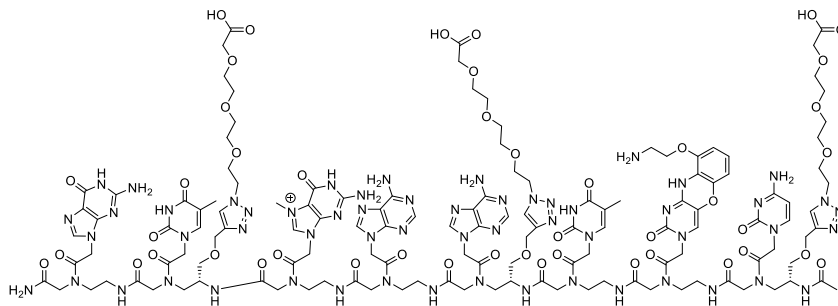

**Chemical Formula:** C<sub>133</sub>H<sub>178</sub>N<sub>57</sub>O<sub>45</sub><sup>+</sup> **Exact Mass:** 3293.339 **Molecular Weight:** 3295.240

**LC-MS-ESI+:**  $m/z$  expected for [M+3H]<sup>4+</sup>: 824.3,  $m/z$  found: 827.7;  $m/z$  expected for [M+2H]<sup>3+</sup>: 1098.8,  $m/z$  found: 1098.9;  $m/z$  expected for [M+H]<sup>2+</sup>: 1647.7,  $m/z$  found: 1647.8.

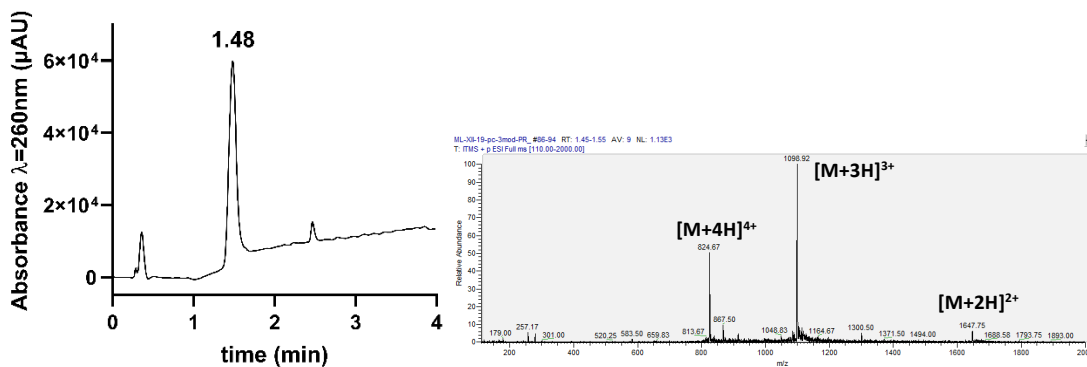

**MALDI-TOF-MS:**  $m/z$  expected for [M+H]<sup>+</sup>: 3294.351,  $m/z$  found: 3294.365.

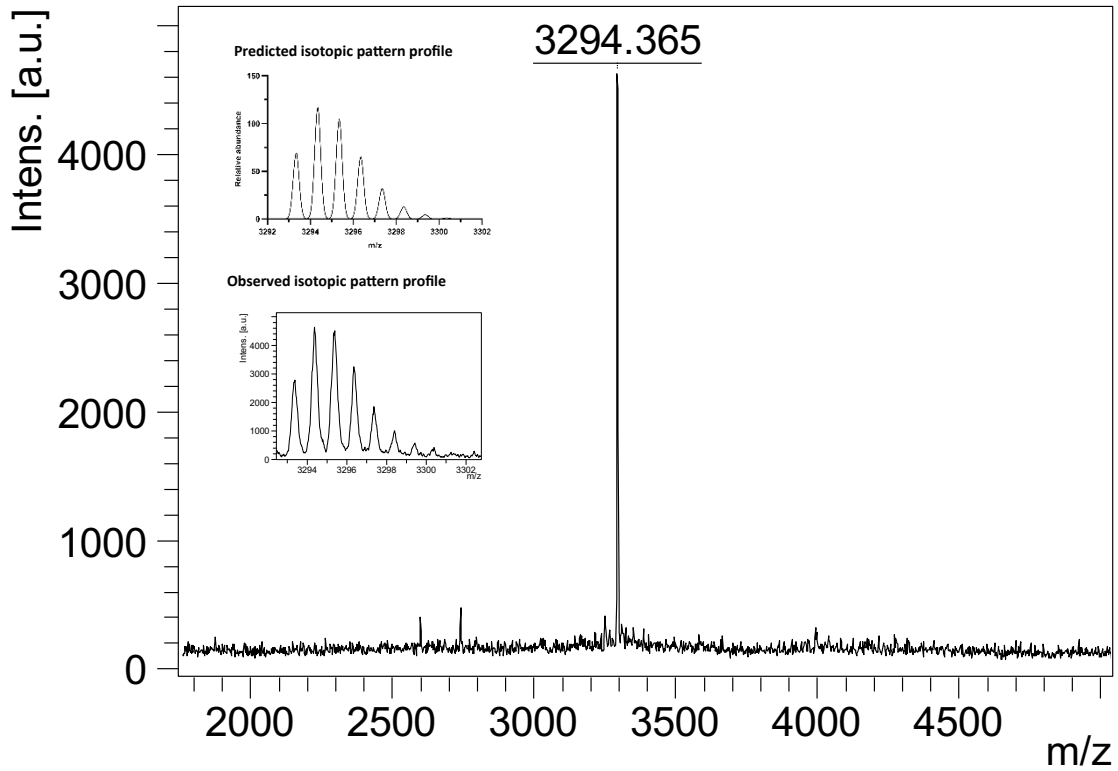

Copies of the SPR response curves and the 1:1 binding model fitting curves.

**DNA6-Bt on chip**

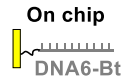

**PNA2-ach**

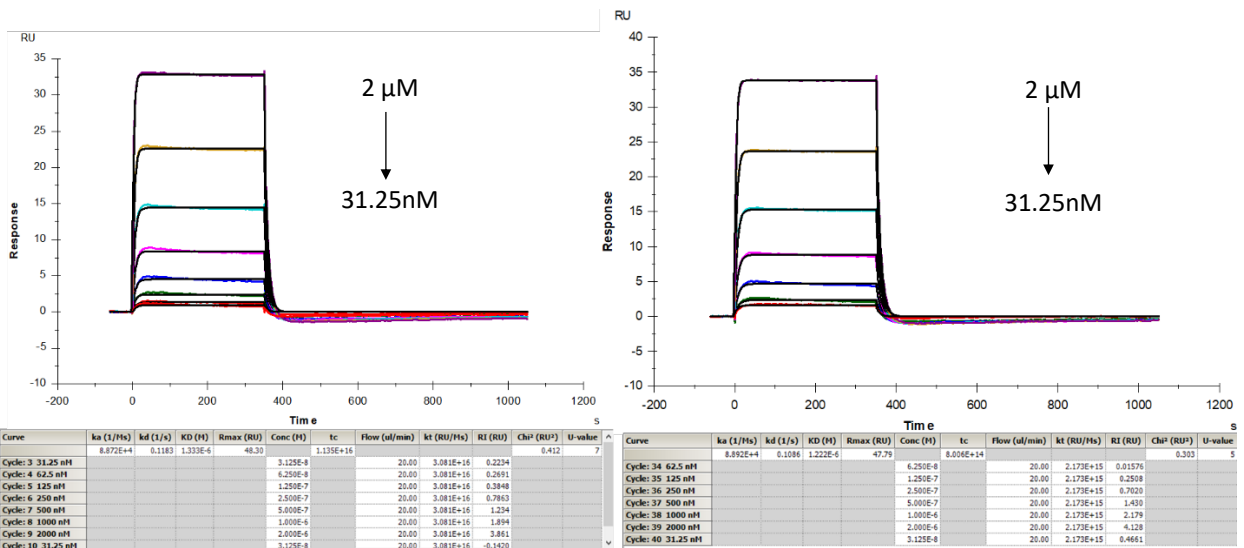

**PNA2-H1**

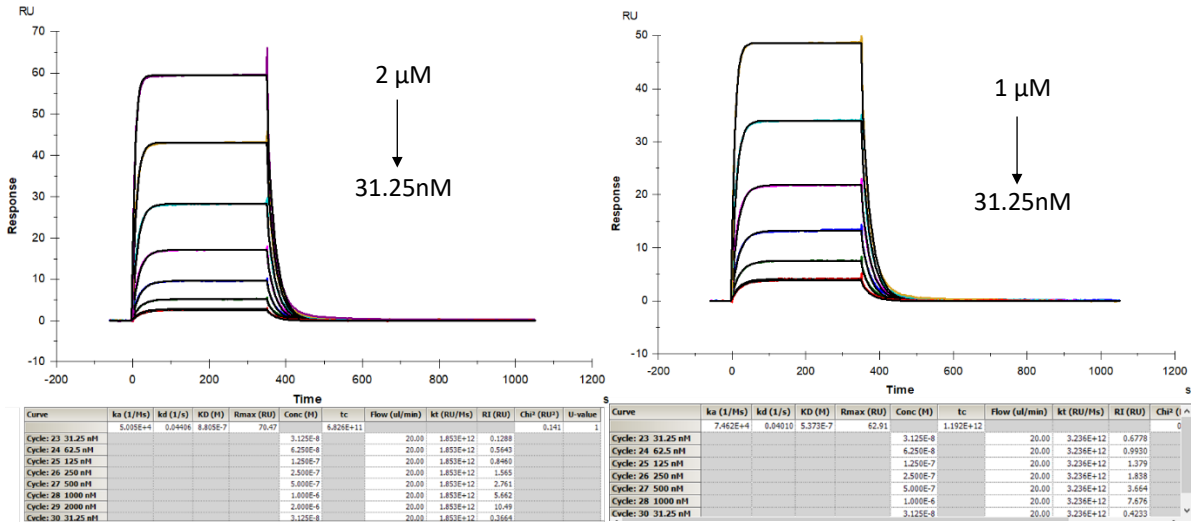

### PNA2-H3

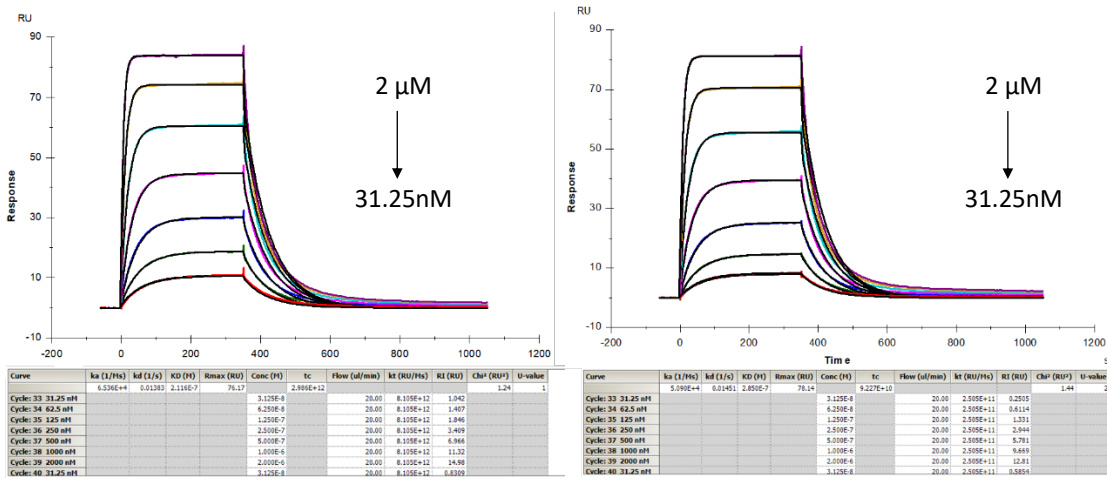

### PNA2-A3

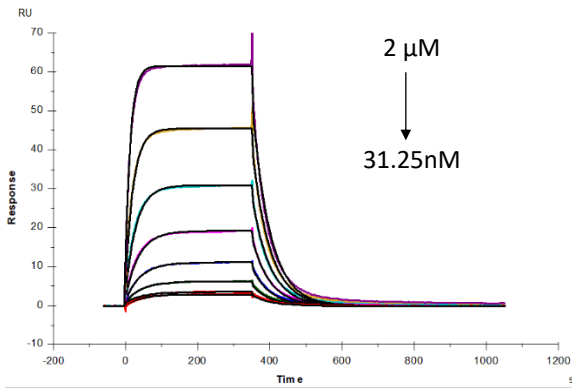

| Curve              | ka (1/Hz) | kd (1/s) | KD (M)   | Rmax (RU) | Conc (M) | tc       | Flow (ul/min) | kt (RU/Hz) | RI (RU) | Chi² (RU²) | U-value |
|--------------------|-----------|----------|----------|-----------|----------|----------|---------------|------------|---------|------------|---------|
| Cycle: 53 31.25 nM | 2.537E+4  | 0.02045  | 8.052E-7 | 73.08     | 3.125E-8 | 2.876E+8 | 20.00         | 7.802E+8   | 6.2314  | 0.435      | 2       |
| Cycle: 54 62.5 nM  |           |          |          | 6.250E-8  | 20.00    | 7.802E+8 | 20.00         | 7.802E+8   | 6.9803  |            |         |
| Cycle: 55 125 nM   |           |          |          | 1.250E-7  | 20.00    | 7.802E+8 | 20.00         | 7.802E+8   | 1.526   |            |         |
| Cycle: 56 250 nM   |           |          |          | 2.500E-7  | 20.00    | 7.802E+8 | 20.00         | 7.802E+8   | 1.896   |            |         |
| Cycle: 57 500 nM   |           |          |          | 5.000E-7  | 20.00    | 7.802E+8 | 20.00         | 7.802E+8   | 2.941   |            |         |
| Cycle: 58 1000 nM  |           |          |          | 1.000E-6  | 20.00    | 7.802E+8 | 20.00         | 7.802E+8   | 5.314   |            |         |
| Cycle: 59 2000 nM  |           |          |          | 2.000E-6  | 20.00    | 7.802E+8 | 20.00         | 7.802E+8   | 9.468   |            |         |
| Cycle: 60 31.25 nM |           |          |          | 3.125E-8  | 20.00    | 7.802E+8 | 20.00         | 7.802E+8   | 6.8246  |            |         |

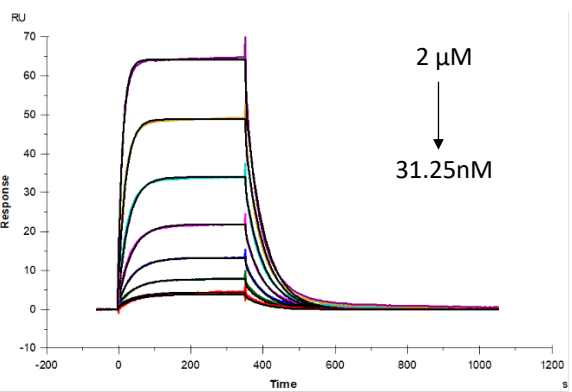

| Curve              | ka (1/Hz) | kd (1/s) | KD (M)   | Rmax (RU) | Conc (M) | tc       | Flow (ul/min) | kt (RU/Hz) | RI (RU) | Chi² (RU²) | U-value |
|--------------------|-----------|----------|----------|-----------|----------|----------|---------------|------------|---------|------------|---------|
| Cycle: 53 31.25 nM | 3.021E+4  | 0.01941  | 6.429E-7 | 71.68     | 3.125E-8 | 1.248E+8 | 20.00         | 3.389E+8   | 1.688   | 0.411      | 1       |
| Cycle: 54 62.5 nM  |           |          |          | 6.250E-8  | 20.00    | 3.389E+8 | 20.00         | 3.389E+8   | 1.502   |            |         |
| Cycle: 55 125 nM   |           |          |          | 1.250E-7  | 20.00    | 3.389E+8 | 20.00         | 3.389E+8   | 1.271   |            |         |
| Cycle: 56 250 nM   |           |          |          | 2.500E-7  | 20.00    | 3.389E+8 | 20.00         | 3.389E+8   | 1.984   |            |         |
| Cycle: 57 500 nM   |           |          |          | 5.000E-7  | 20.00    | 3.389E+8 | 20.00         | 3.389E+8   | 2.963   |            |         |
| Cycle: 58 1000 nM  |           |          |          | 1.000E-6  | 20.00    | 3.389E+8 | 20.00         | 3.389E+8   | 5.678   |            |         |
| Cycle: 59 2000 nM  |           |          |          | 2.000E-6  | 20.00    | 3.389E+8 | 20.00         | 3.389E+8   | 10.55   |            |         |
| Cycle: 60 31.25 nM |           |          |          | 3.125E-8  | 20.00    | 3.389E+8 | 20.00         | 3.389E+8   | 6.6645  |            |         |

### PNA2-N3

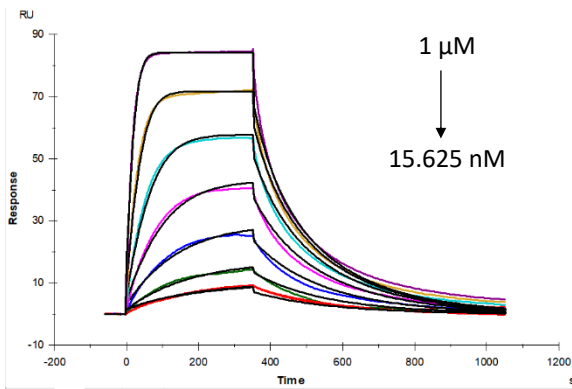

| Curve               | ka (1/Hz) | kd (1/s) | KD (M)   | Rmax (RU) | Conc (M) | tc       | Flow (ul/min) | kt (RU/Hz) | RI (RU) | Chi² (RU²) | U-value |
|---------------------|-----------|----------|----------|-----------|----------|----------|---------------|------------|---------|------------|---------|
| Cycle: 13 15.625 nM | 8.237E+4  | 0.01039  | 1.251E-7 | 77.48     | 1.562E-8 | 1.765E+8 | 20.00         | 4.792E+8   | 1.486   | 1.41       | 2       |
| Cycle: 14 31.25 nM  |           |          |          | 3.125E-8  | 20.00    | 4.792E+8 | 20.00         | 4.792E+8   | 1.603   |            |         |
| Cycle: 15 62.5 nM   |           |          |          | 6.250E-8  | 20.00    | 4.792E+8 | 20.00         | 4.792E+8   | 3.215   |            |         |
| Cycle: 16 125 nM    |           |          |          | 1.250E-7  | 20.00    | 4.792E+8 | 20.00         | 4.792E+8   | 6.487   |            |         |
| Cycle: 17 250 nM    |           |          |          | 2.500E-7  | 20.00    | 4.792E+8 | 20.00         | 4.792E+8   | 6.251   |            |         |
| Cycle: 18 500 nM    |           |          |          | 5.000E-7  | 20.00    | 4.792E+8 | 20.00         | 4.792E+8   | 9.801   |            |         |
| Cycle: 19 1000 nM   |           |          |          | 1.000E-6  | 20.00    | 4.792E+8 | 20.00         | 4.792E+8   | 15.33   |            |         |

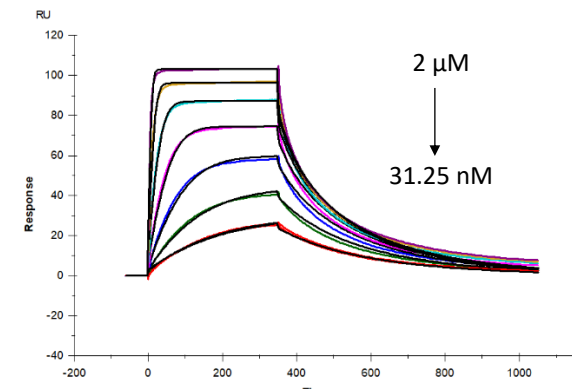

| Curve              | ka (1/Hz) | kd (1/s) | KD (M)   | Rmax (RU) | Conc (M) | tc       | Flow (ul/min) | kt (RU/Hz) | RI (RU) | Chi² (RU²) | U-value |
|--------------------|-----------|----------|----------|-----------|----------|----------|---------------|------------|---------|------------|---------|
| Cycle: 33 31.25 nM | 1.563E+5  | 0.01045  | 6.685E-8 | 84.73     | 3.125E-8 | 2.464E+8 | 20.00         | 6.689E+8   | 2.403   | 2.23       | 2       |
| Cycle: 34 62.5 nM  |           |          |          | 6.250E-8  | 20.00    | 6.689E+8 | 20.00         | 6.689E+8   | 3.104   |            |         |
| Cycle: 35 125 nM   |           |          |          | 1.250E-7  | 20.00    | 6.689E+8 | 20.00         | 6.689E+8   | 4.536   |            |         |
| Cycle: 36 250 nM   |           |          |          | 2.500E-7  | 20.00    | 6.689E+8 | 20.00         | 6.689E+8   | 7.566   |            |         |
| Cycle: 37 500 nM   |           |          |          | 5.000E-7  | 20.00    | 6.689E+8 | 20.00         | 6.689E+8   | 12.23   |            |         |
| Cycle: 38 1000 nM  |           |          |          | 1.000E-6  | 20.00    | 6.689E+8 | 20.00         | 6.689E+8   | 16.71   |            |         |
| Cycle: 39 2000 nM  |           |          |          | 2.000E-6  | 20.00    | 6.689E+8 | 20.00         | 6.689E+8   | 26.82   |            |         |

### PNA2-G3

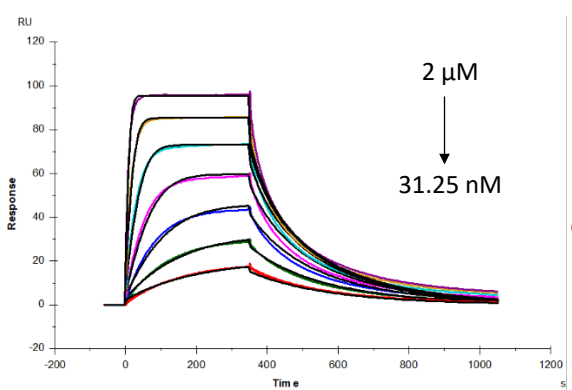

| Curve              | ka (1/Hz) | kd (1/s) | KD (M)   | Rmax (RU) | Conc (M) | tc       | Flow (ul/min) | kt (RU/Hz) | RI (RU) | Chi² (RU²) | U-value |
|--------------------|-----------|----------|----------|-----------|----------|----------|---------------|------------|---------|------------|---------|
| Cycle: 13 31.25 nM | 8.530E+4  | 0.01093  | 1.280E-7 | 78.83     | 3.125E-8 | 1.577E+8 | 20.00         | 4.552E+8   | 2.358   | 2.04       | 2       |
| Cycle: 14 62.5 nM  |           |          |          | 6.250E-8  | 20.00    | 4.552E+8 | 20.00         | 4.552E+8   | 3.193   |            |         |
| Cycle: 15 125 nM   |           |          |          | 1.250E-7  | 20.00    | 4.552E+8 | 20.00         | 4.552E+8   | 3.879   |            |         |
| Cycle: 16 250 nM   |           |          |          | 2.500E-7  | 20.00    | 4.552E+8 | 20.00         | 4.552E+8   | 4.807   |            |         |
| Cycle: 17 500 nM   |           |          |          | 5.000E-7  | 20.00    | 4.552E+8 | 20.00         | 4.552E+8   | 8.339   |            |         |
| Cycle: 18 1000 nM  |           |          |          | 1.000E-6  | 20.00    | 4.552E+8 | 20.00         | 4.552E+8   | 14.17   |            |         |
| Cycle: 19 2000 nM  |           |          |          | 2.000E-6  | 20.00    | 4.552E+8 | 20.00         | 4.552E+8   | 20.72   |            |         |
| Cycle: 20 31.25 nM |           |          |          | 3.125E-8  | 20.00    | 4.552E+8 | 20.00         | 4.552E+8   | 2.323   |            |         |

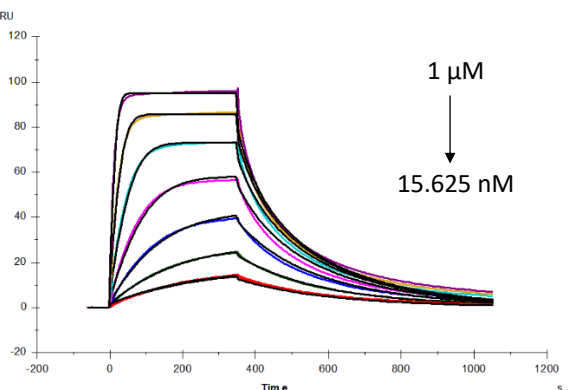

| Curve               | ka (1/Hz) | kd (1/s) | KD (M)   | Rmax (RU) | Conc (M) | tc       | Flow (ul/min) | kt (RU/Hz) | RI (RU) | Chi² (RU²) | U-value |
|---------------------|-----------|----------|----------|-----------|----------|----------|---------------|------------|---------|------------|---------|
| Cycle: 33 15.625 nM | 1.521E+5  | 0.01050  | 6.906E-8 | 84.40     | 1.562E-8 | 2.448E+8 | 20.00         | 6.624E+8   | 1.250   | 1.41       | 2       |
| Cycle: 34 31.25 nM  |           |          |          | 3.125E-8  | 20.00    | 6.624E+8 | 20.00         | 6.624E+8   | 1.894   |            |         |
| Cycle: 35 62.5 nM   |           |          |          | 6.250E-8  | 20.00    | 6.624E+8 | 20.00         | 6.624E+8   | 2.941   |            |         |
| Cycle: 36 125 nM    |           |          |          | 1.250E-7  | 20.00    | 6.624E+8 | 20.00         | 6.624E+8   | 3.861   |            |         |
| Cycle: 37 250 nM    |           |          |          | 2.500E-7  | 20.00    | 6.624E+8 | 20.00         | 6.624E+8   | 6.955   |            |         |
| Cycle: 38 500 nM    |           |          |          | 5.000E-7  | 20.00    | 6.624E+8 | 20.00         | 6.624E+8   | 11.45   |            |         |
| Cycle: 39 1000 nM   |           |          |          | 1.000E-6  | 20.00    | 6.624E+8 | 20.00         | 6.624E+8   | 16.14   |            |         |

### PNA2-P3



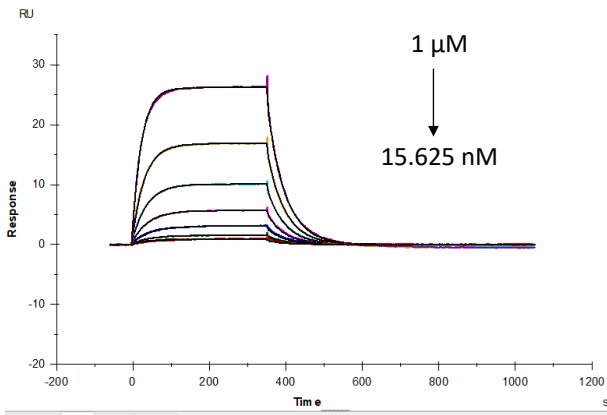

| Curve               | ka (1/Ms) | kd (1/s) | KD (M)   | Rmax (RU) | Conc (M) | tc       | Flow (ul/min) | kt (RU/Hz) | RI (RU) | Chi² (RU²) | U-value |
|---------------------|-----------|----------|----------|-----------|----------|----------|---------------|------------|---------|------------|---------|
| Cycle: 53 15.625 nM | 2.003E+4  | 0.02141  | 1.069E-6 | 49.07     | 1.563E-8 | 4.167E+8 | 20.00         | 1.131E+9   | 0.2328  | 0.0379     | 1       |
| Cycle: 54 31.25 nM  |           |          |          |           | 3.125E-8 |          | 20.00         | 1.131E+9   | 0.1563  |            |         |
| Cycle: 55 62.5 nM   |           |          |          |           | 6.250E-8 |          | 20.00         | 1.131E+9   | 0.3705  |            |         |
| Cycle: 56 125 nM    |           |          |          |           | 1.250E-7 |          | 20.00         | 1.131E+9   | 0.5474  |            |         |
| Cycle: 57 250 nM    |           |          |          |           | 2.500E-7 |          | 20.00         | 1.131E+9   | 0.8215  |            |         |
| Cycle: 58 500 nM    |           |          |          |           | 5.000E-7 |          | 20.00         | 1.131E+9   | 1.192   |            |         |
| Cycle: 59 1000 nM   |           |          |          |           | 1.000E-6 |          | 20.00         | 1.131E+9   | 2.464   |            |         |
| Cycle: 60 15.625 nM |           |          |          |           | 1.563E-8 |          | 20.00         | 1.131E+9   | 0.1382  |            |         |

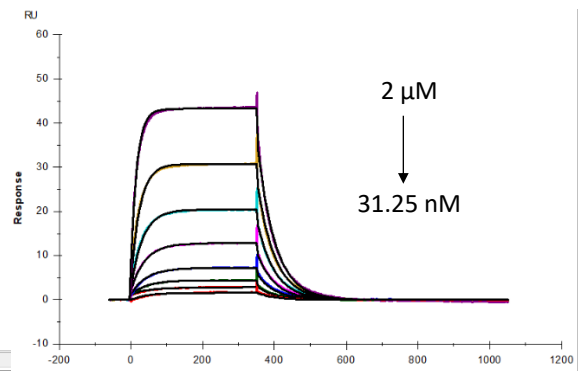

| Curve              | ka (1/Ms) | kd (1/s) | KD (M)   | Rmax (RU) | Conc (M) | tc        | Flow (ul/min) | kt (RU/Hz) | RI (RU) | Chi² (RU²) | U-value |
|--------------------|-----------|----------|----------|-----------|----------|-----------|---------------|------------|---------|------------|---------|
| Cycle: 53 31.25 nM | 1.960E+4  | 0.02050  | 1.046E-6 | 56.18     | 3.125E-8 | 1.087E+10 | 20.00         | 2.890E+10  | 1.180   | 0.159      | 1       |
| Cycle: 54 62.5 nM  |           |          |          |           | 6.250E-8 |           | 20.00         | 2.890E+10  | 1.279   |            |         |
| Cycle: 55 125 nM   |           |          |          |           | 1.250E-7 |           | 20.00         | 2.890E+10  | 1.241   |            |         |
| Cycle: 56 250 nM   |           |          |          |           | 2.500E-7 |           | 20.00         | 2.890E+10  | 1.992   |            |         |
| Cycle: 57 500 nM   |           |          |          |           | 5.000E-7 |           | 20.00         | 2.890E+10  | 2.391   |            |         |
| Cycle: 58 1000 nM  |           |          |          |           | 1.000E-6 |           | 20.00         | 2.890E+10  | 3.320   |            |         |
| Cycle: 59 2000 nM  |           |          |          |           | 2.000E-6 |           | 20.00         | 2.890E+10  | 6.399   |            |         |
| Cycle: 60 31.25 nM |           |          |          |           | 3.125E-8 |           | 20.00         | 2.890E+10  | 0.1544  |            |         |

## DNA8

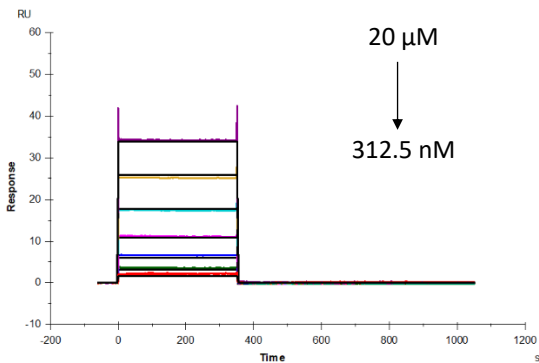

| Curve              | ka (1/Ms) | kd (1/s) | KD (M)   | Rmax (RU) | Conc (M) | Chi² (RU²) | U-value |
|--------------------|-----------|----------|----------|-----------|----------|------------|---------|
| Cycle: 23 312.5 nM | 3.739E+5  | 3.250    | 8.692E-6 | 48.53     | 3.125E-7 | 0.777      | N/A     |
| Cycle: 24 625 nM   |           |          |          |           | 6.250E-7 |            |         |
| Cycle: 25 1250 nM  |           |          |          |           | 1.250E-6 |            |         |
| Cycle: 26 2500 nM  |           |          |          |           | 2.500E-6 |            |         |
| Cycle: 27 5000 nM  |           |          |          |           | 5.000E-6 |            |         |
| Cycle: 28 10000 nM |           |          |          |           | 1.000E-5 |            |         |
| Cycle: 29 20000 nM |           |          |          |           | 2.000E-5 |            |         |
| Cycle: 30 312.5 nM |           |          |          |           | 3.125E-7 |            |         |

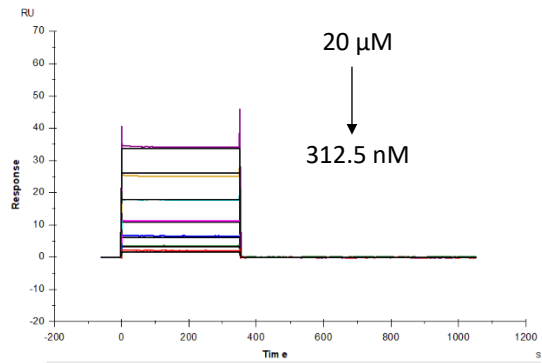

| Curve              | ka (1/Ms) | kd (1/s) | KD (M)   | Rmax (RU) | Conc (M) | Chi² (RU²) | U-value |
|--------------------|-----------|----------|----------|-----------|----------|------------|---------|
| Cycle: 53 312.5 nM | 3.970E+5  | 3.335    | 8.400E-6 | 47.96     | 3.125E-7 | 0.805      | N/A     |
| Cycle: 54 625 nM   |           |          |          |           | 6.250E-7 |            |         |
| Cycle: 55 1250 nM  |           |          |          |           | 1.250E-6 |            |         |
| Cycle: 56 2500 nM  |           |          |          |           | 2.500E-6 |            |         |
| Cycle: 57 5000 nM  |           |          |          |           | 5.000E-6 |            |         |
| Cycle: 58 10000 nM |           |          |          |           | 1.000E-5 |            |         |
| Cycle: 59 20000 nM |           |          |          |           | 2.000E-5 |            |         |
| Cycle: 60 312.5 nM |           |          |          |           | 3.125E-7 |            |         |

## PNA2-pc-ach

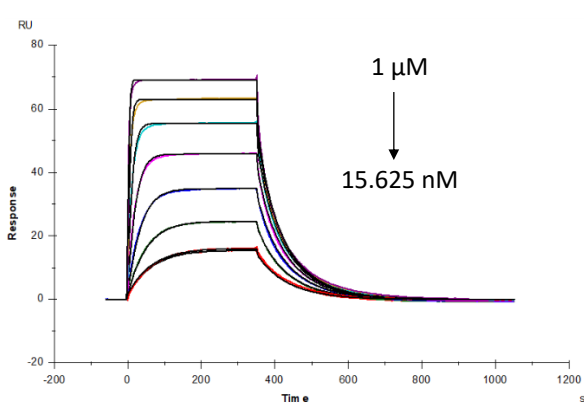

| Curve               | ka (1/Ms) | kd (1/s) | KD (M)   | Rmax (RU) | Conc (M) | tc       | Flow (ul/min) | kt (RU/Hz) | RI (RU) | Chi² (RU²) | U-value |
|---------------------|-----------|----------|----------|-----------|----------|----------|---------------|------------|---------|------------|---------|
| Cycle: 13 15.625 nM | 3.860E+5  | 0.01873  | 4.854E-8 | 58.76     | 1.563E-8 | 1.247E+7 | 20.00         | 3.394E+7   | 1.212   | 0.287      | 1       |
| Cycle: 14 31.25 nM  |           |          |          |           | 3.125E-8 |          | 20.00         | 3.394E+7   | 1.607   |            |         |
| Cycle: 15 62.5 nM   |           |          |          |           | 6.250E-8 |          | 20.00         | 3.394E+7   | 1.825   |            |         |
| Cycle: 16 125 nM    |           |          |          |           | 1.250E-7 |          | 20.00         | 3.394E+7   | 3.467   |            |         |
| Cycle: 17 250 nM    |           |          |          |           | 2.500E-7 |          | 20.00         | 3.394E+7   | 6.189   |            |         |
| Cycle: 18 500 nM    |           |          |          |           | 5.000E-7 |          | 20.00         | 3.394E+7   | 9.595   |            |         |
| Cycle: 19 1000 nM   |           |          |          |           | 1.000E-6 |          | 20.00         | 3.394E+7   | 13.13   |            |         |
| Cycle: 20 15.625 nM |           |          |          |           | 1.563E-8 |          | 20.00         | 3.394E+7   | 1.732   |            |         |

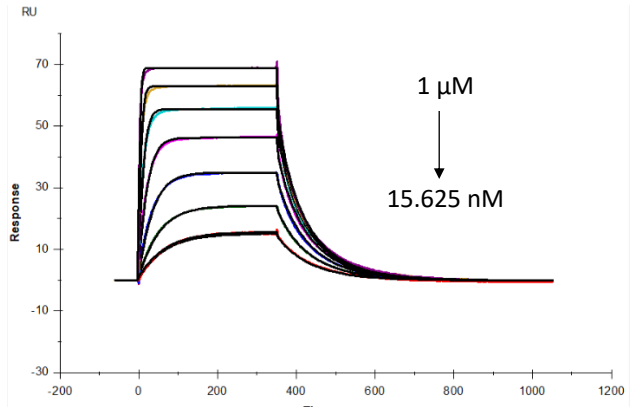

| Curve               | ka (1/Ms) | kd (1/s) | KD (M)   | Rmax (RU) | Conc (M) | tc       | Flow (ul/min) | kt (RU/Hz) | RI (RU) | Chi² (RU²) | U-value |
|---------------------|-----------|----------|----------|-----------|----------|----------|---------------|------------|---------|------------|---------|
| Cycle: 43 15.625 nM | 3.902E+5  | 0.01862  | 4.771E-8 | 58.50     | 1.563E-8 | 1.168E+7 | 20.00         | 3.171E+7   | 0.6966  | 0.246      | 1       |
| Cycle: 44 31.25 nM  |           |          |          |           | 3.125E-8 |          | 20.00         | 3.171E+7   | 1.098   |            |         |
| Cycle: 45 62.5 nM   |           |          |          |           | 6.250E-8 |          | 20.00         | 3.171E+7   | 1.733   |            |         |
| Cycle: 46 125 nM    |           |          |          |           | 1.250E-7 |          | 20.00         | 3.171E+7   | 3.874   |            |         |
| Cycle: 47 250 nM    |           |          |          |           | 2.500E-7 |          | 20.00         | 3.171E+7   | 6.363   |            |         |
| Cycle: 48 500 nM    |           |          |          |           | 5.000E-7 |          | 20.00         | 3.171E+7   | 9.526   |            |         |
| Cycle: 49 1000 nM   |           |          |          |           | 1.000E-6 |          | 20.00         | 3.171E+7   | 12.93   |            |         |
| Cycle: 50 15.625 nM |           |          |          |           | 1.563E-8 |          | 20.00         | 3.171E+7   | 1.198   |            |         |

### PNA2-pc-H3

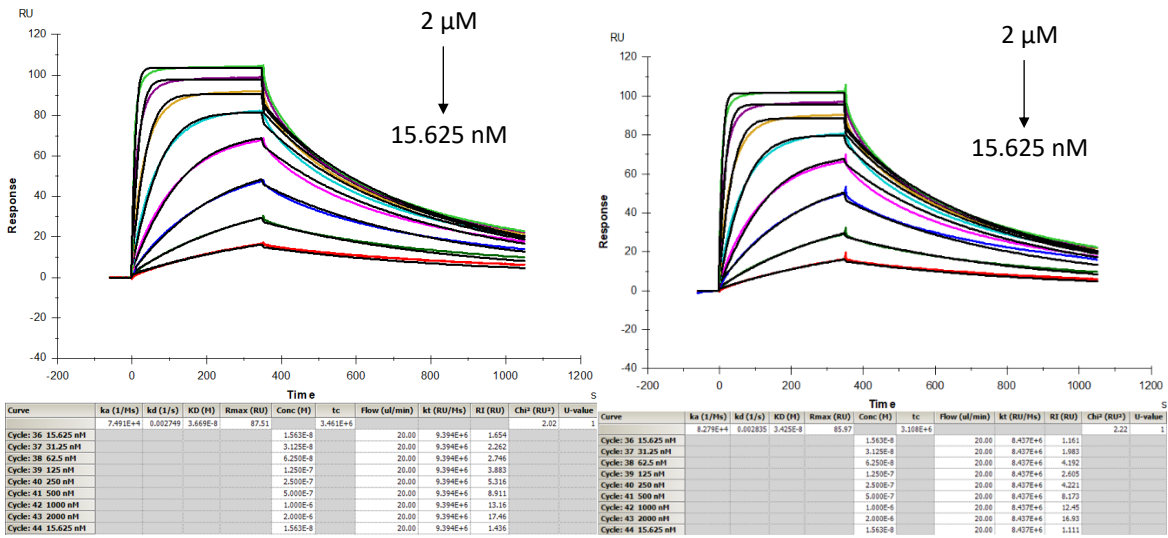

### PNA2-pc-A1

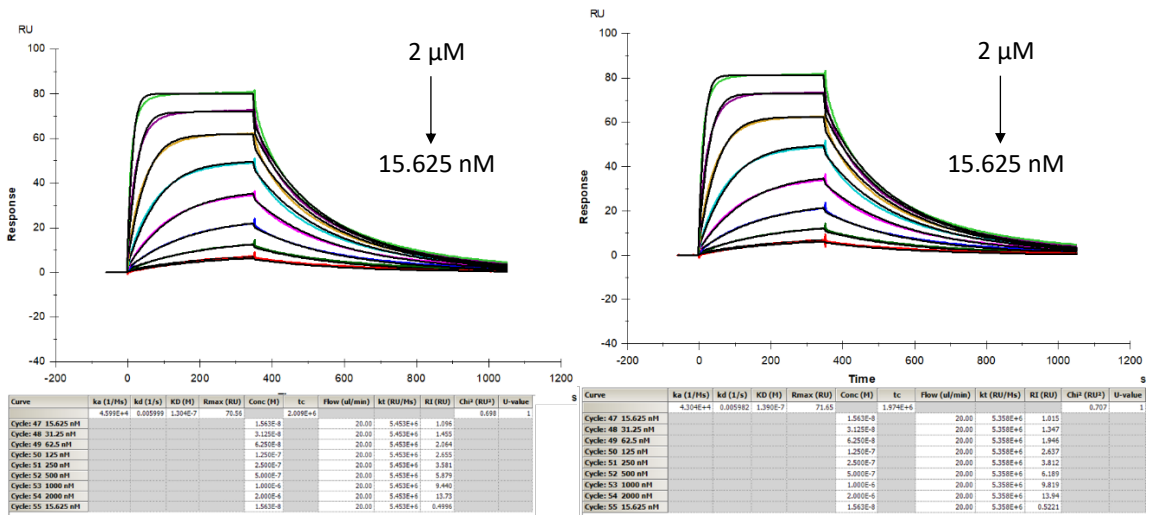

### PNA2-pc-A3

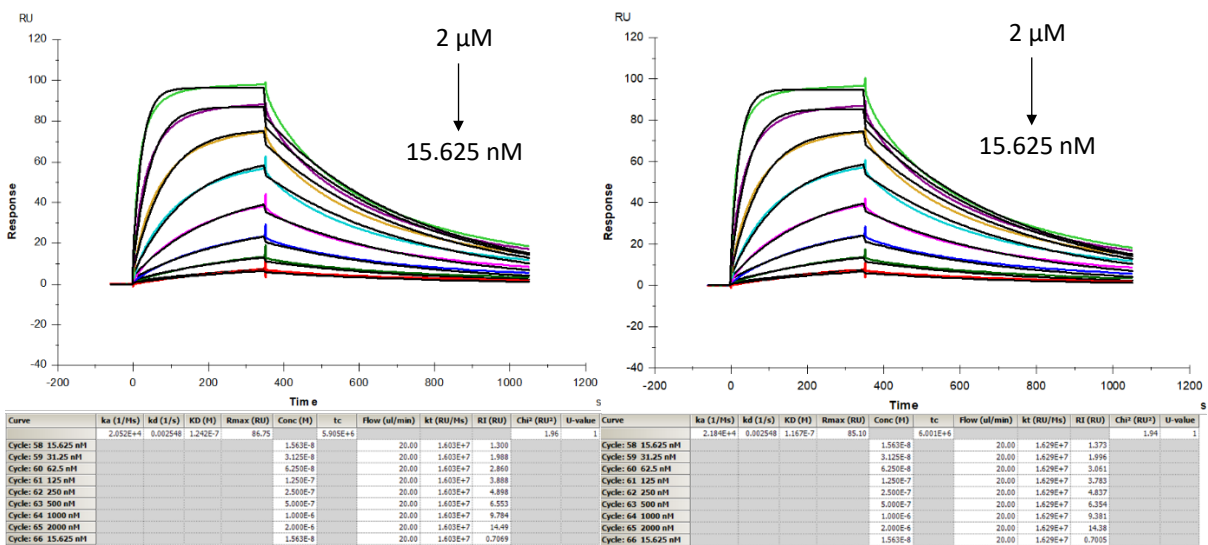

# PNA3-Bt on chip

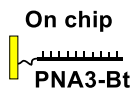

## PNA2-ach

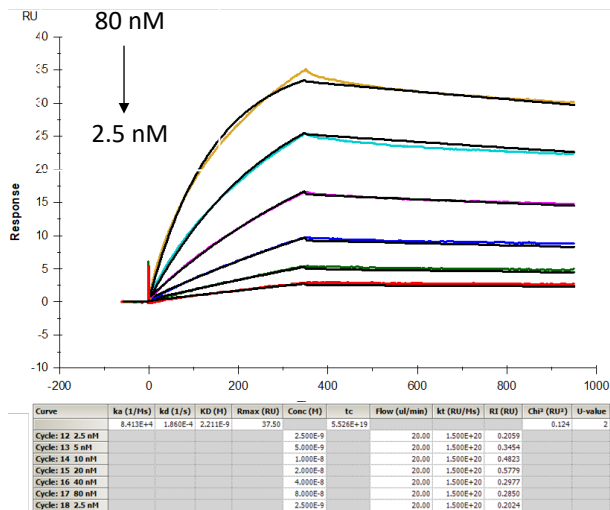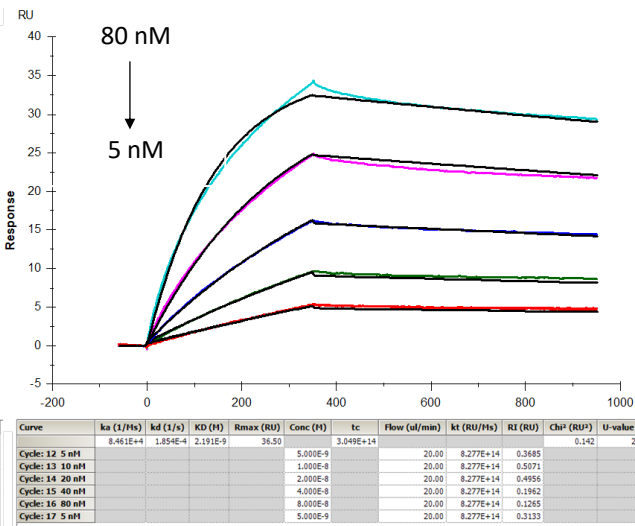

## PNA2-H1

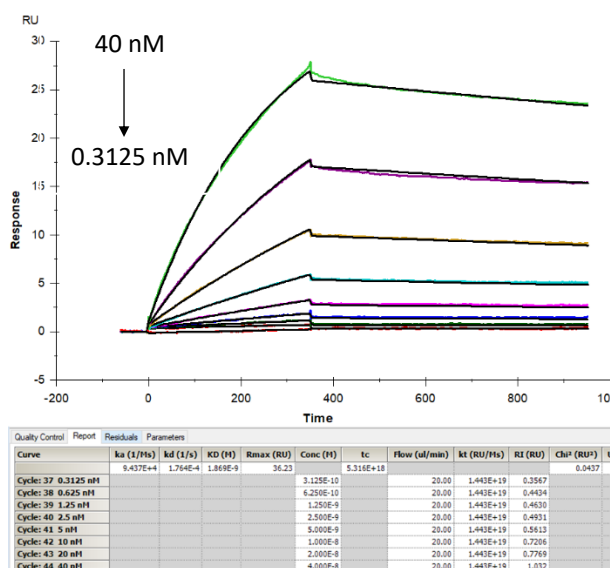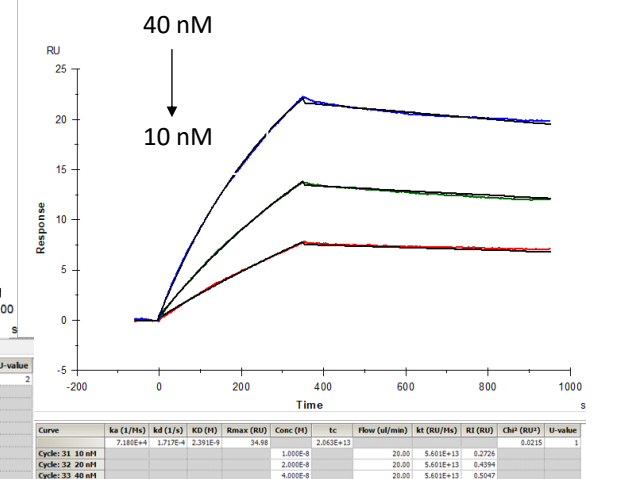

### PNA2-H3

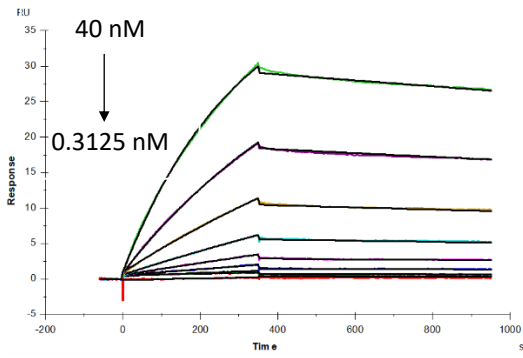

| Curve               | ka (1/Hz) | kd (1/s) | KD (M)   | Rmax (RU) | Conc (M)  | tc        | Flow (ul/min) | kt (RU/Hz) | RI (RU) | Chi² (RU²) | U-value |
|---------------------|-----------|----------|----------|-----------|-----------|-----------|---------------|------------|---------|------------|---------|
| Cycle: 48 0.3125 nM | 7.968E+4  | 1.49E+4  | 1.875E-9 | 44.11     | 3.125E-10 | 2.512E+17 | 20.00         | 6.818E+17  | 0.5395  | 0.0668     | 3       |
| Cycle: 49 0.625 nM  |           |          |          |           | 6.250E-10 |           | 20.00         | 6.818E+17  | 0.4462  |            |         |
| Cycle: 50 1.25 nM   |           |          |          |           | 1.250E-9  |           | 20.00         | 6.818E+17  | 0.5566  |            |         |
| Cycle: 51 2.5 nM    |           |          |          |           | 2.500E-9  |           | 20.00         | 6.818E+17  | 0.5892  |            |         |
| Cycle: 52 5 nM      |           |          |          |           | 5.000E-9  |           | 20.00         | 6.818E+17  | 0.6423  |            |         |
| Cycle: 53 10 nM     |           |          |          |           | 1.000E-8  |           | 20.00         | 6.818E+17  | 0.6734  |            |         |
| Cycle: 54 20 nM     |           |          |          |           | 2.000E-8  |           | 20.00         | 6.818E+17  | 0.6853  |            |         |
| Cycle: 55 40 nM     |           |          |          |           | 4.000E-8  |           | 20.00         | 6.818E+17  | 1.012   |            |         |

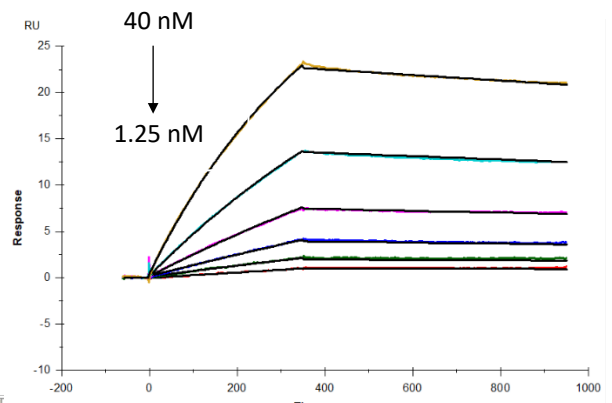

| Curve             | ka (1/Hz) | kd (1/s) | KD (M)   | Rmax (RU) | Conc (M) | tc        | Flow (ul/min) | kt (RU/Hz) | RI (RU)  | Chi² (RU²) | U-value |
|-------------------|-----------|----------|----------|-----------|----------|-----------|---------------|------------|----------|------------|---------|
| Cycle: 39 1.25 nM | 5.849E+4  | 1.381E+4 | 2.361E-9 | 41.31     | 1.250E-9 | 1.609E+17 | 20.00         | 4.367E+17  | -0.01018 | 0.0142     | 2       |
| Cycle: 40 2.5 nM  |           |          |          |           | 2.500E-9 |           | 20.00         | 4.367E+17  | 0.1462   |            |         |
| Cycle: 41 5 nM    |           |          |          |           | 5.000E-9 |           | 20.00         | 4.367E+17  | 0.1882   |            |         |
| Cycle: 42 10 nM   |           |          |          |           | 1.000E-8 |           | 20.00         | 4.367E+17  | 0.1793   |            |         |
| Cycle: 43 20 nM   |           |          |          |           | 2.000E-8 |           | 20.00         | 4.367E+17  | 0.1857   |            |         |
| Cycle: 44 40 nM   |           |          |          |           | 4.000E-8 |           | 20.00         | 4.367E+17  | 0.3908   |            |         |

### PNA2-A3

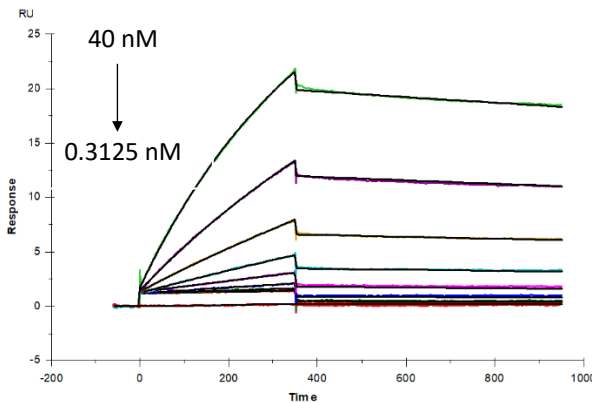

| Curve               | ka (1/Hz) | kd (1/s) | KD (M)   | Rmax (RU) | Conc (M)  | tc        | Flow (ul/min) | kt (RU/Hz) | RI (RU) | Chi² (RU²) | U-value |
|---------------------|-----------|----------|----------|-----------|-----------|-----------|---------------|------------|---------|------------|---------|
| Cycle: 70 0.3125 nM | 5.472E+4  | 1.350E+4 | 2.286E-9 | 35.77     | 3.125E-10 | 5.136E+12 | 20.00         | 1.394E+13  | 1.194   | 0.187      | 9       |
| Cycle: 71 0.625 nM  |           |          |          |           | 6.250E-10 |           | 20.00         | 1.394E+13  | 1.194   |            |         |
| Cycle: 72 1.25 nM   |           |          |          |           | 1.250E-9  |           | 20.00         | 1.394E+13  | 1.203   |            |         |
| Cycle: 73 2.5 nM    |           |          |          |           | 2.500E-9  |           | 20.00         | 1.394E+13  | 1.307   |            |         |
| Cycle: 74 5 nM      |           |          |          |           | 5.000E-9  |           | 20.00         | 1.394E+13  | 1.254   |            |         |
| Cycle: 75 10 nM     |           |          |          |           | 1.000E-8  |           | 20.00         | 1.394E+13  | 1.374   |            |         |
| Cycle: 76 20 nM     |           |          |          |           | 2.000E-8  |           | 20.00         | 1.394E+13  | 1.463   |            |         |
| Cycle: 77 40 nM     |           |          |          |           | 4.000E-8  |           | 20.00         | 1.394E+13  | 1.751   |            |         |

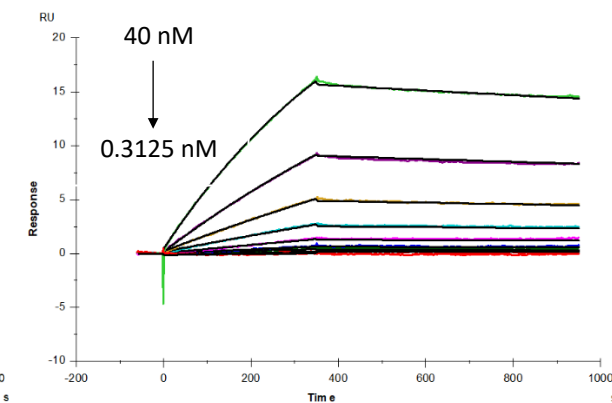

| Curve               | ka (1/Hz) | kd (1/s) | KD (M)   | Rmax (RU) | Conc (M)  | tc        | Flow (ul/min) | kt (RU/Hz) | RI (RU)  | Chi² (RU²) | U-value |
|---------------------|-----------|----------|----------|-----------|-----------|-----------|---------------|------------|----------|------------|---------|
| Cycle: 59 0.3125 nM | 4.562E+4  | 1.403E+4 | 3.141E-9 | 33.91     | 3.125E-10 | 6.488E+14 | 20.00         | 2.575E+15  | 3.942E-4 | 0.0126     | 3       |
| Cycle: 60 0.625 nM  |           |          |          |           | 6.250E-10 |           | 20.00         | 2.575E+15  | 0.68497  |            |         |
| Cycle: 61 1.25 nM   |           |          |          |           | 1.250E-9  |           | 20.00         | 2.575E+15  | 0.009189 |            |         |
| Cycle: 62 2.5 nM    |           |          |          |           | 2.500E-9  |           | 20.00         | 2.575E+15  | 0.04633  |            |         |
| Cycle: 63 5 nM      |           |          |          |           | 5.000E-9  |           | 20.00         | 2.575E+15  | 0.1697   |            |         |
| Cycle: 64 10 nM     |           |          |          |           | 1.000E-8  |           | 20.00         | 2.575E+15  | 0.2155   |            |         |
| Cycle: 65 20 nM     |           |          |          |           | 2.000E-8  |           | 20.00         | 2.575E+15  | 0.1516   |            |         |
| Cycle: 66 40 nM     |           |          |          |           | 4.000E-8  |           | 20.00         | 2.575E+15  | 0.4059   |            |         |

### PNA2-N3

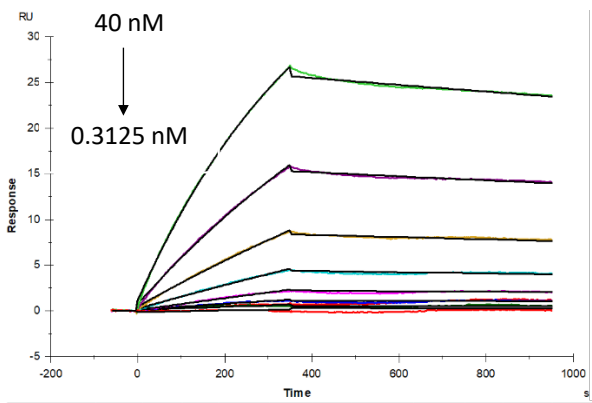

| Curve               | ka (1/Hz) | kd (1/s) | KD (M)   | Rmax (RU) | Conc (M)  | tc       | Flow (ul/min) | kt (RU/Hz) | RI (RU) | Chi² (RU²) | U-value |
|---------------------|-----------|----------|----------|-----------|-----------|----------|---------------|------------|---------|------------|---------|
| Cycle: 15 0.3125 nM | 5.603E+4  | 1.513E+4 | 2.672E-9 | 48.16     | 3.125E-10 | 8.894E+7 | 20.00         | 2.403E+8   | 0.3342  | 0.0586     | 4       |
| Cycle: 16 0.625 nM  |           |          |          |           | 6.250E-10 |          | 20.00         | 2.403E+8   | 0.1136  |            |         |
| Cycle: 17 1.25 nM   |           |          |          |           | 1.250E-9  |          | 20.00         | 2.403E+8   | 0.1103  |            |         |
| Cycle: 18 2.5 nM    |           |          |          |           | 2.500E-9  |          | 20.00         | 2.403E+8   | 0.08813 |            |         |
| Cycle: 19 5 nM      |           |          |          |           | 5.000E-9  |          | 20.00         | 2.403E+8   | 0.2414  |            |         |
| Cycle: 20 10 nM     |           |          |          |           | 1.000E-8  |          | 20.00         | 2.403E+8   | 0.4646  |            |         |
| Cycle: 21 20 nM     |           |          |          |           | 2.000E-8  |          | 20.00         | 2.403E+8   | 0.7589  |            |         |
| Cycle: 22 40 nM     |           |          |          |           | 4.000E-8  |          | 20.00         | 2.403E+8   | 1.126   |            |         |

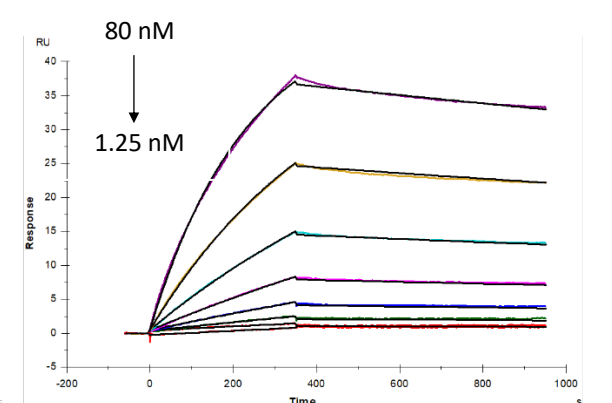

| Curve             | ka (1/Hz) | kd (1/s) | KD (M)   | Rmax (RU) | Conc (M) | tc        | Flow (ul/min) | kt (RU/Hz) | RI (RU) | Chi² (RU²) | U-value |
|-------------------|-----------|----------|----------|-----------|----------|-----------|---------------|------------|---------|------------|---------|
| Cycle: 14 1.25 nM | 5.266E+4  | 1.766E+4 | 3.357E-9 | 48.87     | 1.250E-9 | 1.164E+16 | 20.00         | 3.159E+16  | 0.4195  | 0.0407     | 2       |
| Cycle: 15 2.5 nM  |           |          |          |           | 2.500E-9 |           | 20.00         | 3.159E+16  | 0.4000  |            |         |
| Cycle: 16 5 nM    |           |          |          |           | 5.000E-9 |           | 20.00         | 3.159E+16  | 0.4920  |            |         |
| Cycle: 17 10 nM   |           |          |          |           | 1.000E-8 |           | 20.00         | 3.159E+16  | 0.4726  |            |         |
| Cycle: 18 20 nM   |           |          |          |           | 2.000E-8 |           | 20.00         | 3.159E+16  | 0.5161  |            |         |
| Cycle: 19 40 nM   |           |          |          |           | 4.000E-8 |           | 20.00         | 3.159E+16  | 0.5127  |            |         |
| Cycle: 20 80 nM   |           |          |          |           | 8.000E-8 |           | 20.00         | 3.159E+16  | 0.5382  |            |         |
| Cycle: 21 1.25 nM |           |          |          |           | 1.250E-9 |           | 20.00         | 3.159E+16  | -0.2310 |            |         |

### PNA2-G3

40 nM

0.3125 nM

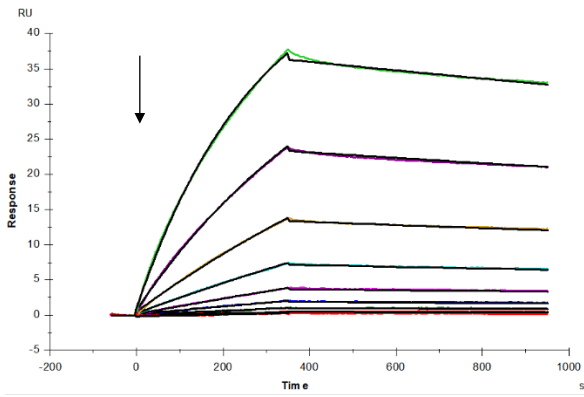

| Curve               | ka (1/Hz) | kd (1/s) | KD (M)  | Rmax (RU) | Conc (M)  | tc        | Flow (ul/min) | kt (RU/Hz) | RI (RU)   | Chi² (RU²) | U-value |
|---------------------|-----------|----------|---------|-----------|-----------|-----------|---------------|------------|-----------|------------|---------|
| Cycle: 37 0.3125 nM | 6.49E+4   | 1.70E+1  | 2.01E-9 | 53.40     | 3.125E-10 | 1.922E+17 | 20.00         | 5.21E+17   | -0.803214 | 0.0193     | 1       |
| Cycle: 38 0.625 nM  |           |          |         |           | 6.25E-10  |           | 20.00         | 5.21E+17   | 0.88495   |            |         |
| Cycle: 39 1.25 nM   |           |          |         |           | 1.25E-9   |           | 20.00         | 5.21E+17   | 0.1522    |            |         |
| Cycle: 40 2.5 nM    |           |          |         |           | 2.5E-9    |           | 20.00         | 5.21E+17   | 0.1803    |            |         |
| Cycle: 41 5 nM      |           |          |         |           | 5.00E-9   |           | 20.00         | 5.21E+17   | 0.2688    |            |         |
| Cycle: 42 10 nM     |           |          |         |           | 1.00E-8   |           | 20.00         | 5.21E+17   | 0.5563    |            |         |
| Cycle: 43 20 nM     |           |          |         |           | 2.00E-8   |           | 20.00         | 5.21E+17   | 0.7709    |            |         |
| Cycle: 44 40 nM     |           |          |         |           | 4.00E-8   |           | 20.00         | 5.21E+17   | 1.621     |            |         |

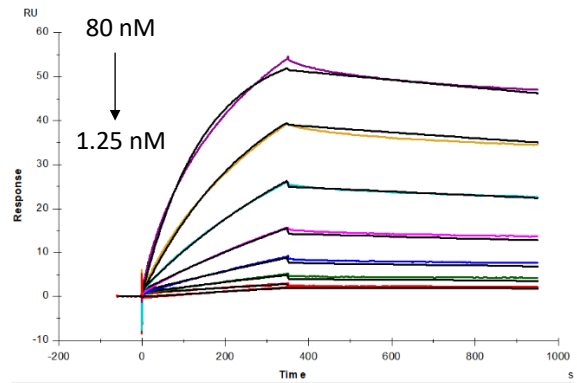

| Curve             | ka (1/Hz) | kd (1/s) | KD (M)  | Rmax (RU) | Conc (M) | tc        | Flow (ul/min) | kt (RU/Hz) | RI (RU)  | Chi² (RU²) | U-value |
|-------------------|-----------|----------|---------|-----------|----------|-----------|---------------|------------|----------|------------|---------|
| Cycle: 34 1.25 nM | 6.28E+4   | 1.80E+1  | 2.17E-9 | 58.31     | 1.25E-9  | 2.216E+17 | 20.00         | 6.01E+17   | 0.8208   | 6.32E-4    | 3       |
| Cycle: 35 2.5 nM  |           |          |         |           | 2.50E-9  |           | 20.00         | 6.01E+17   | 0.8559   |            |         |
| Cycle: 36 5 nM    |           |          |         |           | 5.00E-9  |           | 20.00         | 6.01E+17   | 1.199    |            |         |
| Cycle: 37 10 nM   |           |          |         |           | 1.00E-8  |           | 20.00         | 6.01E+17   | 1.377    |            |         |
| Cycle: 38 20 nM   |           |          |         |           | 2.00E-8  |           | 20.00         | 6.01E+17   | 1.474    |            |         |
| Cycle: 39 40 nM   |           |          |         |           | 4.00E-8  |           | 20.00         | 6.01E+17   | 0.6323   |            |         |
| Cycle: 40 80 nM   |           |          |         |           | 8.00E-8  |           | 20.00         | 6.01E+17   | 0.4646   |            |         |
| Cycle: 41 1.25 nM |           |          |         |           | 1.25E-9  |           | 20.00         | 6.01E+17   | -0.66564 |            |         |

### PNA2-P3

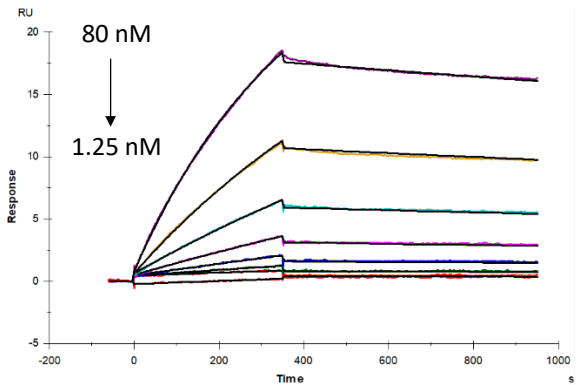

| Curve             | ka (1/Hz) | kd (1/s) | KD (M)   | Rmax (RU) | Conc (M) | tc        | Flow (ul/min) | kt (RU/Hz) | RI (RU) | Chi² (RU²) | U-value |
|-------------------|-----------|----------|----------|-----------|----------|-----------|---------------|------------|---------|------------|---------|
| Cycle: 24 1.25 nM | 3.143E+4  | 1.519E+1 | 4.833E-9 | 30.71     | 1.25E-9  | 9.792E+14 | 20.00         | 2.65E+15   | 0.4590  | 0.0284     | 3       |
| Cycle: 25 2.5 nM  |           |          |          |           | 2.50E-9  |           | 20.00         | 2.65E+15   | 0.4422  |            |         |
| Cycle: 26 5 nM    |           |          |          |           | 5.00E-9  |           | 20.00         | 2.65E+15   | 0.4740  |            |         |
| Cycle: 27 10 nM   |           |          |          |           | 1.00E-8  |           | 20.00         | 2.65E+15   | 0.5241  |            |         |
| Cycle: 28 20 nM   |           |          |          |           | 2.00E-8  |           | 20.00         | 2.65E+15   | 0.5343  |            |         |
| Cycle: 29 40 nM   |           |          |          |           | 4.00E-8  |           | 20.00         | 2.65E+15   | 0.6417  |            |         |
| Cycle: 30 80 nM   |           |          |          |           | 8.00E-8  |           | 20.00         | 2.65E+15   | 0.8215  |            |         |
| Cycle: 31 1.25 nM |           |          |          |           | 1.25E-9  |           | 20.00         | 2.65E+15   | -0.2055 |            |         |

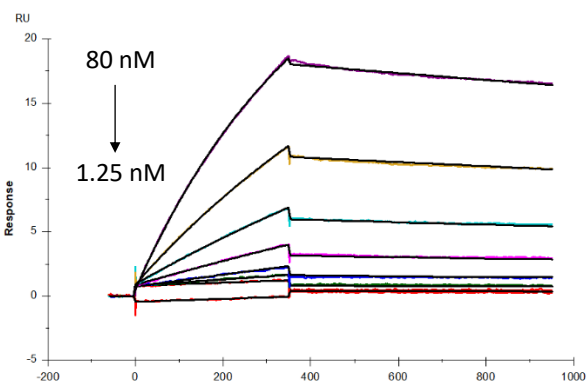

| Curve             | ka (1/Hz) | kd (1/s) | KD (M)   | Rmax (RU) | Conc (M) | tc       | Flow (ul/min) | kt (RU/Hz) | RI (RU) | Chi² (RU²) | U-value |
|-------------------|-----------|----------|----------|-----------|----------|----------|---------------|------------|---------|------------|---------|
| Cycle: 54 1.25 nM | 2.64E+4   | 1.542E+1 | 5.311E-9 | 32.85     | 1.25E-9  | 4.28E+15 | 20.00         | 1.163E+16  | 0.8124  | 0.0639     | 5       |
| Cycle: 55 2.5 nM  |           |          |          |           | 2.50E-9  |          | 20.00         | 1.163E+16  | 0.8241  |            |         |
| Cycle: 56 5 nM    |           |          |          |           | 5.00E-9  |          | 20.00         | 1.163E+16  | 0.7278  |            |         |
| Cycle: 57 10 nM   |           |          |          |           | 1.00E-8  |          | 20.00         | 1.163E+16  | 0.8819  |            |         |
| Cycle: 58 20 nM   |           |          |          |           | 2.00E-8  |          | 20.00         | 1.163E+16  | 0.9424  |            |         |
| Cycle: 59 40 nM   |           |          |          |           | 4.00E-8  |          | 20.00         | 1.163E+16  | 0.8953  |            |         |
| Cycle: 60 80 nM   |           |          |          |           | 8.00E-8  |          | 20.00         | 1.163E+16  | 0.5166  |            |         |
| Cycle: 61 1.25 nM |           |          |          |           | 1.25E-9  |          | 20.00         | 1.163E+16  | -0.4483 |            |         |

### DNA8

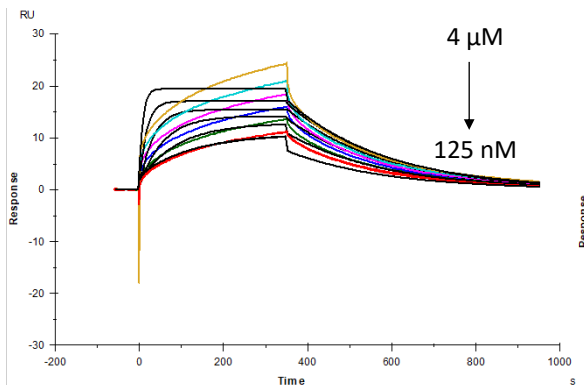

| Curve             | ka (1/Hz) | kd (1/s) | KD (M)   | Rmax (RU) | Conc (M) | tc       | Flow (ul/min) | kt (RU/Hz) | RI (RU)  | Chi² (RU²) | U-value |
|-------------------|-----------|----------|----------|-----------|----------|----------|---------------|------------|----------|------------|---------|
| Cycle: 4 1.25 nM  | 2.778E+4  | 0.004234 | 1.524E-7 | 17.95     | 1.25E-7  | 1.877E+8 | 20.00         | 5.095E+8   | 2.713    | 1.54       | 4       |
| Cycle: 5 250 nM   |           |          |          |           | 2.50E-7  |          | 20.00         | 5.095E+8   | 1.657    |            |         |
| Cycle: 6 500 nM   |           |          |          |           | 5.00E-7  |          | 20.00         | 5.095E+8   | 0.4654   |            |         |
| Cycle: 7 1000 nM  |           |          |          |           | 1.00E-6  |          | 20.00         | 5.095E+8   | -0.05186 |            |         |
| Cycle: 8 2000 nM  |           |          |          |           | 2.00E-6  |          | 20.00         | 5.095E+8   | 0.4380   |            |         |
| Cycle: 9 4000 nM  |           |          |          |           | 4.00E-6  |          | 20.00         | 5.095E+8   | 2.183    |            |         |
| Cycle: 10 1.25 nM |           |          |          |           | 1.25E-7  |          | 20.00         | 5.095E+8   | 2.786    |            |         |

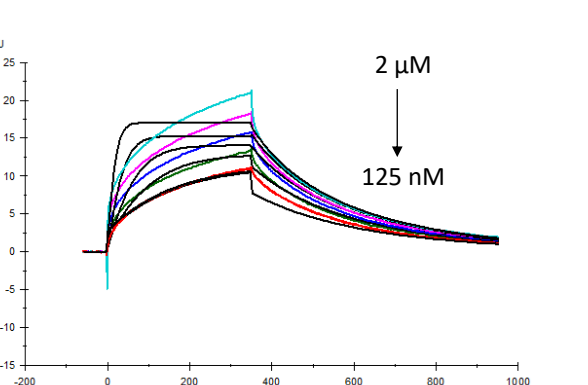

| Curve            | ka (1/Hz) | kd (1/s) | KD (M)   | Rmax (RU) | Conc (M) | tc      | Flow (ul/min) | kt (RU/Hz) | RI (RU) | Chi² (RU²) | U-value |
|------------------|-----------|----------|----------|-----------|----------|---------|---------------|------------|---------|------------|---------|
| Cycle: 4 1.25 nM | 4.10E+4   | 0.005440 | 1.326E-7 | 17.36     | 1.25E-7  | 3.52E+5 | 20.00         | 9.580E+5   | 2.643   | 0.944      | 4       |
| Cycle: 5 250 nM  |           |          |          |           | 2.50E-7  |         | 20.00         | 9.580E+5   | 1.458   |            |         |
| Cycle: 6 500 nM  |           |          |          |           | 5.00E-7  |         | 20.00         | 9.580E+5   | 0.2073  |            |         |
| Cycle: 7 1000 nM |           |          |          |           | 1.00E-6  |         | 20.00         | 9.580E+5   | -0.1707 |            |         |
| Cycle: 8 2000 nM |           |          |          |           | 2.00E-6  |         | 20.00         | 9.580E+5   | 0.6028  |            |         |
| Cycle: 9 1.25 nM |           |          |          |           | 1.25E-7  |         | 20.00         | 9.580E+5   | 2.838   |            |         |

### PNA3-AAm-Bt on chip A:A mismatch

### PNA2-ach

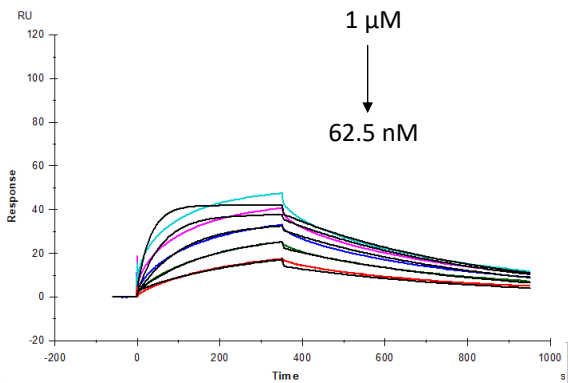

| Curve             | ka (1/Hz) | kd (1/s) | KD (M)   | Rmax (RU) | Conc (M) | tc       | Flow (ul/min) | kt (RU/Hz) | RI (RU) | Chi² (RU²) | U-value |
|-------------------|-----------|----------|----------|-----------|----------|----------|---------------|------------|---------|------------|---------|
| Cycle: 12 62.5 nM | 2.96E+4   | 0.002106 | 7.101E-8 | 40.91     | 6.250E-8 | 1.013E+7 | 20.00         | 2.749E+7   | 2.947   | 2.10       | 2       |
| Cycle: 13 125 nM  |           |          |          |           | 1.250E-7 |          | 20.00         | 2.749E+7   | 2.937   |            |         |
| Cycle: 14 250 nM  |           |          |          |           | 2.500E-7 |          | 20.00         | 2.749E+7   | 1.822   |            |         |
| Cycle: 15 500 nM  |           |          |          |           | 5.000E-7 |          | 20.00         | 2.749E+7   | 1.875   |            |         |
| Cycle: 16 1000 nM |           |          |          |           | 1.000E-6 |          | 20.00         | 2.749E+7   | 3.856   |            |         |
| Cycle: 17 62.5 nM |           |          |          |           | 6.250E-8 |          | 20.00         | 2.749E+7   | 3.038   |            |         |

### DNA8

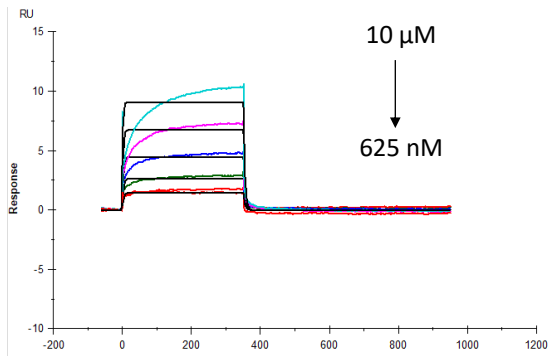

| Curve             | ka (1/Hz) | kd (1/s) | KD (M)   | Rmax (RU) | Conc (M) | Chi² (RU²) | U-value |
|-------------------|-----------|----------|----------|-----------|----------|------------|---------|
| Cycle: 4 625 nM   | 4.941E+4  | 0.2582   | 5.225E-6 | 13.76     | 6.250E-7 | 0.320      | N/A     |
| Cycle: 5 1250 nM  |           |          |          |           | 1.250E-6 |            |         |
| Cycle: 6 2500 nM  |           |          |          |           | 2.500E-6 |            |         |
| Cycle: 7 5000 nM  |           |          |          |           | 5.000E-6 |            |         |
| Cycle: 8 10000 nM |           |          |          |           | 1.000E-5 |            |         |
| Cycle: 9 625 nM   |           |          |          |           | 6.250E-7 |            |         |

### PNA2-H1

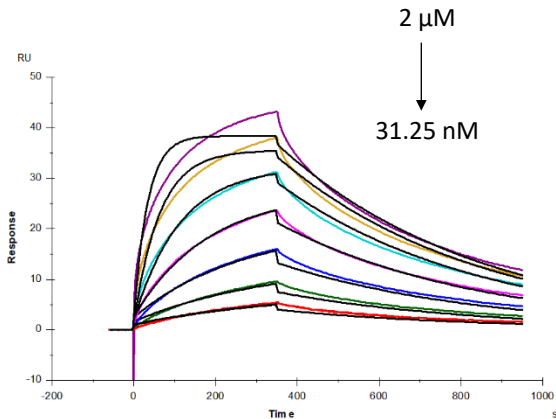

| Curve              | ka (1/Hz) | kd (1/s) | KD (M)   | Rmax (RU) | Conc (M) | tc        | Flow (ul/min) | kt (RU/Hz) | RI (RU) | Chi² (RU²) | U-value |
|--------------------|-----------|----------|----------|-----------|----------|-----------|---------------|------------|---------|------------|---------|
| Cycle: 34 31.25 nM | 1.382E+4  | 0.002035 | 1.473E-7 | 39.49     | 3.125E-8 | 1.887E+13 | 20.00         | 5.122E+13  | 1.812   | 1.10       | 1       |
| Cycle: 35 62.5 nM  |           |          |          |           | 6.250E-8 |           | 20.00         | 5.122E+13  | 1.482   |            |         |
| Cycle: 36 125 nM   |           |          |          |           | 1.250E-7 |           | 20.00         | 5.122E+13  | 2.445   |            |         |
| Cycle: 37 250 nM   |           |          |          |           | 2.500E-7 |           | 20.00         | 5.122E+13  | 2.559   |            |         |
| Cycle: 38 500 nM   |           |          |          |           | 5.000E-7 |           | 20.00         | 5.122E+13  | 1.762   |            |         |
| Cycle: 39 1000 nM  |           |          |          |           | 1.000E-6 |           | 20.00         | 5.122E+13  | 1.143   |            |         |
| Cycle: 40 2000 nM  |           |          |          |           | 2.000E-6 |           | 20.00         | 5.122E+13  | 1.638   |            |         |
| Cycle: 41 31.25 nM |           |          |          |           | 3.125E-8 |           | 20.00         | 5.122E+13  | 1.108   |            |         |

### PNA-H3

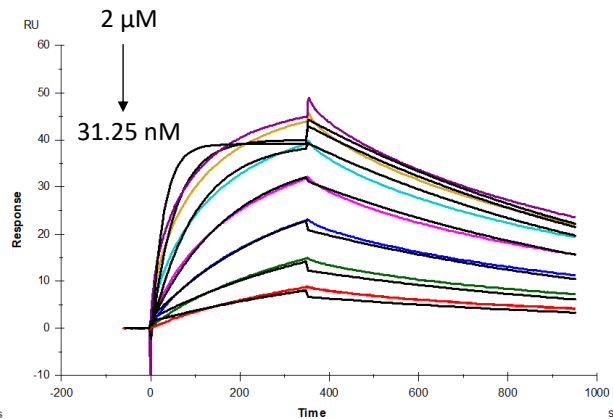

| Curve              | ka (1/Hz) | kd (1/s) | KD (M)   | Rmax (RU) | Conc (M) | tc        | Flow (ul/min) | kt (RU/Hz) | RI (RU) | Chi² (RU²) | U-value |
|--------------------|-----------|----------|----------|-----------|----------|-----------|---------------|------------|---------|------------|---------|
| Cycle: 44 31.25 nM | 1.768E+4  | 0.001156 | 6.535E-8 | 45.90     | 3.125E-8 | 3.412E+14 | 20.00         | 9.262E+14  | 1.393   | 2.08       | 2       |
| Cycle: 45 62.5 nM  |           |          |          |           | 6.250E-8 |           | 20.00         | 9.262E+14  | 1.938   |            |         |
| Cycle: 46 125 nM   |           |          |          |           | 1.250E-7 |           | 20.00         | 9.262E+14  | 2.007   |            |         |
| Cycle: 47 250 nM   |           |          |          |           | 2.500E-7 |           | 20.00         | 9.262E+14  | 0.9595  |            |         |
| Cycle: 48 500 nM   |           |          |          |           | 5.000E-7 |           | 20.00         | 9.262E+14  | -1.182  |            |         |
| Cycle: 49 1000 nM  |           |          |          |           | 1.000E-6 |           | 20.00         | 9.262E+14  | -3.058  |            |         |
| Cycle: 50 2000 nM  |           |          |          |           | 2.000E-6 |           | 20.00         | 9.262E+14  | -5.325  |            |         |
| Cycle: 51 31.25 nM |           |          |          |           | 3.125E-8 |           | 20.00         | 9.262E+14  | -1.427  |            |         |

### PNA2-A3

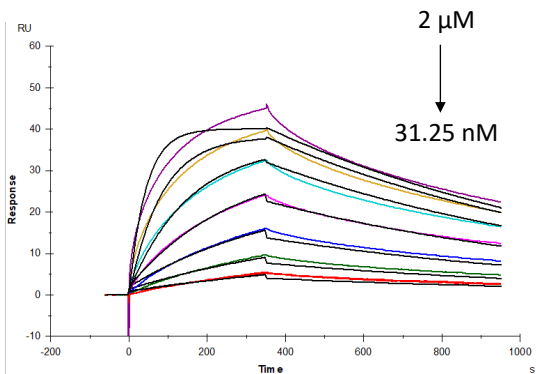

| Curve              | ka (1/Hz) | kd (1/s) | KD (M)   | Rmax (RU) | Conc (M) | tc        | Flow (ul/min) | kt (RU/Hz) | RI (RU) | Chi² (RU²) | U-value |
|--------------------|-----------|----------|----------|-----------|----------|-----------|---------------|------------|---------|------------|---------|
| Cycle: 64 31.25 nM | 1.112E+4  | 0.001085 | 9.761E-8 | 42.42     | 3.125E-8 | 1.978E+14 | 20.00         | 5.376E+14  | 0.9517  | 1.42       | 2       |
| Cycle: 65 62.5 nM  |           |          |          |           | 6.250E-8 |           | 20.00         | 5.376E+14  | 1.430   |            |         |
| Cycle: 66 125 nM   |           |          |          |           | 1.250E-7 |           | 20.00         | 5.376E+14  | 1.895   |            |         |
| Cycle: 67 250 nM   |           |          |          |           | 2.500E-7 |           | 20.00         | 5.376E+14  | 1.841   |            |         |
| Cycle: 68 500 nM   |           |          |          |           | 5.000E-7 |           | 20.00         | 5.376E+14  | 0.7315  |            |         |
| Cycle: 69 1000 nM  |           |          |          |           | 1.000E-6 |           | 20.00         | 5.376E+14  | -0.4545 |            |         |
| Cycle: 70 2000 nM  |           |          |          |           | 2.000E-6 |           | 20.00         | 5.376E+14  | -0.3459 |            |         |
| Flush: 71 31.25 nM |           |          |          |           | 3.125E-8 |           | 20.00         | 5.376E+14  | 0.8644  |            |         |

### PNA-P3

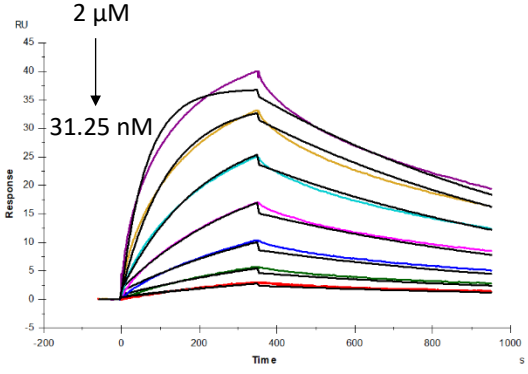

| Curve              | ka (1/Hz) | kd (1/s) | KD (M)   | Rmax (RU) | Conc (M) | tc        | Flow (ul/min) | kt (RU/Hz) | RI (RU) | Chi² (RU²) | U-value |
|--------------------|-----------|----------|----------|-----------|----------|-----------|---------------|------------|---------|------------|---------|
| Cycle: 54 31.25 nM | 7115      | 0.001104 | 1.552E-7 | 38.41     | 3.125E-8 | 7.363E+13 | 20.00         | 1.999E+14  | 0.4922  | 0.489      | 1       |
| Cycle: 55 62.5 nM  |           |          |          |           | 6.250E-8 |           | 20.00         | 1.999E+14  | 0.8493  |            |         |
| Cycle: 56 125 nM   |           |          |          |           | 1.250E-7 |           | 20.00         | 1.999E+14  | 1.441   |            |         |
| Cycle: 57 250 nM   |           |          |          |           | 2.500E-7 |           | 20.00         | 1.999E+14  | 1.958   |            |         |
| Cycle: 58 500 nM   |           |          |          |           | 5.000E-7 |           | 20.00         | 1.999E+14  | 1.718   |            |         |
| Cycle: 59 1000 nM  |           |          |          |           | 1.000E-6 |           | 20.00         | 1.999E+14  | 1.187   |            |         |
| Cycle: 60 2000 nM  |           |          |          |           | 2.000E-6 |           | 20.00         | 1.999E+14  | 1.115   |            |         |
| Cycle: 61 31.25 nM |           |          |          |           | 3.125E-8 |           | 20.00         | 1.999E+14  | 0.3318  |            |         |

### PNA2-N3

2 µM

31.25 nM

### PNA-G3

2 µM

31.25 nM

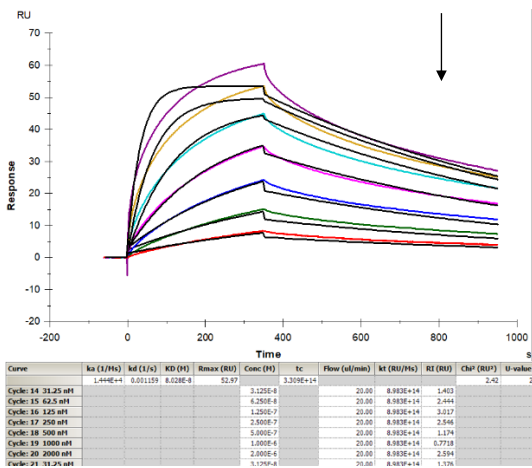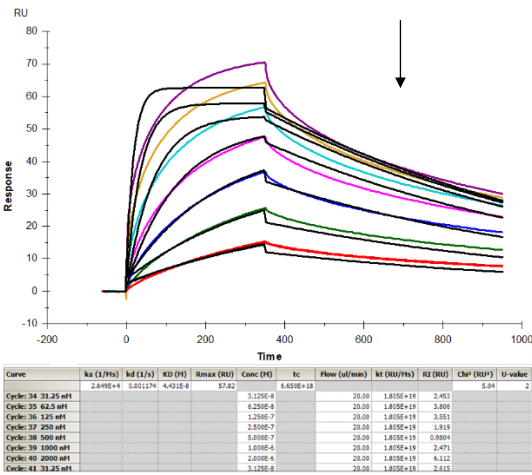

**DNA7-Bt on chip A: A mismatch (No binding observed at the concentrations tested)**

**PNA2-H3**

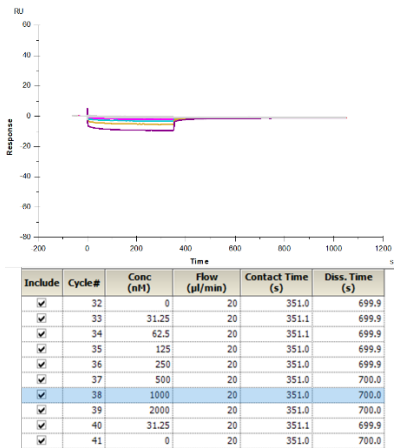

**PNA2-A3**

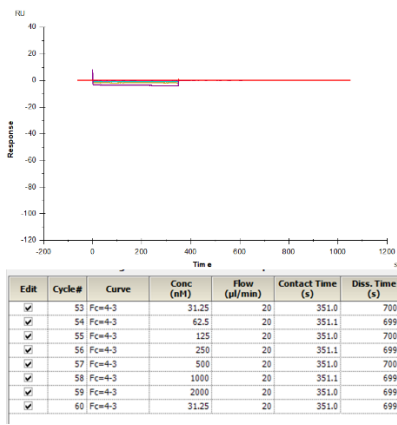

**PNA2-P3**

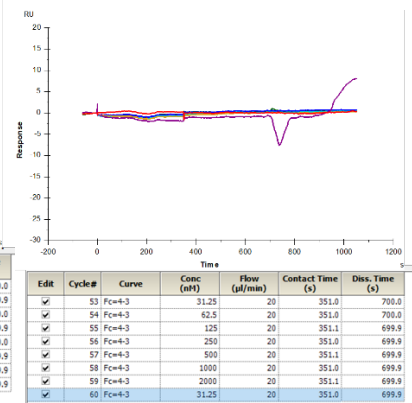

**PNA2-N3**

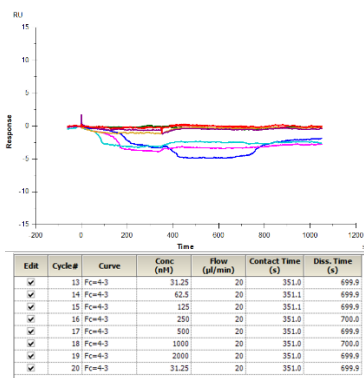

**PNA2-G3**

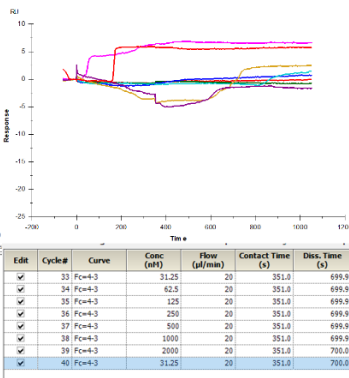

**PNA2-H1**

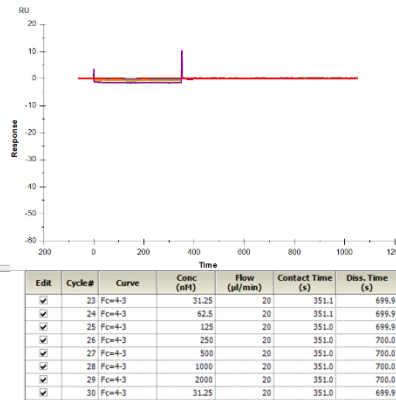

# Copies of the $^1\text{H}$ and $^{13}\text{C}$ NMR spectra for compounds Az-A/H/N/G/P

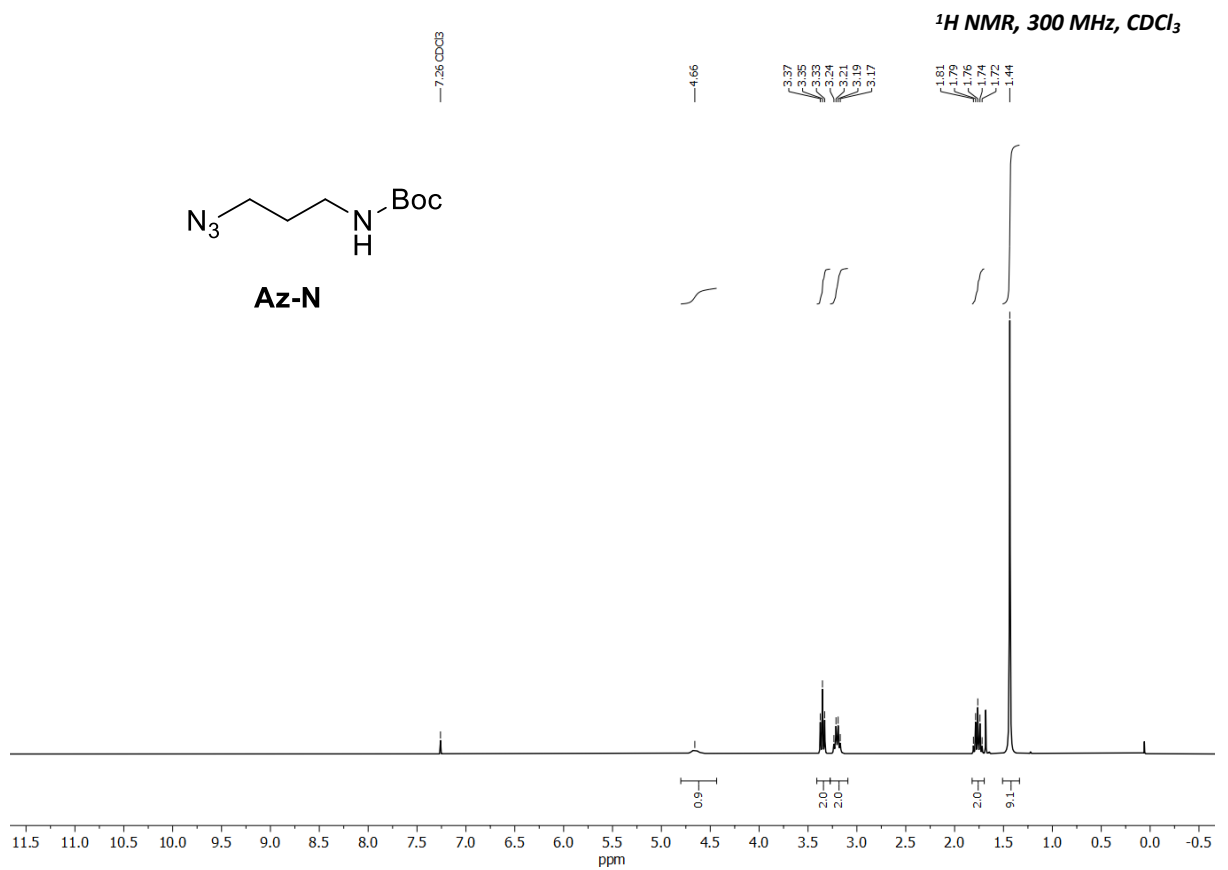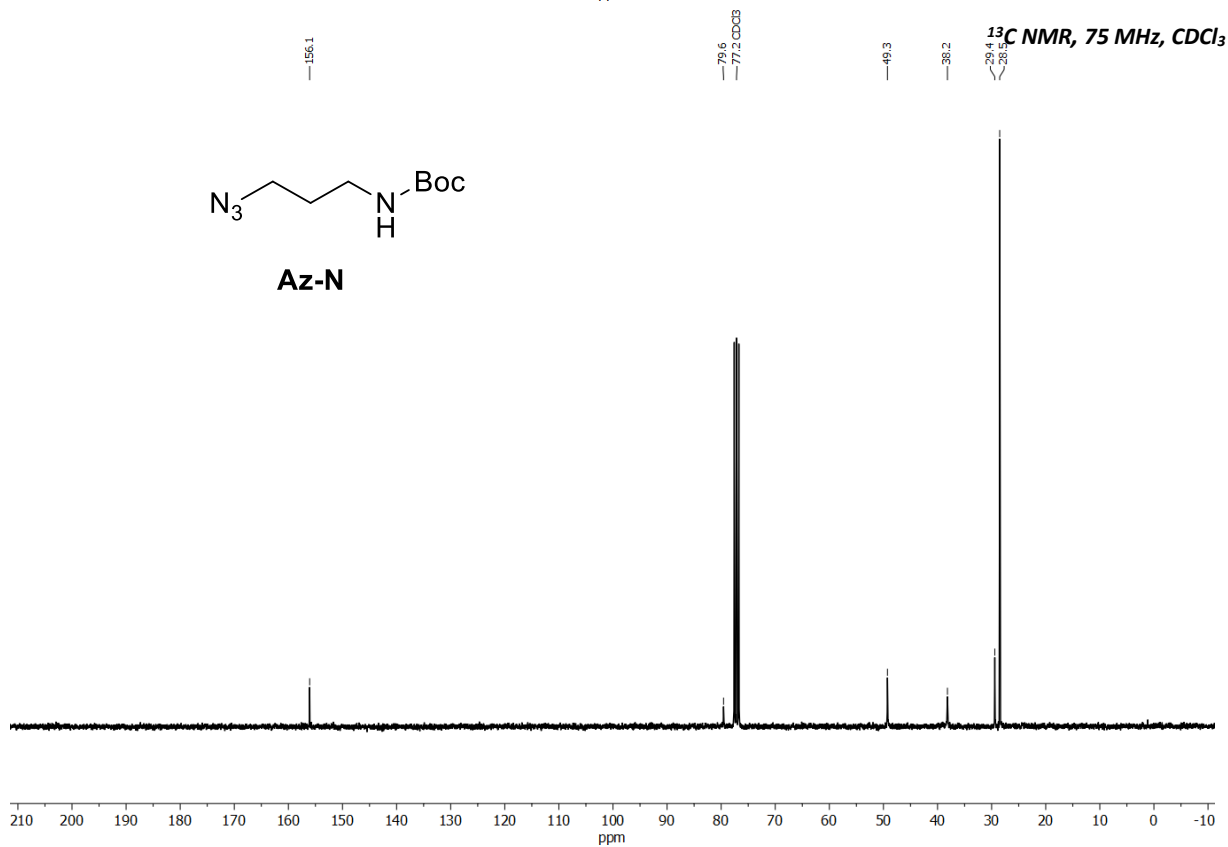



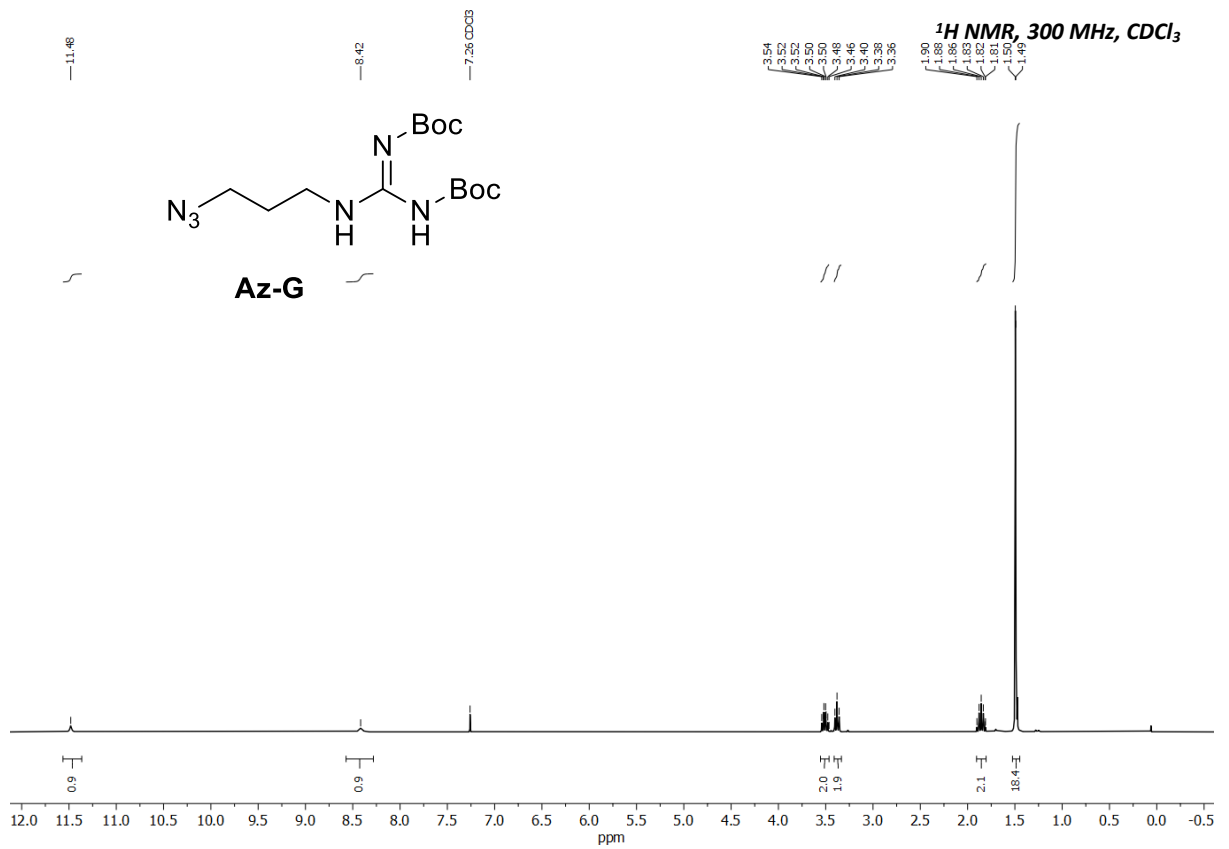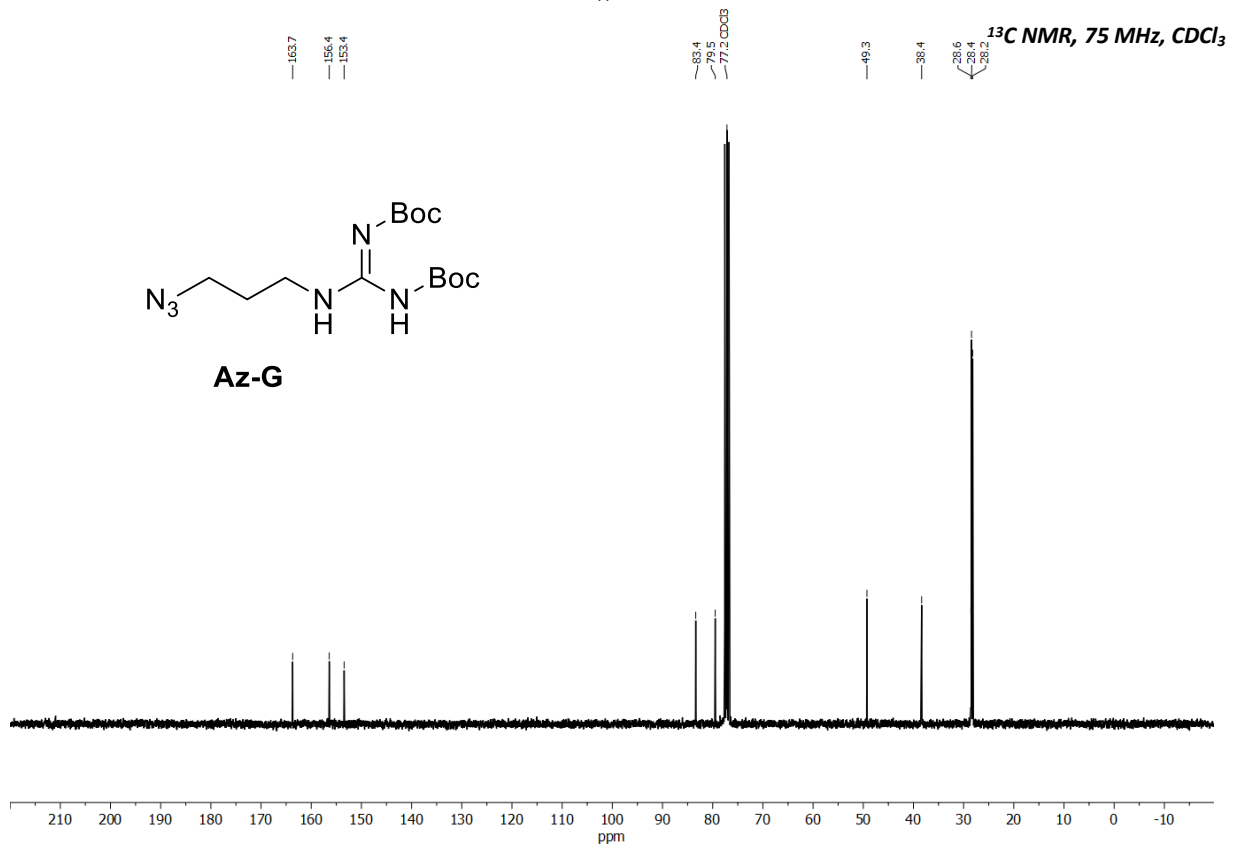

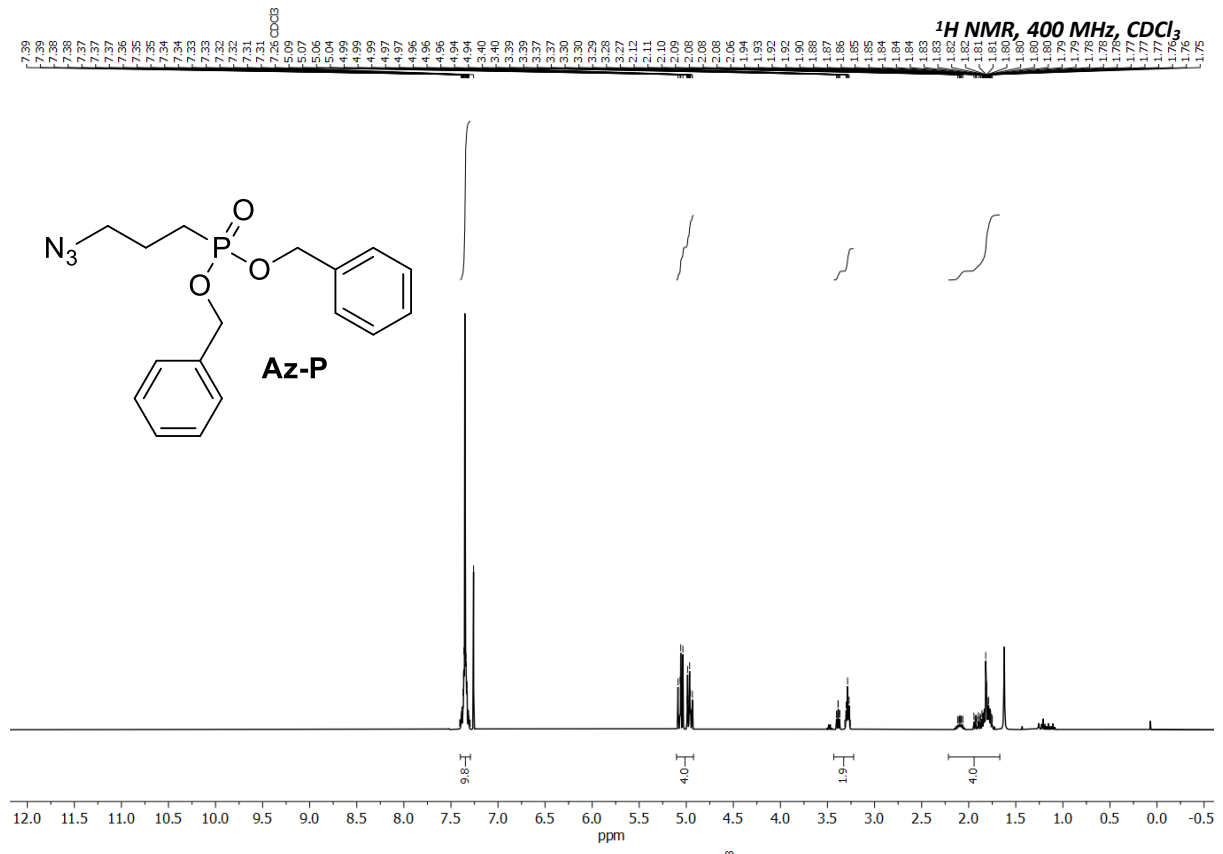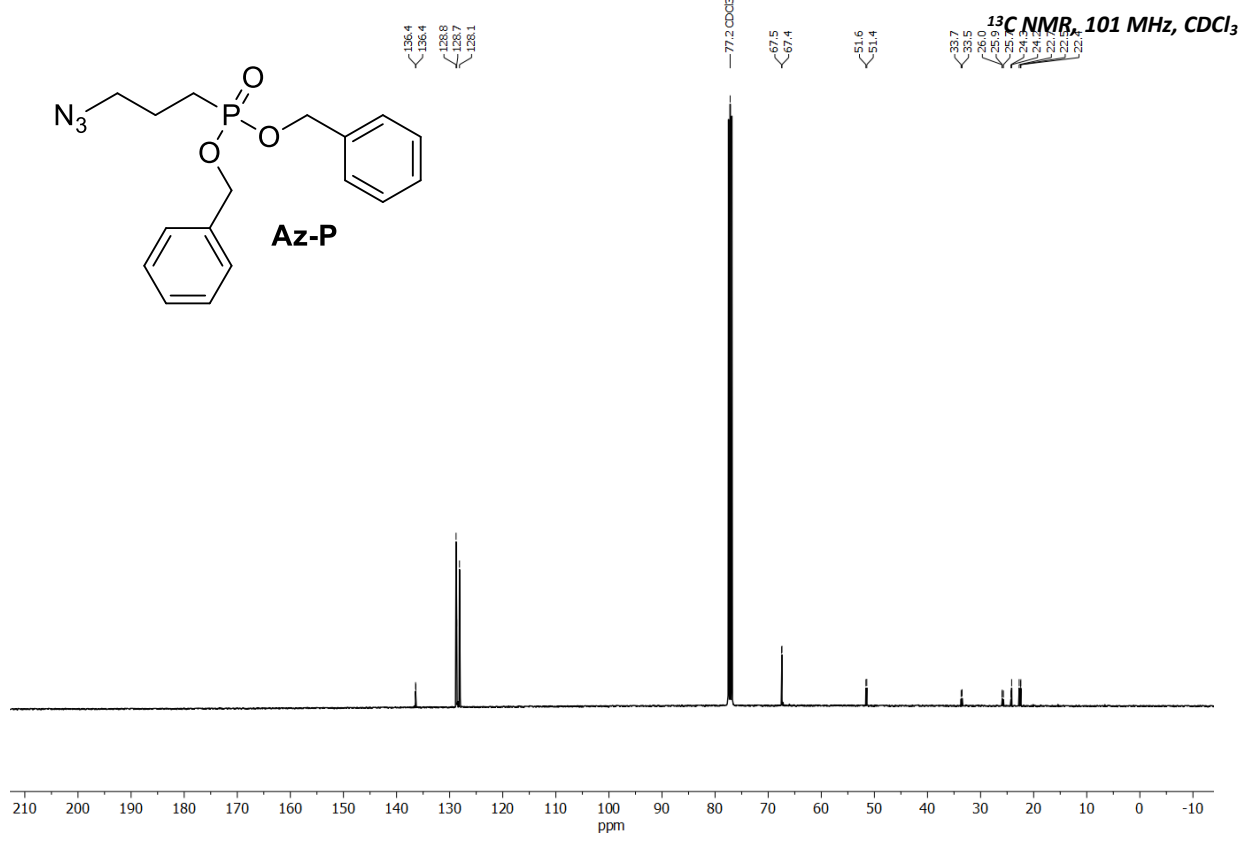



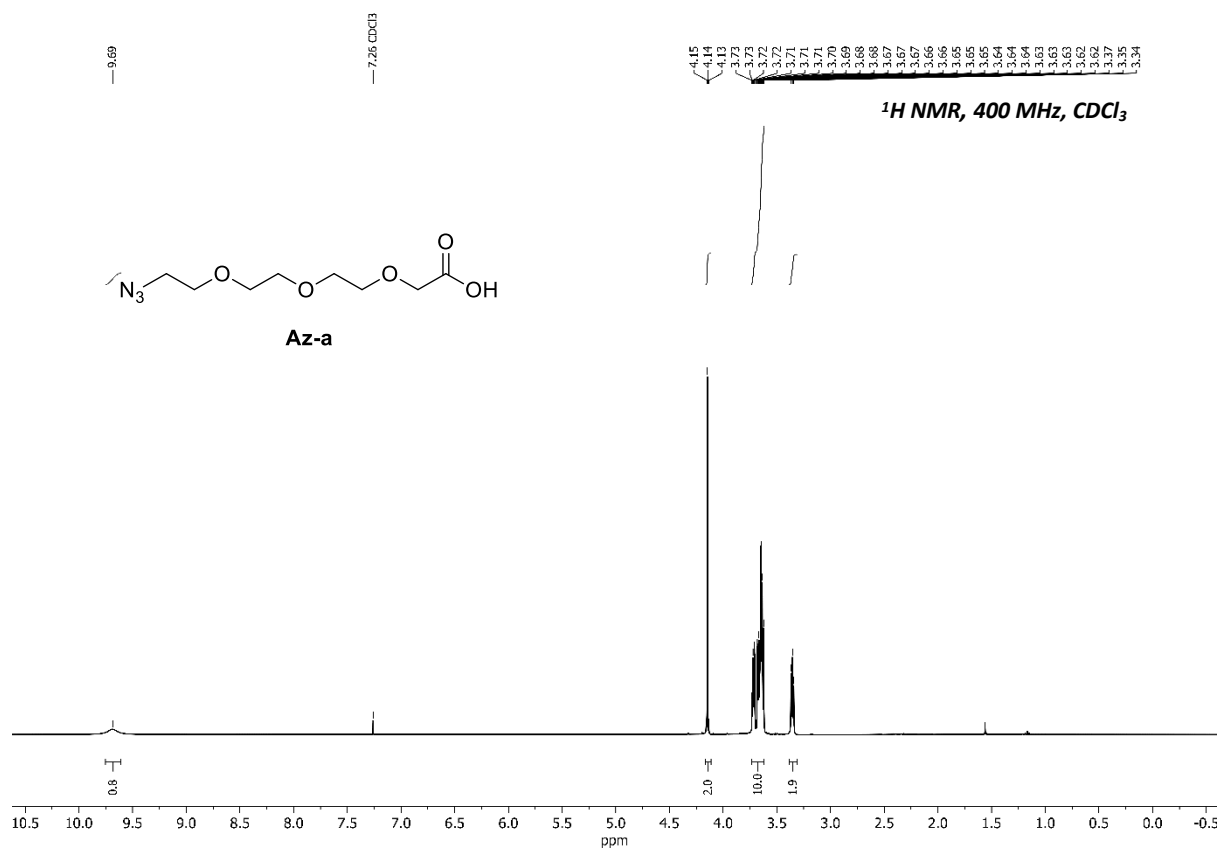

## References

- (1) Chouikhi, D.; Ciobanu, M.; Zambaldo, C.; Duplan, V.; Barluenga, S.; Winssinger, N. Expanding the scope of PNA-encoded synthesis (PES): Mtt-protected PNA fully orthogonal to fmoc chemistry and a broad array of robust diversity-generating reactions. *Chemistry* **2012**, *18* (40), 12698-12704.
- (2) Lopez-Tena, M.; Farrera-Soler, L.; Barluenga, S.; Winssinger, N. Pseudo-Complementary G:C Base Pair for Mixed Sequence dsDNA Invasion and Its Applications in Diagnostics (SARS-CoV-2 Detection). *JACS Au* **2023**, *3* (2), 449-458.
- (3) Khiar, N.; Leal, M. P.; Baati, R.; Ruhlmann, C.; Mioskowski, C.; Schultz, P.; Fernandez, I. Tailoring carbon nanotube surfaces with glyconanorings: new bionanomaterials with specific lectin affinity. *Chem Commun (Camb)* **2009**, (27), 4121-4123.
- (4) Xiao, S.; Fu, N.; Peckham, K.; Smith, B. D. Efficient synthesis of fluorescent squaraine rotaxane dendrimers. *Org Lett* **2010**, *12* (1), 140-143.
